# Supplementary material
Source: publisher figshare collection journal article supplement (https://gsapubs.figshare.com/articles/dataset/_/23800587)
Supplement: Supplementary file 1 [file 1]

## Sheet: Samples
Table S2 Trace elemantal compositions of detrital apatites
	55Mn	2SE	87Sr	2SE	89Y	2SE	139La	2SE	140Ce	2SE	141Pr	2SE	146Nd	2SE	147Sm	2SE	153Eu	2SE	157Gd	2SE	159Tb	2SE	163Dy	2SE	165Ho	2SE	166Er	2SE	169Tm	2SE	172Yb	2SE	175Lu	2SE	232Th	2SE	238U	2SE	LREE	Sr/Y		SVM Class*	Number
	ppm	ppm	ppm	ppm	ppm	ppm	ppm	ppm	ppm	ppm	ppm	ppm	ppm	ppm	ppm	ppm	ppm	ppm	ppm	ppm	ppm	ppm	ppm	ppm	ppm	ppm	ppm	ppm	ppm	ppm	ppm	ppm	ppm	ppm	ppm	ppm	ppm	ppm	ppm	ratio
Jiangshekeng Formation, sandstone, early Cryogenian, N 25°41'06.6", E 116°07'39.3"
FJW14_41_1	997	27	341	11	2092	63	85.8	3.3	295	12	57.7	2.1	425	20	272.1	9.4	20.09	0.58	427	15	72.6	2.1	454	16	81.5	2.2	205.3	6.3	24.95	0.69	134.2	3.6	15.33	0.36	1.21	0.17	8.5	0.25	863.5	0.163002		LM	52
FJW14_41_2	583	17	321	14	836	37	38.7	2	177.7	8.1	35.54	0.98	241	11	126	4.7	24.94	0.87	192.3	8.2	35.1	1.4	218.9	8.9	36.6	1.2	84.7	3.4	10.59	0.42	62	2	7.69	0.26	0.31	0.13	5.64	0.19	492.94	0.383971		HM	40
FJW14_41_3	600	11	634	16	193	12	38.8	1.4	123	5.2	19.9	1.2	109.3	7.7	34.2	2.6	9.45	0.44	36	2.8	5.09	0.35	29.9	2.1	6.21	0.44	17.3	1.1	2.37	0.14	15.52	0.82	2.35	0.12	2.49	0.49	1.95	0.14	291	3.28497		S	7
FJW14_41_4	629	18	1640	140	258	12	37.2	1.3	125.1	3.7	22.77	0.81	138.1	7.1	45.7	2.6	11.08	0.55	53.4	3.2	7.31	0.44	42.7	2.2	8.58	0.43	22.3	1.3	2.93	0.15	17.91	0.89	2.58	0.11	5.94	0.62	2.92	0.23	323.17	6.35659		ALK	0
FJW14_41_5	152.1	4.8	819	40	121.1	5.7	230	11	936	38	140.9	4.4	678	27	120.3	4.3	13.06	0.76	71.3	2.8	6.03	0.2	26	1.2	4.47	0.21	10.44	0.61	1.214	0.074	6.53	0.46	0.879	0.057	25.9	1.3	26	1	1984.9	6.76301		UM	3
FJW14_41_6	1134	43	318	13	1428	53	105.4	4.1	518	16	103.3	3.9	617	22	230.4	6.6	6.27	0.29	270	8.8	43.7	1.4	286.1	7	55.7	1.4	153	4	21.32	0.67	134.4	4.2	17.66	0.62	4.02	0.45	138.5	3.6	1343.7	0.222689		IM	25
FJW14_41_7	347	17	211.1	8	2000	110	173.6	6.2	620	28	117.7	4.5	774	35	289	14	7.83	0.42	372	16	57.7	2.4	355	15	73	3.4	195.5	9.8	26.6	1.3	158.1	9.1	21.4	1.2	5.42	0.44	6.77	0.41	1685.3	0.10555
FJW14_41_8	299	10	207	9	1900	130	103.3	5.3	392	18	78.9	3.8	547	21	226.2	8.8	7.94	0.49	318	14	50.6	2.4	337	20	68.8	4.3	189	12	26.5	2	154.9	9.9	22.2	1.4	4.69	0.51	6.67	0.5	1121.2	0.108947
FJW14_41_9	743	25	580	22	594	22	75.8	3.7	261	10	46.5	2	307	13	98	4.2	20.98	0.99	122.6	4.1	15.38	0.56	93.8	3.7	19.78	0.63	56.5	1.9	8.15	0.33	53.8	2	9.44	0.38	4.05	0.27	6.93	0.21	690.3	0.976431
FJW14_41_10	658	37	833	70	346	17	42.3	3.7	143	13	27.6	2.7	167	14	55.4	4.5	13.12	0.65	71.2	4.2	9.31	0.35	54.7	2.7	11.29	0.43	31.8	1.7	4.35	0.17	30.8	1.6	4.96	0.2	7.42	0.98	8.23	0.54	379.9	2.40751
FJW14_41_11	506	21	101.5	4.3	723	24	2.22	0.19	7.72	0.61	1.46	0.12	9.72	0.77	6.04	0.46	3.9	0.18	18.7	0.76	5.22	0.23	62.5	2.4	21.85	0.72	97.7	3.3	19.38	0.55	149.2	5.3	23.48	0.65	0.61	0.26	2.652	0.087	21.12	0.140387
FJW14_41_12	522	19	97.3	3.5	1948	88	72.6	3.2	272	10	49.7	1.9	333	16	160.6	7.6	7.98	0.36	263.1	8.3	50.2	1.5	383	13	81.3	2.4	210	7.2	22.68	0.83	94.8	3.6	9.68	0.31	3.45	0.24	11.19	0.35	727.3	0.0499487
FJW14_41_13	528	14	675	23	697	27	343	12	1068	43	183.6	4.9	1124	48	277.5	8.9	39.7	1.6	241.4	7.5	26.49	0.74	142.8	3.5	25.51	0.83	64.5	2.1	7.22	0.24	41.1	1.4	5.83	0.16	37.6	1.5	27.39	0.8	2718.6	0.968436
FJW14_41_14	428.8	9.3	185.6	4.3	944	70	222	32	820	100	153	17	906	77	430	26	8.41	0.49	638	33	83.7	4.7	332	22	33	2.1	42.9	3.4	2.74	0.26	10	1.3	0.89	0.13	0.447	0.081	29.7	2	2101	0.19661
FJW14_41_15	1197	49	175.5	6.1	157.5	5.6	44.7	1.7	200.5	8.6	32.5	1.3	232.7	8.7	111.7	4.3	23.07	0.78	151.6	4.8	16.63	0.49	57.2	2	5.15	0.21	6.36	0.3	0.501	0.034	1.96	0.15	0.175	0.018	0.32	0.057	7.59	0.21	510.4	1.11429
FJW14_41_16	403	14	541	17	2024	75	130.1	4.8	494	13	86.7	3.1	508	20	257.6	9.8	50.9	1.4	437	12	78.9	2.4	478	15	76.2	2.3	162.4	4.5	15.5	0.54	69.6	2.3	7.55	0.24	0.872	0.074	38.65	0.93	1218.8	0.267292
FJW14_41_17	287	29	391	13	1117	79	63	12	245	48	40.5	7.7	223	38	97	15	7.78	0.39	149	17	28.9	3	216	19	45.7	3.6	127	11	17.1	1.7	97	11	11.4	1.5	1.61	0.24	45	10	571.5	0.350045
FJW14_41_18	462	12	343.2	9.7	1348	46	66.4	2.3	306	13	66.1	2.6	427	15	218.4	7.8	31.64	0.93	302.2	7.4	48.6	1.3	294	10	50.4	1.5	126.1	4.1	15.43	0.46	83.8	2.5	10.36	0.28	0.94	0.1	45.9	1.1	865.5	0.254599
FJW14_41_19	391	12	217.5	6	2620	110	188	12	646	35	103.4	5.4	616	32	251	10	67	2.9	354	16	57.3	2.6	413	18	88.3	3	257	11	33.3	1.4	198.2	9.1	28.3	1.3	26.7	1.7	18.86	0.74	1553.4	0.0830153
FJW14_41_20	110.5	5.8	362	11	189.6	4.2	79.8	3	483	13	107.6	4	714	20	229.3	6.9	30.52	0.97	177.5	6.1	15.82	0.62	57.3	1.7	6.65	0.26	13.06	0.58	1.17	0.11	5.16	0.49	0.57	0.037	1.4	0.25	9.52	0.17	1384.4	1.90928
FJW14_41_21	276	11	510	16	849	34	395	16	1599	49	295	11	1561	45	367	12	69.8	2.1	296.4	9.2	35.2	1.1	184.5	6.1	31.35	0.98	75.3	2.4	9.03	0.3	54	1.5	7.06	0.19	14.82	0.59	20.55	0.57	3850	0.600707
FJW14_41_22	1127	34	48	2.2	2226	75	209	10	646	29	103.4	4.8	566	21	260.4	9.9	3.24	0.14	385	14	75.4	2.7	490	16	85.5	3.2	188.9	6.5	20.04	0.72	95.9	3.6	9.75	0.36	1.71	0.27	2.29	0.23	1524.4	0.0215633
FJW14_41_23	195	7.4	456	15	540	22	15.81	0.69	64.7	2.2	11.9	0.49	86.4	4.1	53.3	2	14.33	0.67	114.8	3.8	21.85	0.72	135.3	4.7	22.46	0.88	54.5	1.9	6.84	0.28	37.9	1.5	4.4	0.15	0.563	0.081	2.8	0.17	178.81	0.844444
FJW14_41_24	690	24	314	11	1075	43	90.8	3.5	388	18	75.7	2.8	558	24	317.1	9.4	49.13	0.9	456	14	63.1	2.2	290.1	8	41.2	1.2	88.1	3.5	10.96	0.44	67.8	2.2	10.72	0.38	0.438	0.052	30.97	0.96	1112.5	0.292093
FJW14_41_25	411	20	291	33	125.4	6.3	255	11	495	21	52.4	2.5	214.4	8.6	36.4	1.9	8.35	0.42	34.6	1.8	4.12	0.2	23.3	1.3	4.62	0.26	12.15	0.73	1.4	0.11	8.12	0.58	1.117	0.068	13.58	0.56	34.7	1.6	1016.8	2.32057
FJW14_41_26	1289	44	164.4	5.9	1060	47	77.7	2.8	298.9	9	65.8	2.9	464	17	188.5	8.8	124.3	4.2	231.4	7.4	32.5	1.1	211.4	6.8	41.6	1.4	115.5	4.5	16.16	0.62	108.8	4	16.09	0.52	3.17	0.23	23.27	0.83	906.4	0.155094
FJW14_41_27	1832	61	133.1	4.8	349	18	165.3	6.6	580	30	93.7	6.1	533	35	178	8.1	41.7	2.2	204	11	22.5	1.1	86.2	4.3	8.96	0.44	14.2	0.72	1.122	0.073	4.42	0.33	0.447	0.031	43.6	3.8	37.6	1.8	1372	0.381375
FJW14_41_28	540	18	54.3	2	4930	210	283	9.8	976	39	174	6.5	1115	37	491	16	59.5	2.2	787	29	122.2	3.2	838	30	177.6	5.8	471	15	57.1	2.2	308.7	9.9	42.9	1.2	90.1	4.7	33.1	1.4	2548	0.0110142
FJW14_41_29	1447	46	325.2	9.7	1277	52	55.1	2.6	234.2	9.3	42.2	1.7	263.9	9.5	117.5	4.7	26.9	1	174.2	5.2	31.6	1	227.3	6.7	46.4	1.5	130.8	4.4	17.42	0.59	104.6	3.4	13.27	0.45	1.45	0.14	29.52	0.9	595.4	0.254659
FJW14_41_30	361	12	375	10	890	30	14.5	0.63	49.4	1.9	9.04	0.36	63.9	2.2	42.3	1.5	8	0.27	106.4	3.6	21.66	0.78	153.2	5.1	29.38	0.66	73.8	2.3	8.99	0.3	46.4	1.5	5.46	0.14	0.384	0.052	8.49	0.34	136.84	0.421348
FJW14_41_31	340	11	197.2	6.1	624	21	5.24	0.27	19.85	0.79	3.7	0.19	25.2	1.3	13.88	0.74	4.69	0.2	30.8	1.3	7.54	0.25	75.3	2.6	20.79	0.69	74.7	2.4	11.99	0.35	76.4	2.4	9.89	0.31	0.718	0.081	11.73	0.38	53.99	0.316026
FJW14_41_32	578	17	452	19	1288	44	76.2	3	320	11	62.8	2.7	380	13	179.8	5.2	28.82	0.93	311.6	8.7	61.6	1.7	352	10	54.6	1.7	113.2	3.1	11.7	0.39	59.4	1.9	7.21	0.25	10.1	1	28.59	0.79	839	0.350932
FJW14_41_33	829	24	225.1	9	1347	42	239.8	6.7	569	20	73.7	2.2	348	12	127.1	3.7	16.82	0.64	204.6	6.9	37.43	0.98	263.2	9.3	50.8	1.5	139.5	4	18.83	0.58	112.3	3.4	14.43	0.36	7.45	0.41	17.04	0.45	1230.5	0.167112
FJW14_41_34	437	13	310	9.1	1126	40	29.1	1.2	103	3.3	20.63	0.82	153.3	6.4	91.9	2.5	39.5	1.3	171.4	4.6	30.29	0.8	214.5	6.1	43.5	1.3	119.4	3.3	14.9	0.46	84	2.6	10.43	0.31	0.087	0.026	1.293	0.064	306.03	0.275311
FJW14_41_35	549	37	353	42	862	40	46.1	3.8	184	12	38.1	2.2	254	16	119.6	7.7	10.67	0.53	159.4	7.9	25.6	1.3	174.3	8	35.1	1.9	102.2	6	14.13	0.63	90.4	3.4	11.78	0.48	18.7	5.1	6.46	0.34	522.2	0.409513
FJW14_41_36	460	16	371	13	186.5	7.1	19.86	0.88	81.4	3.5	16.74	0.73	121.2	5.2	46.5	1.6	6.68	0.25	55	2.1	6.15	0.21	33.5	1.1	6.53	0.17	16.21	0.6	1.823	0.079	10.01	0.45	1.504	0.062	3.2	0.22	1.562	0.052	239.2	1.98928
FJW14_41_37	347.8	8.8	258.5	9.9	347	13	12.73	0.99	40.5	2.5	7.44	0.47	46.7	3.4	17.3	1.1	3.07	0.18	29.6	1.5	5.39	0.25	43.1	1.7	11.18	0.43	37	1.6	5.83	0.26	37.3	1.7	6.07	0.27	3.11	0.46	2.68	0.2	107.37	0.744957
FJW14_41_38	404	13	172.3	5.2	1492	50	46.1	2.2	163.2	6.3	30.4	1.5	201.4	7.7	95	4.3	7.02	0.32	162.2	7.3	27.3	1.1	206.5	8.1	50.4	2	159.8	6.6	23.61	0.87	146.4	4.8	21.67	0.91	12.17	0.61	28	1.2	441.1	0.115483
FJW14_41_39	112.7	7.9	269	15	1600	100	1.97	0.3	14.6	1.3	5.31	0.38	66	6.2	77.9	6.2	7.26	0.65	188	12	38.7	2.8	274	18	55.3	4.2	142	13	15.6	1.5	68.1	5.8	6.84	0.5	0.062	0.039	8.85	0.99	87.88	0.168125
FJW14_41_40	289	12	204.5	7.9	3590	140	311	19	1133	58	214	12	1292	57	462	23	32.4	1.4	628	29	97	4.8	635	28	130	5.9	348	16	41.4	1.9	227	12	29.1	1.4	82.4	7.5	11	0.7	2950	0.0569638
FJW14_41_41	317	12	627	22	146.2	8.4	24.1	1.2	90.6	6.3	15.47	0.86	96	7	29.5	1.9	7.95	0.53	35.1	1.9	4.26	0.32	25.6	1.5	5.38	0.3	14.15	0.92	1.83	0.12	11.47	0.78	1.95	0.13	11.43	0.88	3.13	0.26	226.17	4.28865
FJW14_41_42	1540	57	83.6	3.6	1436	40	171.6	6.1	596	22	100.5	3.8	540	17	223.2	7.7	5.34	0.22	278.4	8.8	51.8	1.6	320.5	8.9	53.6	1.8	116.9	3.2	12.99	0.41	64.2	2.4	6.82	0.21	1.036	0.091	4.61	0.17	1408.1	0.0582173
FJW14_41_43	309	21	267	14	1056	61	71.9	3.6	285	19	53	2.6	319	13	152.5	5.3	10.32	0.47	247	12	45.4	1.9	258	13	41.1	1.4	95.3	2.6	11.35	0.41	62.5	3	7.87	0.38	2.24	0.3	20.7	0.77	728.9	0.252841
FJW14_41_44	510	18	233	12	1193	57	774	36	2140	120	293	12	1385	65	382	15	21.29	0.93	337	12	42.8	1.5	240.7	9.1	41	1.5	106.3	5.6	12.7	0.54	77.3	3.5	11.83	0.5	49	2.6	24.5	1.1	4592	0.195306
FJW14_41_45	485	21	497	20	527	21	479	23	1272	54	192.7	8.5	980	45	216.4	8	46.1	1.9	195.5	8.6	21.63	0.89	122.3	5.8	21.4	1	50.1	2.2	5.96	0.25	31.2	1.2	4.43	0.2	7.36	0.63	3.63	0.13	2923.7	0.943074
FJW14_41_46	219.8	7	160.9	5.6	902	31	46.6	2.3	242	11	50.9	1.9	355	16	181.9	7.5	3.14	0.18	283.4	9.8	44.7	1.6	243.2	8.5	37.5	1.4	77.5	3.1	8.51	0.32	51.5	1.9	7.05	0.23	3.64	0.35	74.6	2.6	694.5	0.178381
FJW14_41_47	426	14	87.5	2.9	687	25	74.1	2.8	309	13	62.2	2.2	434	16	245.4	7.2	19.25	0.48	308	10	38.2	1	182.7	5.5	26.7	0.87	53	1.9	4.75	0.18	21.4	1.1	2.59	0.13	1.03	0.23	9.32	0.55	879.3	0.127365
FJW14_41_48	390	13	511	26	54.9	2.2	114.4	5	249.6	8.8	29.7	1.6	119.6	6	18.85	0.89	6.6	0.31	15.96	0.74	1.691	0.084	9.25	0.43	1.78	0.084	4.98	0.27	0.687	0.048	4.22	0.23	0.882	0.042	7.57	0.41	27.54	0.95	513.3	9.30783
FJW14_41_49	747	28	506	82	575	23	27.64	0.97	112.2	3.7	23.1	1.1	152.1	7.8	70.5	3.6	10.09	0.54	100.3	5.3	18.22	0.7	117.2	5.8	21.7	1	50.1	2.5	6.32	0.4	30.9	2	3.69	0.23	2.36	0.43	10.9	1.2	315.04	0.88
FJW14_41_50	807	27	202.2	9	1242	58	101.6	4	357	15	62.9	2.6	365	18	182.2	8	27.4	1.1	317	13	62.3	2.3	354	12	51.6	2	101.3	4.1	9.73	0.4	45.2	1.9	5.24	0.23	1.17	0.15	26.91	0.88	886.5	0.162802
FJW14_41_51	463	13	76.5	2.7	1640	55	259.4	9.7	828	25	144.9	4.6	812	26	245.7	7.7	19.21	0.63	282	7.4	39.7	1.3	248	7.1	51.8	1.6	145.8	3.9	19.51	0.54	114.6	2.9	18.5	0.5	19.81	0.79	12.53	0.33	2044.3	0.0466463
FJW14_41_52	723	25	132.1	4.5	3620	150	261.7	9.2	1101	41	197.8	7	1178	38	484	18	5.74	0.2	667	22	116.8	3.6	773	23	145.4	4.3	376	13	46.3	1.4	243.8	7.7	28.72	0.89	3.03	0.25	54.5	1.8	2738.5	0.0364917
FJW14_41_53	363	11	1406	51	470	18	507	18	1327	52	205	9	1017	38	219.6	6.2	48.4	1.7	195	6.7	22.59	0.76	117.5	3.7	18.87	0.67	41.7	1.4	4.45	0.17	22.5	1	2.66	0.12	4.84	0.28	1.681	0.05	3056	2.99149
FJW14_41_54	213.4	5.3	474	18	1205	37	126.6	6.8	453	20	78.8	3.2	476	23	239.1	8.4	53	1.8	396	11	64.7	2	330	10	44.9	1.7	83.1	3.5	7.42	0.42	33.4	1.9	3.81	0.22	29.6	9.3	45.1	1.6	1134.4	0.393361
FJW14_41_55	410	15	178	14	363	17	39.6	2.1	191.1	9	41.8	1.5	267	11	86.9	3.8	19.77	0.84	93.8	4.1	12.18	0.56	69.2	3.6	13.65	0.58	35.8	1.6	4.56	0.24	27.8	1.2	4.24	0.18	2.01	0.18	18.18	0.83	539.5	0.490358
FJW14_41_56	439	17	320	55	1335	58	42.4	1.7	145.2	6.9	27.7	1.5	177.3	7.2	99.8	4.1	5.03	0.29	203.6	7	40.1	1.8	277.6	8.6	50.4	1.7	129.8	4.6	17.77	0.73	108.9	4.1	13.51	0.49	4.63	0.79	9.6	0.29	392.6	0.2397
FJW14_41_57	788	34	414	18	1330	60	59.8	3.6	236.3	9.9	49.5	2.2	334	18	168.6	5	18.59	0.75	237	8.3	39.5	1.4	253	11	48.8	2	131.3	4.4	16.79	0.56	100.1	4.6	12.75	0.46	1.08	0.1	3.99	0.15	679.6	0.311278
FJW14_41_58	289.4	8.6	754	24	216	6.9	642	22	1334	50	151.6	6.4	651	29	112.9	4.6	17.52	0.72	89.2	3.1	9.2	0.41	46.1	1.7	7.97	0.34	19.38	0.9	2.24	0.11	11.64	0.64	1.664	0.085	42.2	2.1	35.51	0.81	2778.6	3.49074
FJW14_41_59	1246	32	439	29	914	28	40.4	4.2	243	18	60.1	3	439	18	234.5	7.8	12.58	0.49	304	11	42.5	1.3	220.3	6.5	32.42	0.96	72	1.9	9.59	0.33	61	1.8	8.02	0.3	2.93	0.36	32.2	1.1	782.5	0.480306
FJW14_41_60	316.4	9	342	11	239.4	9.8	5	0.3	19.1	1	3.69	0.21	25.9	1.3	13.1	0.67	7.73	0.4	26.7	1.2	4.64	0.17	35.2	1.5	8.16	0.29	23.86	0.93	3.04	0.11	19.2	0.87	3.34	0.13	2.21	0.38	2.09	0.14	53.69	1.42857
FJW14_41_61	749	28	532	63	964	40	71.9	3.1	295	12	51.1	2.4	308	12	151.3	5.9	22.2	1	209.8	4.9	37.4	1.2	234.8	7.6	47.5	1.5	131.6	5.1	19.78	0.76	129.1	5.3	17.64	0.59	1.2	0.16	37.07	0.98	726	0.551867
FJW14_41_62	660	32	227	13	4890	250	888	58	2570	110	371	24	1840	110	574	25	71.2	2.7	737	38	132.5	4.8	871	36	182.5	8.7	532	20	72	3.7	455	25	59.5	2.1	2.58	0.23	61	1.6	5669	0.0464213
FJW14_41_63	383	12	254.4	9.6	1199	56	75.3	2.5	244.3	8.7	43.4	1.6	266	12	134.5	4.7	17.42	0.66	249.3	7.8	48.7	1.8	299	9.1	47.8	1.5	114.6	3.6	13.46	0.53	74.5	2.6	9.45	0.35	0.72	0.12	20.95	0.54	629	0.212177
FJW14_41_64	255	11	354	12	876	35	35.5	1.4	176.3	8.3	40.7	1.6	300	13	171.1	7.6	18.83	0.74	260.4	7.5	44.5	1.5	245.5	7.7	37.5	1.7	81.8	3	8.85	0.32	45.4	2.1	5.45	0.25	0.179	0.035	11.02	0.39	552.5	0.40411
FJW14_41_65	1135	38	324	13	1783	90	203	10	759	34	127.4	6.2	624	28	213.6	7.5	7.47	0.32	248.5	7.4	51.1	1.7	331	11	59.3	1.5	163	6.2	21.21	0.75	128.9	4.9	14.9	0.49	2.45	0.22	69.1	2	1713.4	0.181716
FJW14_41_66	193.4	5.8	334	11	248.3	8.9	248	11	742	29	98.4	3.3	475	19	92.3	2.9	15.47	0.61	83.5	2.8	9.52	0.35	51.4	1.8	9.12	0.37	22.23	0.75	2.592	0.097	13.79	0.53	1.905	0.072	49.8	3.3	33.9	1.1	1563.4	1.34515
FJW14_41_67	264.8	7.1	250.3	9.1	418	13	18.94	0.73	61.1	2	10	0.47	53.1	2.3	19	1.1	7.24	0.32	34.2	1.5	6.63	0.25	57	2.2	15.44	0.75	51.4	2.2	7.11	0.39	41.3	1.9	6.1	0.28	3.72	0.3	6.85	0.36	143.14	0.598804
FJW14_41_68	472	17	472	18	1439	76	81.1	3.8	338	15	68.2	3.1	433	14	247	11	47.6	1.9	402	17	67.9	2.6	384	12	56.4	2.1	119.6	4.6	12.92	0.52	68.7	3.2	8.5	0.26	0.55	0.087	37.9	1.1	920.3	0.328006
FJW14_41_69	456	15	422	14	752	25	3350	140	5600	240	575	20	2201	89	376	14	22.97	0.87	290.9	8.9	32.1	1	163.1	6.3	29.2	1	73.3	2.3	9.01	0.35	51.5	1.9	7.54	0.2	192.1	7.7	152.1	4.2	11726	0.56117
FJW14_41_70	804	33	130.5	4.3	1306	48	42.1	2.5	145.2	6.9	27.3	1.4	184	10	100.5	4.4	7.06	0.31	198.6	9.7	38.2	1.6	274	11	52.1	1.9	136.8	4.6	18.37	0.71	114.1	4.1	14	0.48	1.19	0.2	8.62	0.38	398.6	0.0999234
FJW14_41_71	251.4	5.7	246.6	9.9	530	14	80.7	3	298	11	55.4	1.5	336.9	9.6	136.3	3.9	16.2	0.55	179.8	4.8	26.04	0.6	131.4	3.9	19.39	0.67	42.5	1.2	4.89	0.15	27.2	1.1	3.48	0.12	1.15	0.11	25.4	0.77	771	0.465283
FJW14_41_72	163	5.6	1302	41	144.9	5.5	1303	49	1599	55	133.1	4.9	458	17	59.2	2	14.89	0.59	45.4	1.9	4.33	0.14	23.05	0.93	4.14	0.19	11.97	0.47	1.676	0.086	11.03	0.46	2.077	0.087	93.6	5.7	72	4.5	3493.1	8.98551
FJW14_41_73	494	20	136.4	4.8	1233	97	189	13	589	38	95	6.6	543	40	190	12	37.2	2.8	239	20	32.3	2.6	194	14	39.6	2.4	118.6	8.8	15.2	1.1	97.2	7.5	16.1	1.1	76.7	9.4	94.8	7.6	1416	0.110624
FJW14_41_74	307.5	8.5	115.7	3.6	1103	35	66.5	3.8	207.4	5.6	33.1	1.3	181.3	7.1	66.1	2.8	16.04	0.62	113.5	3.4	20.04	0.47	150.4	4.6	37.3	1.1	116	3.7	16.02	0.5	100	2.7	16.71	0.54	2.06	0.21	21.08	0.48	488.3	0.104896
FJW14_41_75	976	44	475	18	1745	62	149	5.8	607	25	103.9	3.6	576	24	248.3	8.2	19.7	0.83	314	12	63	2.3	383	14	62.4	2	147.9	5.1	17.15	0.59	86.4	2.9	9.23	0.37	16.84	0.8	17.51	0.69	1435.9	0.272206
FJW14_41_76	1480	14	744	29	809.9	8.7	19.3	1.4	68.2	3.8	12.68	0.72	77.2	4.3	27.8	1.8	5.5	0.27	42.2	1.1	7.88	0.22	81.1	1.9	25.59	0.63	91.2	2.1	13.18	0.37	77.8	1.8	10.12	0.31	8.84	0.77	2.57	0.25	177.38	0.918632
FJW14_41_77	425	15	814	26	1700	61	451	18	1621	80	314	14	1717	62	459	17	13.76	0.5	422	14	57.5	2.3	343	11	63.5	2.5	165.7	7	20.66	0.96	117.7	4.8	15.47	0.62	25.3	1.6	37.3	1.5	4103	0.478824
FJW14_41_78	232.6	9.7	123.1	6.7	1656	71	21.3	1	80.3	3.2	16.31	0.93	109	4.6	63.2	3	7.46	0.44	132.2	5.2	27.7	1.4	227.6	9.4	54.7	2.1	170.4	7.8	23.3	0.83	137.8	6.2	20.33	0.95	0.376	0.093	9.01	0.51	226.91	0.0743357
FJW14_41_79	320	13	718	32	646	48	301	28	946	81	158	14	822	55	184	12	19.6	1.4	163	12	20.7	1.5	116.9	7.8	22.9	1.6	68.3	3.6	10.1	0.66	64.3	3.4	9.85	0.5	18.8	1.4	10.23	0.62	2227	1.11146
FJW14_41_80	408	14	517	17	1292	41	60.4	2.1	342	14	81.3	3	546	17	237.1	8.6	15.23	0.54	297.3	8.8	47.8	1.5	288.9	8.9	50	1.5	107.2	3.4	10.55	0.35	51.6	1.7	5.82	0.19	4.53	0.56	3.25	0.12	1029.7	0.400155
FJW14_41_81	1787	48	143.6	4.8	2554	84	211.1	8.3	717	28	124.3	4.8	664	26	282	10	19.45	0.77	352	12	66.2	2.8	463	16	95.2	3.1	274.9	8.1	37	1.2	210.5	7.7	24.7	0.77	23.1	1.4	104.1	5	1716.4	0.0562255
FJW14_41_82	55.9	2.4	518	16	127.1	5.7	291	13	613	30	66.6	2.4	238	10	40.3	1.9	7.62	0.36	30.3	1.3	4.01	0.2	23.8	1	4.6	0.18	11.88	0.58	1.545	0.098	8.57	0.5	1.105	0.051	29.2	1.4	12.42	0.35	1208.6	4.07553
FJW14_41_83	470	12	414	11	863	32	1026	40	2880	130	421	17	1934	96	364	14	25.76	0.76	289.1	9.2	33.9	1.3	180.9	5.4	32.5	1.2	78.7	2.3	8.69	0.37	48.6	1.6	6.05	0.21	15.34	0.86	9.47	0.24	6261	0.479722
FJW14_41_84	1632	56	708	31	978	42	120.4	4.7	401	19	70.2	2.7	417	17	141.5	6.5	29.2	1.1	203.8	6.9	33.6	1.2	210.8	7.7	38.2	1.1	90.3	3.4	11.37	0.45	63.2	2.8	7.98	0.26	3.77	0.28	2.01	0.11	1008.6	0.723926
FJW14_41_85	147	12	630	23	426	29	17.6	1.6	81.8	5	19.6	1.5	159.3	7.8	70.2	3.4	29.5	2.1	108	4.7	14.29	0.65	82.9	2.4	15.51	0.87	37.3	1.2	4.58	0.3	24.2	1.1	3.23	0.17	0.33	0.12	2.84	0.14	278.3	1.47887
FJW14_41_86	773	21	165	4.9	1847	64	17.8	7.8	47	17	8.9	2.2	55.2	8.8	35.7	2.8	21.66	0.75	121.1	5.8	31.9	1.2	301	11	70.2	2.7	200.2	7.7	27.31	0.95	173.7	6.6	21.66	0.75	8.7	2.9	31.2	1.5	128.9	0.0893341
FJW14_41_87	1272	30	200	16	3760	220	351	22	1188	64	216	11	1139	44	573	28	24.4	1.2	766	34	129.1	6.5	727	41	115.9	5.8	274	15	35.4	2.1	202	11	24.9	1.5	52.1	3.6	10.6	0.95	2894	0.0531915
FJW14_41_88	242.7	4	651	13	347	11	6.97	0.4	32.4	1.1	7.24	0.3	56.5	2.4	34.8	1.3	10.24	0.34	59.2	1.9	9	0.31	58.9	1.8	11.8	0.32	32	1.1	4.3	0.13	26	1	4.19	0.14	0.534	0.087	3.47	0.21	103.11	1.87608
FJW14_41_89	371	16	1665	51	533	28	394	23	1581	96	255	15	1159	74	239	15	34.6	2	178	10	21	1.1	114.6	6.2	19.6	1.1	47.5	2.9	5.73	0.33	32	1.5	4.16	0.25	10.74	0.48	7.37	0.39	3389	3.12383
FJW14_41_90	600	20	418	15	210.1	7.5	271	18	312	13	29.1	1.6	116.4	6.2	19.7	1.3	5.16	0.24	23.76	0.98	3.43	0.13	26.4	1.1	7.09	0.28	27.6	1.1	5.19	0.23	42.4	1.8	7.99	0.23	74.6	2.5	19.01	0.56	728.5	1.98953
FJW14_41_91	602	19	419	15	205	12	133	16	170	21	15.5	2	65	8.1	13.6	1.4	3.81	0.4	17.3	1.5	2.84	0.21	23.6	1.4	6.71	0.4	28	1.6	5.4	0.32	44.4	2	8.29	0.46	63.7	4.6	16.13	0.98	383.5	2.0439
FJW14_41_92	402	11	651	39	2730	100	926	37	4070	150	766	30	4280	150	1074	32	48	1.7	856	29	102	3.2	567	17	102.7	4.2	262.3	9.3	35.1	1.3	210.4	7.4	29	1	80.2	4.5	57.2	2.4	10042	0.238462
FJW14_41_93	238	10	259	19	2021	71	42.3	2.2	327	19	86	4.4	621	27	277	10	12.69	0.48	345	15	57.5	2.3	383	17	77.2	3.2	209.3	8.4	27.7	1.2	155.7	6.2	20.57	0.74	1.62	0.31	17.69	0.65	1076.3	0.128154
FJW14_41_94	488	20	1197	45	231	12	64.7	4.3	222	17	37.9	3	230	16	60.8	3.5	17.1	0.88	60.2	3.3	7.25	0.37	41	2	8.18	0.42	21.96	0.94	2.98	0.17	17.9	0.96	3.02	0.13	5.02	0.67	12.72	0.95	554.6	5.18182
FJW14_41_95	495	15	339	12	2845	94	836	37	2830	100	467	19	2470	100	654	26	29.5	1.1	620	22	88.3	3.4	561	17	105.1	4.1	278.1	9.6	34	1.1	183.4	6.4	22.97	0.81	27.2	1.3	144.9	4.1	6603	0.119156
FJW14_41_96	381	12	495	16	307	14	517	29	1426	69	164.5	8.1	679	34	111.8	4.3	30.1	1	77.2	2.7	9.57	0.4	54.8	2.1	10.47	0.32	28.7	1.2	4.15	0.22	27.7	1.3	4.24	0.2	118.9	5.4	113.6	5.1	2786.5	1.61238
FJW14_41_97	533	17	953	69	472	18	25.8	2	92.6	6.1	18.7	1.3	124.1	6.1	52.4	2.3	9.41	0.48	74.3	3.4	12.54	0.49	84.6	4.9	17.84	0.68	51	1.8	6.5	0.43	37.9	2	5.49	0.29	5.7	1.2	20.36	0.83	261.2	2.01907
FJW14_41_98	451	15	102.4	3.6	1818	60	18	1	65.5	2	12.06	0.61	75	3.1	39.6	1.8	2.81	0.15	70.4	2.9	17.99	0.68	187.9	6.5	57.7	2.1	221.3	5.9	34.8	1	215.6	8.5	25.97	0.74	4.61	0.46	23	1.2	170.56	0.0563256
FJW14_41_99	269.6	9.9	342	12	933	38	55.3	3.1	226.1	8.1	41.5	2.1	267	14	140.3	5.8	24.24	0.9	262	10	50.7	2	288	10	38.1	1.6	78.3	2.4	7.96	0.36	38.6	1.7	4.8	0.24	0.54	0.14	22.7	0.73	589.9	0.366559
FJW14_41_100	427	12	276.2	8.9	1075	41	23	1.1	81.9	3.5	16.16	0.73	117.7	4.5	79.5	2.7	35.1	1.2	165.9	5.7	29.3	0.95	193.7	7.3	38.5	1.3	100.3	3.4	12.94	0.46	72.9	2.7	10.36	0.42	11.9	0.57	62.5	2.3	238.76	0.25693
FJW14_41_101	409	12	407	11	750	26	20.3	1	65.4	2.8	13.19	0.92	94	3.6	57.6	2.3	25.37	0.68	118.5	3.8	19.8	0.58	132.6	3.3	26.61	0.8	74.4	1.8	9.14	0.33	51.8	1.7	7.62	0.23	14.7	2.1	37.3	1.3	192.89	0.542667
FJW14_41_102	744	27	101.5	4.1	1937	96	72.7	4.1	260	16	48.2	3	298	19	137.4	7.8	22.8	1.1	229	13	44.4	2.2	320	16	65.4	3.1	184.1	7.9	23.8	1	127.6	6.3	16.95	0.93	12.6	1.1	21.2	1.3	678.9	0.0524006
FJW14_41_103	744	38	102.8	5.9	1295	52	52.4	2.8	176	12	31.3	2.2	199	11	90.7	4.9	15.65	0.94	155.7	6.4	30.9	1.3	216	10	47.3	2	123.8	6.4	15.28	0.65	87.7	5.7	11.59	0.5	6.98	0.52	13.11	0.66	458.7	0.0793822
FJW14_41_104	474	16	281	14	105.2	3.2	9.77	0.45	27.6	1.2	4.35	0.22	26.1	1.3	11.02	0.7	5.78	0.19	19.03	0.82	2.88	0.12	17.85	0.66	3.64	0.14	9.53	0.38	1.169	0.051	7.01	0.32	1.194	0.041	0.325	0.074	1.343	0.045	67.82	2.6711
FJW14_41_105	511	14	252.3	8.8	713	27	40.4	1.3	131.1	4.8	22.99	0.77	146.6	5.6	69.9	3.1	29.4	1	117.8	3.8	18.21	0.58	123.2	3.6	24.36	0.75	67.2	2.3	8.52	0.28	53.8	1.7	8.29	0.27	13.36	0.55	28.56	0.85	341.09	0.353857
FJW14_41_106	632	19	199.3	8.4	800	33	35.1	1.3	194.8	6.5	40.8	1.3	276	11	136.5	4.3	12.78	0.37	206.2	6.3	33.9	1.2	195.6	6.3	30.86	0.96	61.9	1.8	6.36	0.22	30.53	0.93	3.26	0.11	1.59	0.49	9.12	0.26	546.7	0.249125
FJW14_41_107	92.8	3.2	701	23	405	11	161.2	7	623	24	119	4.7	726	23	227.1	8.4	55.6	1.6	219.7	7.3	21.97	0.71	100.3	3.6	14.7	0.51	31.4	1.1	3.34	0.12	17.47	0.68	2.251	0.084	10.59	0.49	28.38	0.72	1629.2	1.73086
FJW14_41_108	304	11	522	15	1501	46	701	25	2288	81	383	15	2090	88	465	13	113.3	3.4	406	13	50.1	1.7	290.9	9.8	54.8	1.6	148.3	4.4	20.31	0.65	121.8	3.8	18.31	0.62	84.9	6.4	309	9.7	5462	0.347768
FJW14_41_109	429	14	488	19	1099	35	23.22	0.92	76.5	3.1	12.78	0.49	74.1	3.2	35.5	1.6	15.33	0.41	74.2	2.2	15.6	0.46	131	4	33.8	1.1	109.3	3.1	16.37	0.55	101.5	2.1	16.99	0.51	7.21	0.71	14.05	0.34	186.6	0.44404
FJW14_41_110	394	12	355	14	972	33	195	18	854	55	148.8	7.8	834	41	233.3	8.2	5.52	0.2	249.3	8.3	33.4	1.2	202.5	5.9	36.8	1	93.2	3.2	10.67	0.4	55.9	2	6.83	0.21	8.07	0.47	29.73	0.83	2031.8	0.365226
FJW14_41_111	431	18	394	15	398	22	227.7	9.6	670	40	98.8	4.1	449	19	87.2	5.3	18.44	0.96	86.6	3.3	11.04	0.48	67.9	2.7	15.04	0.85	42.2	1.9	5.7	0.33	36.2	1.6	6.21	0.38	14.8	1.1	11.5	0.54	1445.5	0.98995
FJW14_41_112	236.3	6	277	11	1627	59	80.9	3.5	301	11	53.1	2.1	342	13	170.8	5.8	30.7	1.2	288.1	9.9	58.6	1.6	394	14	57.2	1.8	95	3.4	7.58	0.26	27.5	1.2	2.323	0.078	22.1	1.2	184.5	7.6	777	0.170252
FJW14_41_113	440	11	450	23	519	18	79.6	2.9	242.2	7.5	37.7	1.3	213.2	7.5	68.5	2.4	13.54	0.39	94.3	3.2	14.49	0.47	93.4	2.8	19.5	0.68	51.8	1.8	6.55	0.3	39.1	1.6	5.68	0.17	17.05	0.77	5.87	0.21	572.7	0.867052
FJW14_41_114	790	22	529	20	1098	64	1395	63	4050	190	554	26	2560	100	507	21	33.2	1.5	394	17	44.5	1.9	234	10	40.7	1.7	102.1	4.5	11.7	0.56	63	2.6	8.26	0.36	25.8	2.5	9.48	0.75	8559	0.481785
FJW14_41_115	389	11	720	31	391	12	150.2	7.9	424	12	58.2	2	317	11	82.2	3.6	17.98	0.99	89.4	3.9	11.5	0.37	74.2	2.5	14.29	0.6	37.5	1.3	4.55	0.2	26.08	0.87	3.6	0.18	6.42	0.52	2.214	0.08	949.4	1.84143
FJW14_41_116	627	27	297	14	245	25	16	1.6	58	5.5	11.6	1.2	69.9	9.2	24	2.2	6.35	0.78	36.4	4.3	5.37	0.66	34.8	4.1	8.2	1.1	24.2	2.4	3.47	0.39	24.3	2.6	4.4	0.52	2.2	0.76	1.21	0.23	155.5	1.21224
FJW14_41_117	183.9	6.7	201	8	767	30	26.2	1.1	116.2	5.5	23.7	0.94	177.4	6.8	96	3.5	11.68	0.42	190	6.3	33.4	1.1	194.7	5.6	29.04	0.8	52.3	1.5	4.56	0.16	21.99	0.94	2.587	0.094	0.706	0.077	23.55	0.67	343.5	0.26206
FJW14_41_118	545	15	462	21	749	26	56.1	2.1	226.6	8.3	43.6	1.5	261	11	126.9	4.4	23.11	0.79	194.3	5.9	33.1	1.2	203.5	7.4	33.2	1.1	73	2.8	7.97	0.33	39.3	1.2	4.15	0.17	25.6	2	30.76	0.95	587.3	0.616822
FJW14_41_119	1379	44	218	8.1	556	18	37.5	1.4	167.2	5.4	30.1	1	174.3	7	84.6	2.6	27.2	1.1	122.8	4.2	21.74	0.63	137.3	4.2	22.83	0.71	54.7	1.7	6.58	0.25	37.1	1.3	4.3	0.13	1.12	0.16	5.66	0.16	409.1	0.392086
FJW14_41_120	197.1	8.7	1265	55	93.9	3.7	396	13	539	22	46.9	2.2	184.5	7.7	28.7	1.7	6.82	0.32	26.1	1.4	2.91	0.16	16.29	0.89	3.1	0.17	8.57	0.51	1.052	0.055	6.3	0.34	0.99	0.06	20.4	1	5.57	0.19	1166.4	13.4718
FJW14_41_121	395	12	615	20	208.1	8.2	1451	53	2849	89	266	11	892	37	95.7	3.6	18.77	0.74	64.6	3	6.7	0.28	35.4	1.4	6.53	0.3	17.84	0.67	2.332	0.099	15.57	0.77	2.44	0.12	90.4	3.9	20.41	0.63	5458	2.95531
FJW14_41_122	449	14	421	16	1362	58	137.2	4.8	598	28	115.4	4.5	745	25	232.6	7	35.6	1.1	272.9	8.7	38.5	1.4	242.4	9	49.8	1.6	134.8	4.6	16.94	0.67	99.8	3.3	14.08	0.46	12.53	0.61	66.7	2.2	1595.6	0.309104
FJW14_41_123	781	11	114.7	5.6	2271	37	97.5	2.3	316.7	5.9	50.41	0.99	279.6	5.5	137.2	2.8	3.79	0.26	233.3	6	53.1	1	400.8	7.6	74.4	1.5	180.5	3.3	20.39	0.45	97.7	1.8	10.49	0.23	2.82	0.3	4.59	0.25	744.21	0.0505064
FJW14_41_124	1081	38	136.4	5.8	1937	62	166.5	7.7	644	31	108.5	4.2	643	24	276	11	15.46	0.6	360	13	64.5	2	415	16	77.6	2.2	187.5	7.3	23.85	0.85	128.1	6.6	15.68	0.6	1.32	0.13	55.7	1.4	1562	0.0704182
FJW14_41_125	145.5	4.7	280	10	840	29	83.9	3.2	511	19	105.9	4.5	691	22	211.9	6.8	10.72	0.37	224.8	6.7	30.8	1	179.6	5.2	33.2	1	85.6	2.6	9.86	0.37	53.7	2	7.44	0.26	7.25	0.37	30.35	0.8	1391.8	0.333333
FJW14_41_126	265	10	6010	210	653	23	362	14	1556	53	299	12	1686	66	361	10	83.9	2.7	230.9	7.5	23.03	0.75	118	4.1	21.15	0.75	54.8	1.8	6.89	0.25	43.8	1.8	6.86	0.19	102.5	3.6	14.73	0.48	3903	9.20368
FJW14_41_127	313	16	860	55	886	65	157.8	8.7	424	25	71.3	4.1	319	18	82	4.2	11.1	0.51	126.2	6.2	27	1.4	176	11	33.4	2.1	88.9	4.4	10.96	0.84	59	5.3	8.52	0.53	11.14	0.81	5.86	0.29	972.1	0.970655
Laikeng Formation, siltstone, late Cryogenian, N 25°41'44.1", 116°08'17.4"
FJW14_45_1	352	12	367	14	206.6	7.9	417	25	982	42	112	3.6	412	18	67.5	2.9	14.65	0.55	57.7	1.8	6.74	0.27	40.2	1.2	7.65	0.24	20.19	0.88	2.645	0.09	16.42	0.68	2.55	0.1	56.5	2.1	39.4	1.1	1923	1.77638		LM	43
FJW14_45_2	606	24	593	19	788	24	240	9.2	731	29	117.9	4.1	688	28	188.2	6.5	42.5	1.3	211.9	7.3	28.83	0.94	166.4	5	31	1	73.3	2.3	8.23	0.3	43.8	1.4	5.38	0.19	3.65	0.2	1.318	0.041	1776.9	0.752538		HM	25
FJW14_45_3	400	12	241.5	8.4	1963	65	77.3	2.9	252.9	9.6	45.7	1.7	282	10	121.9	4.8	14.89	0.52	209.1	6.4	40.8	1.5	306	10	68.3	2	195.2	7.1	25.39	0.83	147.4	4.8	18.44	0.61	15.93	0.97	2.71	0.12	657.9	0.123026		S	8
FJW14_45_4	276.3	7.8	469	15	268	12	1113	50	2390	110	256	13	981	47	134.2	5.6	15.7	0.66	97.9	3.6	10.68	0.49	55.7	2.2	10.26	0.36	25.1	1.1	3.14	0.19	17.88	0.56	2.43	0.11	29.7	1.4	12.08	0.65	4740	1.75		ALK	2
FJW14_45_5	2042	63	245.9	9.9	694	20	50.5	1.9	187.1	5.9	31.9	1.4	194.2	7.3	90.9	3.5	12.15	0.55	139	4.6	26.27	0.77	169.8	5.8	28.5	0.92	66.7	1.9	7.55	0.3	40	1.6	4.41	0.11	0.448	0.051	16.76	0.49	463.7	0.354323		UM	7
FJW14_45_6	641	26	347	14	2068	85	95.3	4.7	354	14	70	3.1	500	21	224.9	9.6	18.35	0.91	363	14	62.6	2.3	416	16	80.5	3.6	211.3	7.5	27.4	1.3	165.2	7.6	22.15	0.86	7.45	0.82	19.16	0.94	1019.3	0.167795		IM	47
FJW14_45_7	807	23	249.9	7.8	651	25	2.86	0.17	17.74	0.69	6.34	0.29	70.1	3.2	51.3	2.2	12.97	0.57	95.5	3	16.32	0.48	113.6	4.6	22.67	0.87	65.3	2.6	8.95	0.33	55.6	1.5	8.52	0.26	0.444	0.058	7.34	0.31	97.04	0.383871
FJW14_45_8	420	15	580	16	2253	78	313	14	926	41	140.2	5.7	721	30	260.1	8	16.52	0.67	360	12	67.3	1.7	441	13	76.1	2.4	174.9	7.3	19.3	0.76	84.5	3.4	8.16	0.31	31.5	2	23.6	0.64	2100.2	0.257435
FJW14_45_9	280.9	6.8	344	11	1491	56	626	25	2433	87	384	16	1920	100	421	16	42.9	1.8	371	11	50	1.7	296	10	57.4	2	148.1	6.4	19.82	0.71	121.4	5.2	16.52	0.79	56.3	4.8	41.9	2.1	5363	0.230718
FJW14_45_10	275	10	265.3	9.5	948	20	3.14	0.18	12.68	0.59	2.94	0.14	27	1.6	21.4	1	2.18	0.14	60.3	1.7	14.52	0.45	130.1	4.1	34.1	1.1	110.5	4	15.63	0.51	93.9	3.1	12.71	0.35	0.181	0.034	3.533	0.093	45.76	0.279852
FJW14_45_11	182.6	6.3	926	29	260	10	142.8	5	518	17	94.3	3.8	545	18	151.2	4.6	36.2	1.2	150.5	5.1	17.45	0.84	78.1	4.5	10.97	0.57	21.1	1.1	2.07	0.11	9.46	0.55	1.058	0.052	34	1.7	6.7	0.22	1300.1	3.56154
FJW14_45_12	574	16	333.2	9.1	2200	110	199.5	8.3	791	39	144.8	6.3	912	34	276	12	33.7	1.5	344	15	51	2.2	350	16	79.7	3.1	262	12	41.5	2	300	13	47.8	2.3	8.68	0.72	8.12	0.45	2047.3	0.151455
FJW14_45_13	368	13	151.1	6	220.9	8.2	26.46	0.98	72.2	3.9	12.1	0.78	65	3.1	27.5	1.4	9.6	0.3	45.7	1.8	7.71	0.3	48.9	2.4	7.61	0.29	15.74	0.76	1.56	0.12	6.83	0.46	0.73	0.057	0.64	0.14	8.02	0.31	175.76	0.68402
FJW14_45_14	396	11	978	35	548	17	386	14	1049	44	146.1	5	768	25	181	6.6	44.6	1.2	178.3	4.2	22.77	0.63	125.4	3.4	21.29	0.6	50.2	1.6	5.6	0.17	28.6	1	3.428	0.093	15.4	1.8	1.085	0.026	2349.1	1.78467
FJW14_45_15	1362	50	76.1	2.5	2011	86	106.6	4.2	414	20	78.3	2.9	483	21	230.6	9	17.01	0.62	319	11	60.3	2	403	11	75.8	2.2	201.5	7.8	24.32	0.7	131	5.2	15.05	0.41	1.55	0.11	8.09	0.26	1081.9	0.0378419
FJW14_45_16	494	18	364	14	968	33	657	24	1466	44	200	7.1	914	27	214	7.3	30.3	1.2	229.6	6.3	31.8	1.1	180.7	5.3	33.9	1.1	83.4	2.6	10.05	0.36	53.2	2.1	6.05	0.24	11.01	0.94	2.042	0.071	3237	0.376033
FJW14_45_17	710	27	155.4	4	1072	30	101.3	3.5	275.2	9.8	42.5	1.8	249.2	7.9	115	3.6	5.31	0.2	190.5	7.6	40.3	1.3	274	11	42.6	1.1	79.2	2.4	7.06	0.23	27.43	0.92	2.91	0.11	4.1	0.19	23.01	0.66	668.2	0.144963
FJW14_45_18	344.5	8.5	1430	34	183.9	4.5	590	17	1383	42	151.6	5.8	587	17	79	2.5	19.13	0.83	57.6	2.9	6.61	0.21	35.1	1.4	6.37	0.27	16.22	0.74	2.18	0.12	13.08	0.87	2.12	0.12	21.3	1.4	9.53	0.57	2711.6	7.77597
FJW14_45_19	731	48	1306	56	193.2	8	535	28	1259	65	147.8	8.6	561	32	80.6	3.2	20.67	0.72	62.2	3.7	7.27	0.55	37.2	2.1	6.42	0.37	17.35	0.85	2.2	0.15	12.71	0.79	2.16	0.1	25.2	1	10.79	0.7	2502.8	6.75983
FJW14_45_20	381	11	396	13	1150	36	379	15	1516	57	247.5	8.5	1374	49	303.1	9.7	21.85	0.75	264	6.7	35.5	1.2	209.9	6.7	40.8	1.2	110.8	3.7	14.81	0.61	92.4	3.6	12.83	0.41	38.8	1.6	27.4	1.2	3516.5	0.344348
FJW14_45_21	244	7.1	260.6	6.3	13220	350	4010	170	11440	340	1648	52	8110	280	2077	61	283.9	7.2	2279	66	352	10	2248	67	446	11	1222	30	158.3	4.8	854	28	94	2	81.6	2.7	20.05	0.52	25208	0.0197126
FJW14_45_22	1026	57	373	25	1780	71	174	10	657	32	111	5.3	598	29	237	10	21.4	1	310	13	56.6	2.1	387	15	72.2	3.1	185.2	7.7	23	1.1	129.3	4.2	16.09	0.7	13.34	0.67	17.46	0.71	1540	0.209551
FJW14_45_23	322	11	412	19	2880	130	16.66	0.9	101.6	3.9	29.1	1.3	273	11	192.6	7.7	23.6	1.1	395	15	72.7	2.5	510	18	106.9	3.9	299.7	9.9	35.7	1.2	198.7	7.2	27.82	0.85	26.5	2.5	26.51	0.66	420.36	0.143056
FJW14_45_24	332	11	153.2	4.6	602	17	0.813	0.096	6.85	0.31	2.35	0.15	26.3	1.2	26.1	1.1	3.07	0.12	66.4	2	13.85	0.37	101.8	2.8	22.83	0.53	65.7	1.8	7.99	0.28	42.8	1.3	6.39	0.18	0.0088	0.0075	0.956	0.027	36.313	0.254485
FJW14_45_25	365	13	987	27	5560	200	639	21	2556	97	436	18	2390	93	685	22	134.9	5	852	26	130.8	4.4	887	27	190.5	6.2	563	19	74.8	2	438	14	53.7	1.5	85.4	3.9	31.93	0.83	6021	0.177518
FJW14_45_26	1841	63	119.7	5.4	739	24	60.8	2.2	220	10	37.1	1.6	210.1	8.8	90.3	3	8.98	0.3	140.5	4.8	25.61	0.84	172.5	5.5	29.3	1.1	75.9	2.9	9.88	0.37	58.2	1.7	7.37	0.22	0.64	0.084	13.93	0.41	528	0.161976
FJW14_45_27	414	13	582	21	1090	53	16.8	0.92	80.1	3.5	18.46	0.87	159.6	6	101.2	4.3	28.6	1	189.4	5.4	31.8	1.3	214.4	6.8	41.4	1.3	102	3.4	11.5	0.49	57.6	2.6	7.35	0.27	0.566	0.086	4.16	0.17	274.96	0.533945
FJW14_45_28	430	14	437	15	2087	69	10.28	0.53	36.8	1.4	7.18	0.36	57.4	3	52.4	2	7.57	0.29	170.3	4.8	39.4	1.1	332.9	9.9	78.9	1.9	230.7	6.2	29.71	0.97	165.5	5.1	20.91	0.55	1.78	0.14	18.12	0.43	111.66	0.209391
FJW14_45_29	375	12	231.9	7.4	906	26	332	12	1217	45	200.8	8.6	1126	56	286	10	34.5	1.6	272	12	34.1	1.3	191.1	7.9	33.7	1.1	86.2	3.5	10.43	0.38	56.8	1.8	7.75	0.26	25.2	1.3	61.3	2.5	2875.8	0.25596
FJW14_45_30	694	20	316	20	845	29	739	24	2001	74	294	12	1476	43	348	13	15.57	0.79	321	12	38.4	1.2	202.1	7.5	35.8	1.2	82	2.7	9.12	0.31	45.2	1.5	5.51	0.16	21.36	0.84	10.89	0.22	4510	0.373964
FJW14_45_31	301.5	9.2	606	18	88.4	2.9	149.6	4.5	370	14	41.6	1.7	186.4	5.6	33.5	1.1	8.82	0.28	32.6	1.1	3.67	0.15	19.23	0.68	3.33	0.11	8.13	0.33	0.909	0.063	5.06	0.25	0.803	0.039	5.1	0.22	8.03	0.21	747.6	6.8552
FJW14_45_32	317	14	178	10	3210	180	306	18	1222	64	215	14	1239	58	488	24	6.3	0.5	606	35	102.9	5.3	632	33	119.2	6.3	311	15	36.9	1.8	198	12	23.7	1.4	9.6	5.4	2.07	0.16	2982	0.0554517
FJW14_45_33	346	13	186.3	9.8	2019	96	174.3	7.3	686	30	120.6	5.2	735	27	242.3	9.5	59.9	2.6	314	11	49.2	1.9	331	11	71.1	2.8	217.7	7.8	29.8	1	183.5	6.6	26.94	0.8	21.1	1.5	107.4	4.6	1715.9	0.0922734
FJW14_45_34	255.5	7.5	373	12	65.5	2.6	2.13	0.14	7.64	0.38	1.354	0.096	9.06	0.67	4.61	0.35	1.292	0.084	8.97	0.55	1.739	0.089	12.63	0.58	2.52	0.13	7.89	0.37	1.18	0.06	8.12	0.44	1.264	0.065	0.204	0.037	1.376	0.094	20.184	5.69466
FJW14_45_35	466	15	3670	120	327	10	1525	70	3490	120	434	15	1668	58	243.9	7.5	58	1.7	152.3	4.7	16.67	0.52	79.9	2.6	12.55	0.36	28.34	0.86	3.24	0.15	17.57	0.47	2.236	0.08	118.1	4.5	20.49	0.46	7117	11.2232
FJW14_45_36	397	13	897	35	209.9	8.8	298	10	995	36	143.8	4.7	685	22	105.3	4.4	26.2	0.85	77.4	2.8	7.92	0.35	40.9	1.5	7.22	0.29	18.67	0.75	2.36	0.11	13.84	0.71	2.22	0.073	8.36	0.57	9.74	0.35	2121.8	4.27346
FJW14_45_37	317	10	84.4	2.4	2210	110	269	14	1101	49	207.3	8.2	1295	62	465	20	55.1	2.2	581	22	80	3.2	466	21	81.9	3.7	182.7	7.8	19.43	0.93	94.7	4.4	11.34	0.51	97.6	6.6	137.1	9	2872.3	0.03819
FJW14_45_38	371	13	708	19	102.8	3.6	108.9	3.7	238	11	26.74	0.94	114.6	4	23.24	0.95	9.84	0.38	22.62	0.97	2.71	0.1	16.56	0.6	3.36	0.12	8.79	0.4	1.162	0.061	7.49	0.34	1.194	0.057	8.63	0.42	63.6	1.6	488.24	6.88716
FJW14_45_39	595	16	161.7	5.6	839	24	806	34	1929	71	229.3	7.3	962	41	186.4	5.7	10.7	0.47	177.5	5.7	24.66	0.72	153	4.7	28.7	0.79	81	2.6	10.42	0.36	63.4	2.8	8.59	0.26	13.82	0.6	13.3	0.39	3926.3	0.192729
FJW14_45_40	369	12	108.5	5.1	1905	96	621	32	1777	96	261	14	1196	62	303	17	66.2	3.4	320	18	45.1	2.3	284	13	60.1	2.6	173.6	7.9	22.91	0.95	147.5	6.6	23.2	1	66.5	5.9	42.2	2.7	3855	0.0569554
FJW14_45_41	522	17	601	24	586	25	396	16	967	38	132	5.2	641	22	153.4	5.2	28.8	1.1	154.8	7	19.91	0.75	116.3	4.3	21.22	0.71	51.9	1.9	5.97	0.29	33.5	1.3	4.27	0.15	7.7	0.38	2.233	0.079	2136	1.0256
FJW14_45_42	704	28	223.7	9.2	642	36	44.3	2.3	181	8.9	32.7	1.8	209	11	114.8	5	19.39	0.82	213	11	39.2	2.2	197.1	9.7	23.9	1.3	37.7	2.6	3.06	0.21	12.8	1.2	1.37	0.15	0.721	0.095	16.05	0.74	467	0.348442
FJW14_45_43	2791	94	132.9	4.5	1822	75	222.9	9.2	651	28	90.5	3.7	439	18	195.6	6	11.9	0.44	277.1	9.2	54.4	1.7	356	13	62.7	2.1	157.7	5.4	21.41	0.86	121.3	4	14.24	0.46	2.72	0.17	7.61	0.24	1403.4	0.0729418
FJW14_45_44	295.5	8.2	820	19	500	24	119.4	4.3	353	17	55.1	2.3	305	14	88.4	2.9	13.64	0.49	95.7	3.3	14.02	0.44	87.3	2.7	17.5	0.56	49	2.1	7.06	0.17	43.6	1.6	7.24	0.28	11.15	0.78	12.01	0.42	832.5	1.64
FJW14_45_45	2878	82	227.4	7.2	1232	40	119.8	4	505	20	85.2	3.1	487	14	207.5	7.2	27.2	1	278.4	7.3	50.8	1.4	321.2	8.7	50.3	1.4	97.8	3.5	9.68	0.33	46.2	1.4	4.56	0.17	0.317	0.052	56.3	1.4	1197	0.184578
FJW14_45_46	216.8	6.8	453	18	2107	89	32.4	3.5	152	13	36	2.2	287	14	186.1	6.8	23.1	1.7	335	11	60.4	1.6	409	15	80.5	2.5	216.2	7	25.42	0.94	137.5	5.1	16.89	0.51	31.1	4.8	31.3	1.2	507.4	0.214998
FJW14_45_47	398	13	7220	290	319	13	1512	59	3600	140	411	17	1657	63	281.4	9	77	2.2	195.5	6.4	21.07	0.78	100.7	4.5	14.92	0.48	29.5	1.1	2.92	0.12	13.64	0.48	1.494	0.062	38.5	1.6	2.217	0.067	7180	22.6332
FJW14_45_48	1998	64	106.4	3.3	1713	65	20.05	0.73	103.7	3.1	23.4	1.1	167.3	6.2	104.1	3.2	16.32	0.54	192.1	5.1	43.1	1.4	312	10	60.5	1.5	158.7	5.3	21.1	0.58	121.4	3.5	15.85	0.45	0.019	0.012	22.94	0.5	314.45	0.0621133
FJW14_45_49	384	16	94.5	4.1	775	45	80.7	4.7	232	14	34.9	1.7	176	10	68.6	3.4	9.9	0.48	109.3	4.2	17.69	0.99	131.3	6.4	29	1.6	80.4	4.8	9.5	0.54	55.8	3.1	7.9	0.46	4.16	0.46	18.8	1.1	523.6	0.121935
FJW14_45_50	308.8	7.2	804	28	124.4	6.1	672	45	1019	46	99.1	4.2	435	27	63.4	3	7.01	0.34	55.8	3.3	5.48	0.25	28.6	1.4	5.26	0.26	12.85	0.79	1.403	0.08	9.01	0.81	1.293	0.074	45.3	1.6	10.66	0.41	2225.1	6.46302
FJW14_45_51	478	15	265	12	977	37	50.4	2.3	218	10	42.6	2.2	276	12	148.3	6.5	9.93	0.45	238.6	8.1	41.9	1.4	250	12	39.7	1.7	93.6	3.6	11.24	0.54	62.3	3	7.11	0.3	1.15	0.1	8.73	0.48	587	0.271238
FJW14_45_52	606	27	518	22	612	23	214	9.6	594	28	96	4.6	557	26	146.9	6.6	36.3	1.5	156.7	5.2	21.02	0.95	126.1	6.1	22.66	0.94	54.4	2.4	5.92	0.23	31.7	1.3	4.25	0.19	2.1	0.28	0.96	0.039	1461	0.846405
FJW14_45_53	382	16	516	51	1315	51	200	18	753	50	130.8	6.6	780	37	232.2	8.4	49.4	1.7	278.8	8.8	38.7	1.1	235.6	8	47.4	1.7	131.4	3.8	17.77	0.56	107.2	4	16.55	0.52	31.6	4	42.2	1.3	1863.8	0.392395
FJW14_45_54	187.7	8.1	1218	54	217	14	447	28	1232	77	162.6	9.2	749	33	127.8	7.2	17.87	0.91	89.8	4.2	9.39	0.45	48.1	2.2	8.8	0.51	20.7	1.1	2.55	0.18	13.7	1	1.714	0.09	53	2.4	24.51	0.89	2590.6	5.6129
FJW14_45_55	342	12	458	20	177.2	9.8	520	29	859	47	73.8	3.9	282	14	47.5	2	9.16	0.43	51.3	2.6	6.61	0.3	36.1	1.3	6.58	0.21	15.66	0.58	1.9	0.13	10.96	0.48	1.801	0.08	9.12	0.68	7.95	0.37	1734.8	2.58465
FJW14_45_56	441	16	656	25	661	25	343	15	923	44	134.6	5.8	669	34	167.9	8.9	32.7	1.2	169.6	6.3	22.9	0.98	134.2	5.7	24.8	1.1	61.9	2.1	7.38	0.33	42.9	1.7	4.99	0.17	7.47	0.84	1.763	0.06	2069.6	0.992436
FJW14_45_57	319	11	1134	46	89.6	3.3	148.8	6	359	14	44.1	1.9	198	6.9	36.5	1.6	9.59	0.42	29.9	1.5	3.24	0.13	18.11	0.89	3.44	0.16	8.39	0.38	1.022	0.072	6.52	0.26	1.088	0.065	9.01	0.51	17.83	0.62	749.9	12.6562
FJW14_45_58	230.2	7	280.4	9.8	888	25	45.9	1.8	204.7	6	38.1	1.3	237.6	7.8	123.2	4.5	23.9	0.73	198.3	5.7	37.47	0.96	218.9	5.8	35.1	1	74.1	2.6	6.76	0.26	29.5	1.1	2.78	0.1	1.25	0.14	27.59	0.78	526.3	0.315766
FJW14_45_59	352	12	556	17	155.1	5.1	44.7	1.5	154	5.3	26.4	1	157.6	5.5	49.4	2.1	14.34	0.52	52.7	2.1	6.13	0.2	31.8	1.3	5.8	0.22	13.49	0.46	1.48	0.063	8.29	0.32	1.251	0.041	11.51	0.51	16.2	0.42	382.7	3.58478
FJW14_45_60	626	25	300	13	382	14	3.62	0.22	17.69	0.87	3.79	0.3	29.1	1.8	18	1.4	7.4	0.28	31.8	1.9	6.18	0.3	50.3	2.5	12.02	0.49	40	1.7	6.25	0.28	45.3	2.2	8.05	0.35	0.99	0.11	12.68	0.46	54.2	0.78534
FJW14_45_61	342	11	270.7	8.6	1252	42	751	28	1787	47	236.8	7.9	1113	42	259	6.9	26.27	0.87	271.1	7.5	38.2	1.1	245.7	7.6	45.9	1.6	117.9	3.6	14.3	0.46	76.8	2.9	9.25	0.23	10.65	0.49	2.634	0.093	3887.8	0.216214
FJW14_45_62	282.9	9.7	454	15	443	27	115.2	8.7	402	30	65.1	4.6	366	24	98.3	5.6	76.9	4.5	105.7	5.6	13.49	0.72	79.6	4.5	15.93	0.97	40.3	2.2	4.91	0.25	29.7	1.5	4.43	0.22	21.9	1.3	14.51	0.58	948.3	1.02483
FJW14_45_63	965	29	255.5	7.7	783	31	4440	150	7850	240	647	22	1969	66	219.5	6	28.07	0.77	159.3	4.5	20.3	0.65	113.8	2.8	22.38	0.83	65.4	2.2	9.46	0.31	63.9	1.9	10.79	0.33	159.2	5.5	35.7	1	14906	0.326309
FJW14_45_64	277.6	9.4	192	7.5	2494	95	215.8	8.4	647	31	102	3.9	596	23	219	10	9.01	0.43	361	13	62.2	2.3	442	16	95.7	3.6	267.8	9.5	35.2	1.7	201	7.3	25.16	0.92	11.22	0.7	18.15	0.62	1560.8	0.0769848
FJW14_45_65	339	25	980	160	1162	59	970	60	2290	110	299	14	1444	81	327	19	41.6	1.7	331	14	43.9	1.8	250	10	44	1.7	101.9	4.6	11.06	0.5	59.3	3.6	6.54	0.45	9.21	0.89	1.218	0.087	5003	0.843373
FJW14_45_66	408	12	130.6	3.9	534	19	235.5	7.5	1013	39	182.6	6.8	1024	33	398	14	25.67	0.97	370	11	41.5	1.2	164.8	5	20.63	0.48	32.42	0.98	2.63	0.11	11.07	0.51	1.151	0.054	1.7	0.11	33.47	0.74	2455.1	0.244569
FJW14_45_67	845	37	209.6	7.8	1956	74	388	20	1511	68	281.6	9.9	1431	49	428	15	47.2	1.5	398	13	56.1	1.6	348	10	69.1	2.2	192.5	5.9	27	1	170.4	6.2	24.39	0.81	131.1	4.5	191.9	5.2	3611.6	0.107157
FJW14_45_68	143.8	6.5	548	23	528	23	13.85	0.69	54.1	2.9	10.5	0.72	69.6	3.2	37.4	2.2	15.69	0.5	76.1	3.8	13.91	0.77	91	4.8	18.29	0.62	53.1	1.6	6.91	0.36	41	1.9	5.45	0.21	2.81	0.41	17.4	1	148.05	1.03788
FJW14_45_69	399	24	166.8	9.8	674	33	217	15	902	55	153	11	782	52	359	17	6.38	0.41	465	24	73.8	3.4	280	15	24	1.1	25.5	2	1.39	0.11	4.34	0.34	0.349	0.026	0.169	0.066	46.8	1.9	2054	0.247478
FJW14_45_70	222.1	9.9	471	23	564	36	146.4	7.1	491	32	87.7	4.6	523	21	182.2	8	35.7	1.6	169.5	8.5	20.9	0.98	112.6	7.2	19.7	1.1	48.5	2	6	0.3	35.8	2.2	5.56	0.25	40.1	2.2	17.76	0.72	1248.1	0.835106
FJW14_45_71	325	11	922	33	51.1	1.8	53.8	2.3	151.6	6.4	21.57	0.81	106.6	4.9	19.9	1.1	5.22	0.33	18.06	0.74	2.24	0.14	12.59	0.56	1.861	0.08	4.42	0.29	0.537	0.036	2.76	0.22	0.39	0.024	0.72	0.12	3.54	0.3	333.57	18.0431
FJW14_45_72	110.4	5.1	474	18	125.8	5.2	39.9	1.5	95.8	3.6	15.13	0.73	80.8	3.7	24.8	1.3	6.11	0.29	31.6	1.4	4.95	0.21	29	1.1	4.84	0.22	11.47	0.5	1.378	0.077	6.98	0.3	0.806	0.04	12.6	1.3	21.3	1.1	231.63	3.76789
FJW14_45_73	91.1	4.1	409	20	322	12	169.4	6.5	462	19	62.6	2.4	319	14	77.7	3.4	15.5	0.64	87.1	2.9	12.85	0.51	72.2	2.6	12.38	0.52	30	1.1	3.62	0.15	19.66	0.79	2.397	0.091	108.6	4.9	143.6	5	1013	1.27019
FJW14_45_74	507	40	450	27	92.9	6.7	329	19	645	41	64.9	4.1	258	20	38.9	1.9	7.15	0.35	31.8	1.1	3.4	0.27	17.4	1.4	3.28	0.28	8.46	0.69	1.005	0.094	5.44	0.4	0.945	0.053	4.66	0.35	11.99	0.63	1296.9	4.84392
FJW14_45_75	514	15	269.4	9.5	2960	100	55	1.9	207.5	5	39.9	1.3	276.7	6.6	157.1	4.7	24.65	0.89	298	11	60.1	2	463	12	103.3	3	294.4	7.8	37.8	1.2	206.6	6.3	23.55	0.61	11.63	0.54	26.32	0.63	579.1	0.0910135
FJW14_45_76	505	20	289.5	9.6	1078	44	387	17	918	40	112.7	3.9	561	23	152	5.9	35.9	1.2	183.6	6.7	27	1	176.2	7.7	37.6	1.2	109.9	4.6	14.79	0.55	93.3	4.3	14.12	0.42	25.7	1.1	71.6	2.6	1978.7	0.268553
FJW14_45_77	338	12	1322	53	465	25	84.3	5.5	388	27	77.2	4	495	26	134.4	5.6	34.5	1.8	118.2	5.2	12.91	0.61	74.3	3.4	14.03	0.79	40	1.8	5.63	0.22	40.9	2	7	0.38	71.8	3.5	58.9	2.6	1044.5	2.84301
FJW14_45_78	197.2	6.3	135.1	4.9	450	16	90.5	3	444	15	84.8	3.7	563	21	315.7	9.9	11.45	0.45	436	14	50.9	1.5	186.8	5.9	17.08	0.7	20.79	0.75	1.306	0.085	4.07	0.21	0.322	0.024	0.143	0.045	5.35	0.14	1182.3	0.300222
FJW14_45_79	555	21	301	15	1080	46	12.48	0.73	51.5	2.4	12.06	0.72	101.2	3.2	71.6	2.3	11.68	0.37	130.5	3	25.6	0.91	189.8	6.2	39.9	1.4	113.1	4.1	16.5	0.69	108.2	3.1	14.45	0.48	8.92	0.74	27.5	1	177.24	0.278704
FJW14_45_80	646	32	671	36	356	21	75.7	5.1	278	13	45.8	3.2	286	13	77.8	4.1	15.88	0.77	89.2	3.9	11.13	0.51	64.4	3.3	12.77	0.63	34.6	1.9	4.27	0.37	24.8	1.6	3.81	0.24	0.377	0.088	2.08	0.1	685.5	1.88483
FJW14_45_81	2070	100	312	17	701	38	572	37	1540	100	205	15	976	89	217	16	16.1	1.3	207	14	24.3	1.3	133.5	8.2	23.8	1.2	61.3	3.6	7.29	0.4	43.5	3.2	6.2	0.26	21	2	18.65	0.93	3293	0.445078
FJW14_45_82	801	28	196.8	6	1098	40	75.6	3.3	313	15	57.5	2.6	324	12	133.4	5.5	13.89	0.46	182.9	4.9	31.83	0.99	229.5	7.3	46.8	1.5	128.6	3.3	17.51	0.59	90.7	3.2	10.15	0.28	1.93	0.21	15.19	0.37	770.1	0.179235
FJW14_45_83	488	25	324	21	102.7	6.8	5.66	0.34	20.4	2.2	3.5	0.28	25.3	2.6	12.6	1.2	4.47	0.25	27.6	1.3	5.06	0.34	28.9	1.4	4.42	0.23	9.77	0.7	1.147	0.063	6.81	0.56	0.626	0.064	5.15	0.62	15.7	1.6	54.86	3.15482
FJW14_45_84	354	13	5690	200	105.3	5.2	237	11	791	34	108.3	3.5	501	19	62.8	3.1	15.66	0.6	44.5	1.9	4.54	0.24	22.4	1.1	3.62	0.17	8.59	0.35	1.049	0.064	5.94	0.39	0.822	0.043	3.91	0.57	6.5	0.21	1637.3	54.0361
FJW14_45_85	479	36	704	68	418	41	1010	130	3110	350	389	21	1820	180	317	19	37.8	2.9	211	18	23.5	1.4	115	8.7	18	1.3	46.2	4.5	5.35	0.36	30.7	3	4.15	0.38	19.3	2.3	4.88	0.35	6329	1.68421
FJW14_45_86	297	17	1130	100	410	32	349	27	1050	67	157	10	791	42	201.9	7.9	43.7	1.9	235.8	9.6	29	1.9	137.6	9.7	19.2	1.3	36.6	2.7	3.15	0.27	14.8	1	1.68	0.12	40	3.5	1.351	0.089	2347	2.7561
FJW14_45_87	468	17	130.4	4.9	4120	150	289.5	9.5	1399	50	306	11	1908	75	768	25	18.51	0.78	866	26	130	3.8	826	26	149.5	4.7	367	11	40.8	1.7	207.5	7	24.2	0.71	3.13	0.18	49	1.3	3902.5	0.0316505
FJW14_45_88	366	12	102	3.2	1238	34	14.71	0.76	103.1	4.6	27.2	1.2	222.4	7.7	129.3	5.1	2.77	0.11	206.7	6.3	36.1	1.2	242.7	7.2	42.8	1.4	110.8	2.9	12.77	0.41	71.3	2.3	7.92	0.29	0.159	0.034	7.39	0.2	367.41	0.082391
FJW14_45_89	198	6.2	261	17	728	25	20.7	1.1	81.1	4.3	15.4	0.76	104.8	4	51.6	2.3	13.11	0.49	87.6	3.1	15.2	0.42	112.2	3	23.9	0.71	70.2	2	9.08	0.33	53.8	1.8	7.69	0.31	8.7	1.4	2.7	0.14	222	0.358516
FJW14_45_90	324	10	322	13	1448	70	102.8	6.8	334	16	58	3.2	339	15	133.7	6.5	34.2	1.7	174.9	8.1	28.4	1.3	201	10	44.9	2	137.8	6.6	18.91	0.94	117	4.4	17.52	0.62	28.1	1.5	19.89	0.83	833.8	0.222376
FJW14_45_91	222.3	7.2	254	11	94.4	4.6	8.63	0.45	39.3	1.8	6.83	0.25	40	1.6	12.46	0.76	4.41	0.19	15.63	0.57	2.46	0.12	16.21	0.81	3.28	0.17	9.16	0.35	1.301	0.074	8.25	0.44	1.24	0.051	0.369	0.06	2.409	0.076	94.76	2.69068
FJW14_45_92	210.7	7	183.8	8.5	1007	40	3.86	0.2	22.31	0.96	6.51	0.36	65.3	2.8	59.8	2.4	11.53	0.39	150.9	6.3	26.1	1.1	185.7	7.3	37.5	1.4	95.1	3.6	11.14	0.53	57.7	2.4	7.65	0.34	1.8	0.14	1.496	0.07	97.98	0.182522
FJW14_45_93	400	12	753	29	563	19	1179	39	2800	81	317	11	1340	59	212.5	7.1	18.36	0.61	153.1	5.7	18.43	0.62	102.9	3.6	19.87	0.64	54.6	1.9	7.52	0.29	47	2	6.45	0.22	27.3	1.4	12.11	0.37	5636	1.33748
FJW14_45_94	278.8	7.8	122.6	6.7	2631	91	1163	39	3230	130	416	15	1885	79	526	16	5.88	0.26	590	14	87.9	2.5	546	11	100.7	2.7	243.7	6.6	28.03	0.92	140.3	3.8	15.73	0.37	8.04	0.42	14.4	0.42	6694	0.0465983
FJW14_45_95	1452	61	160.6	8.7	2170	100	179.7	8.4	724	25	123.9	5.5	697	25	294.7	9.3	6.27	0.25	387	16	70	2.5	460	14	89.8	3.8	253.5	9	35.4	1.5	215.8	9.7	28.6	1.2	8.56	0.56	30.85	0.77	1724.6	0.0740092
FJW14_45_96	631	19	112.3	4.1	1414	48	29.6	1.2	87.8	3	16.74	0.67	115.2	5	60.2	2.1	7.31	0.28	123	3.5	26.09	0.74	211.2	7	47.6	1.4	136	4.5	17.05	0.61	98.2	3.6	12.7	0.37	0.099	0.025	2.427	0.067	249.34	0.0794201
FJW14_45_97	509	15	1215	35	773	28	806	32	2210	110	298	11	1432	51	324	13	38.1	1.3	260.7	8.8	32.8	1.1	177.9	7.3	29.64	0.8	74.8	2.9	9.43	0.42	54	2.1	7.28	0.22	17.39	0.72	58.7	1.7	4746	1.5718
FJW14_45_98	531	18	234.3	9.9	198	12	517	21	1502	68	203.7	7.5	919	47	167	7	24.5	1.4	96.7	4.4	8.72	0.61	39.6	2.4	5.69	0.44	12.51	0.89	1.38	0.1	7.88	0.65	0.993	0.087	375	20	107.1	7.6	3141.7	1.18333
FJW14_45_99	420	12	1678	60	383	12	2162	81	3910	130	369	13	1322	51	193.8	6.9	38.5	1.3	148.7	4.1	16.37	0.7	83.1	2.4	12.87	0.34	32.2	1.1	4.2	0.16	23.79	0.75	3.24	0.11	52.5	1.8	11.02	0.27	7763	4.3812
FJW14_45_100	793	24	842	35	297	20	157	10	540	31	83.8	5.7	461	26	106.7	5.8	30.8	1.2	100.1	1.8	12.13	0.75	65.9	2.9	11.44	0.41	27.8	1.7	3.12	0.21	17.53	0.77	2.63	0.11	7.65	0.42	4.39	0.23	1241.8	2.83502
FJW14_45_101	281	11	212.3	7.1	104.9	4.2	6.92	0.54	28.3	1.8	5.21	0.37	32.4	2.3	12.37	0.73	3.18	0.26	18.2	1	3.06	0.19	19.1	1.1	3.82	0.19	11.19	0.42	1.728	0.074	12.24	0.65	2.12	0.1	0.823	0.092	3.52	0.17	72.83	2.02383
FJW14_45_102	287.6	9.6	235.5	9.1	240	13	19.7	1.1	79.7	4.7	14.8	0.99	96.3	6.2	31.3	1.9	8.15	0.46	45.4	1.9	6.65	0.33	43.1	2	8.75	0.43	26.3	1.3	4.02	0.22	28.1	1.3	5.42	0.2	3.04	0.33	8.24	0.39	210.5	0.98125
FJW14_45_103	276.1	9.1	78.2	3.4	2133	85	136.4	5	598	29	124.3	5.1	809	26	389	18	8.27	0.27	532	18	81.7	2.6	482	16	80	2.5	170.9	5.1	16.71	0.56	76.3	2.6	8.49	0.25	2.14	0.2	19.7	1.1	1667.7	0.036662
FJW14_45_104	270	14	394	24	116	24	148.4	6.3	274	13	30.2	2	134	11	30.6	3.7	9.4	1.1	37.4	6	4.97	0.96	27	5.6	4.53	0.86	10.4	2.2	1.08	0.22	5.1	1	0.71	0.13	39	12	10.64	0.88	586.6	3.39655
FJW14_45_105	252.6	7.3	352	13	29.9	1.1	139.1	5.6	237.2	9.4	21.99	0.87	84.3	3.2	11.84	0.71	4.22	0.34	10.08	0.47	0.932	0.055	4.84	0.33	0.878	0.057	2.31	0.18	0.295	0.03	1.83	0.14	0.321	0.025	1.39	0.14	7.97	0.18	482.59	11.7726
FJW14_45_106	506	16	602	23	696	25	491	20	1201	39	164.8	5.7	853	33	196.5	5.8	42.4	1.3	189.7	5.8	23.73	0.69	140	3.9	24.53	0.89	58	2	6.79	0.27	36.9	1.3	4.68	0.16	6.26	0.35	2.268	0.082	2709.8	0.864943
FJW14_45_107	1522	55	335	11	1611	60	114.8	4.2	420	14	74.4	2.8	427	15	199.9	6.6	20.73	0.51	297.2	8.7	60.5	2	386	13	66.3	2.1	156.5	5.2	17.11	0.52	79.9	2.9	8.15	0.33	9.49	0.54	125.7	3.4	1036.2	0.207945
FJW14_45_108	950	31	339	12	131.1	4.7	71.4	3	288	10	49.7	2.1	259	11	53.2	2.3	20.21	0.82	41.5	1.4	4.85	0.19	26.35	0.81	4.66	0.15	12.19	0.48	1.542	0.07	9.36	0.44	1.405	0.057	0.96	0.18	8.86	0.23	668.1	2.58581
FJW14_45_109	298	10	854	41	285	11	226	10	704	27	86.2	3.9	362	15	77.4	3	12.63	0.42	84.3	3.3	11.41	0.45	62.7	2.2	10.57	0.38	24.28	0.92	2.75	0.11	15.67	0.74	2.105	0.085	2.4	0.16	19.3	1.1	1378.2	2.99649
FJW14_45_110	336	12	238.7	7.2	215	7.4	302	15	558	27	57.9	2.7	252	13	49.2	2.1	14.76	0.59	51	2.2	6.63	0.26	38.9	1.5	7.87	0.33	21.11	0.63	2.8	0.12	18.4	0.79	3.04	0.11	99.8	4.3	132.6	3.8	1169.9	1.11023
FJW14_45_111	321.2	9.8	316.2	9.9	1352	47	1356	55	3450	160	429	15	1876	86	385	15	25.1	1.3	344	12	43.9	1.4	261.7	8.9	49	1.4	128.9	4.3	15.76	0.56	88.1	3.4	11.91	0.41	66	6.2	8.09	0.25	7111	0.233876
FJW14_45_112	90.5	2.5	682	22	145	4.5	931	33	2294	85	296	10	1381	51	234.4	8.7	39.5	0.95	174.8	4.8	14.88	0.56	51.9	2	5.71	0.24	8.21	0.3	0.53	0.039	1.93	0.15	0.187	0.019	15.69	0.75	5.87	0.13	4902	4.70345
FJW14_45_113	224.3	6.7	334	14	2074	83	308	11	1561	75	298	11	1779	66	572	17	38.3	1.2	520	17	70.5	1.9	413	15	73.5	2.2	187.5	4.3	21.99	0.68	120.5	3.9	14.65	0.46	9.68	0.46	56.7	1.4	3946	0.161041
FJW14_45_114	234.3	8.2	306.3	8.9	1657	69	379	12	1381	42	225.1	8.2	1269	45	354	11	37.3	1.1	372.9	8.4	51	1.5	306	10	58.8	1.9	160.5	5.6	19.11	0.58	104.8	4	14.11	0.46	3.16	0.19	48.3	1	3254.1	0.184852
FJW14_45_115	3510	110	300	15	2128	84	245	18	1188	81	222	12	1227	60	335	14	12.45	0.51	277	11	44	1.5	323	12	68.1	2.9	195.2	7.7	23.45	0.81	111	3.9	11.54	0.47	0.502	0.098	9.48	0.46	2882	0.140977
FJW14_45_116	7830	280	115.1	7.9	1774	82	252	13	940	44	149.2	6.5	775	38	334	14	6.92	0.42	376	13	63.7	2.3	368	13	57	2.3	143.7	4.5	20	0.9	125.8	4.6	15.78	0.56	4.7	0.29	39.7	1.4	2116.2	0.0648816
FJW14_45_117	1235	48	289	11	910	37	59.5	2.5	239	10	43.6	2.1	265	12	126.6	5.3	17.64	0.66	202	6.9	38.1	1.2	248.5	7.2	38.6	1.5	87.1	2.4	10.62	0.41	61.5	2	7.54	0.27	0.77	0.26	26.15	0.8	607.1	0.317582
FJW14_45_118	125.3	5.1	892	33	220.5	9.1	1549	61	2750	110	296	13	1293	45	204.8	8	30.2	1.3	154.3	5.5	14.41	0.45	61.2	1.8	8.13	0.32	15.38	0.55	1.457	0.089	5.66	0.36	0.636	0.043	21.41	0.84	6.58	0.21	5888	4.04535
FJW14_45_119	675	24	112.3	3.8	788	47	13.16	0.98	101.7	5.1	29.6	2	273	12	214	12	6.73	0.57	308	14	45.5	2.1	226.9	9.4	30.8	1.4	59.5	2.9	6.2	0.36	34.3	1.6	4.11	0.16	0.077	0.034	4	0.23	417.46	0.142513
FJW14_45_120	479	16	468	20	1211	41	349	12	1111	41	167.3	6	929	41	306	11	9.1	0.36	328.9	8.7	43	1.3	248.6	8.6	45.9	1.4	118.7	3.2	14.38	0.39	77.9	2.5	9.06	0.26	17.63	0.85	14.12	0.36	2556.3	0.386457
FJW14_45_121	362	18	525	30	551	28	280	13	938	44	135.5	7.9	708	36	156.2	6.8	18.21	0.74	147.7	6	18.54	0.68	114.2	4.9	21.26	0.93	55.4	2.1	6.87	0.25	41	1.9	5.8	0.22	18.13	0.78	25.68	0.95	2061.5	0.952813
FJW14_45_122	647	23	466	18	592	34	167	11	500	30	82.3	5.3	450	25	146.2	7.1	15.9	1	154.2	9.1	19.5	1.1	104.9	6.3	19.13	0.9	48.4	2.4	5.39	0.3	31.7	1.5	4.27	0.22	12	2.6	6.62	0.39	1199.3	0.787162
FJW14_45_123	258	8	391	13	1082	42	317	48	930	130	137	16	764	72	221	16	22.6	1.4	248	11	34.9	1.4	209.5	8.1	40	1.3	101.1	3.6	11.86	0.37	63.7	2.2	8.22	0.27	63.3	5.3	23.9	1.3	2148	0.361368
FJW14_45_124	478	22	479	16	546	24	53.2	2.1	173.2	7.7	32.6	1.9	209.3	9.1	84	3.3	35.4	2	111.7	4.5	15.52	0.69	96.3	4.4	19.8	1	52.5	2	5.98	0.33	35.4	3	5.06	0.41	6.3	1.2	11.6	1.4	468.3	0.877289
FJW14_45_125	390	17	874	43	221.7	9.6	1342	59	2133	89	199	10	693	27	86.7	4.5	22.4	1.4	72	4.3	8.15	0.46	39.2	2.1	7.62	0.36	19.2	1.1	2.47	0.17	15.8	0.8	2.55	0.12	53.5	2.6	42.8	1.2	4367	3.94226
FJW14_45_126	142.5	5.4	1651	62	203.1	6.8	566	16	1929	63	308	11	1480	41	265.6	9	47.1	1.7	173.9	5.1	15.65	0.49	61.5	1.8	7.43	0.22	12.38	0.52	1.111	0.061	4.26	0.28	0.463	0.029	1.07	0.12	8.56	0.24	4283	8.129
FJW14_45_127	927	40	52.2	3	4080	210	479	26	1670	110	273	15	1457	74	724	36	17.36	0.9	934	51	155.3	8.7	981	42	170	9.5	389	19	43	2.5	202	11	21.11	0.94	21.2	1.7	20	1.1	3879	0.0127941
FJW14_45_128	244.7	9	435	14	428	18	175.4	5.7	404	14	54.2	2.2	269.6	8.6	86.4	2.6	19.27	0.78	104.8	3.5	14.88	0.54	89	3.1	17.06	0.56	44	1.4	5.34	0.19	31.4	1	4.47	0.2	9.31	0.5	31.3	0.8	903.2	1.01636
FJW14_45_129	921	40	333	15	615	28	33.1	1.8	167	11	30.7	1.9	190	10	99.3	3.7	16.39	0.76	143.1	6.8	25.7	1	163.8	6.8	27.5	1.1	65.1	3.2	7.79	0.43	40.3	1.7	4.76	0.26	0.486	0.083	8.7	0.36	420.8	0.541463
FJW14_45_130	876	28	75.2	2.8	2510	120	220.8	8.8	1024	32	205.5	7.1	1169	43	358	13	47.6	1.4	402	9.9	56.7	2	357	11	79.3	2.5	231.5	6.5	32.57	0.98	217.8	7.5	37.7	1	61.5	2.3	65.8	2.4	2619.3	0.0299602
FJW14_45_131	549	22	91.4	4.3	10760	540	715	49	1980	120	328	20	1950	120	912	43	29.1	1.2	1275	51	225	12	1601	66	335	17	961	34	140	7.7	935	48	126.4	5.3	150	13	41.2	2.5	4973	0.00849442
FJW14_45_132	1001	39	452	18	418	24	87.5	4.1	269	14	43.3	2.6	248	16	74.4	4.9	22.2	2.1	95.4	9.7	12.5	1.1	76.4	6	15.1	1	40.7	1.9	5.36	0.25	35.1	1.8	5.76	0.29	11.7	2.5	25	1.2	647.8	1.08134
FJW14_45_133	1277	54	156.3	6.4	1191	64	2060	110	4170	230	455	28	1868	90	366	20	33.7	1.7	321	18	39.8	2.5	230	12	42.6	2.6	112.5	6.7	13.22	0.74	78.8	4.2	10.8	0.42	40.5	2.9	23.2	1.1	8553	0.131234
Huanglian Formation, sandstone, late Ediacaran, N 25°46'33.3", E 116°16'58.3"
FJW14_30_1	665	27	122.1	5	1890	58	144.2	6	561	23	96.5	3.9	605	30	256	11	12.78	0.57	329	12	64.2	3.1	424	16	73.8	2.5	167.5	7.1	20.22	0.98	108.8	4.8	12.32	0.54	0.405	0.055	7.92	0.25	1406.7	0.0646032		LM	54
FJW14_30_2	673	22	508	21	122.1	4.3	164.3	7.2	373	14	44.1	1.5	203.7	8.3	40.5	1.7	6.65	0.35	35.6	1.7	3.98	0.17	22.35	0.89	4.14	0.2	11.21	0.48	1.335	0.065	7.87	0.37	1.218	0.065	2.54	0.18	5.96	0.17	785.1	4.16052		HM	35
FJW14_30_3	357	17	868	39	211	8.3	866	41	1712	85	168.4	6.6	653	36	85.1	4	14.9	0.81	63.9	3.2	7.28	0.27	42.7	1.8	7.82	0.38	18.85	0.8	2.37	0.19	12.62	0.58	1.673	0.081	17.04	0.73	3.74	0.13	3399.4	4.11374		S	2
FJW14_30_4	855	27	255.3	9.3	1400	53	4.48	0.37	33.2	1.7	10.96	0.61	132.9	7.1	98	4.3	16.34	0.85	192.2	7.5	30.3	1.2	219.6	8.9	48.8	2	153	6.1	21.44	0.9	142.5	4.1	23.36	0.91	4.42	0.27	3.34	0.13	181.54	0.182357		ALK	1
FJW14_30_5	699	11	303	11	3917	93	409	11	1314	31	228.8	5.6	1318	33	513	13	42.3	1.1	655	14	97.8	2.4	607	15	121.4	2.4	350.5	8.6	48	0.95	305.6	7.5	48.3	1.1	26.68	0.77	57.1	1.1	3269.8	0.0773551		UM	4
FJW14_30_6	863	25	166.3	5.4	371	12	13.02	0.58	43.6	1.7	7.28	0.35	42.8	2.1	18.64	0.77	3.65	0.18	32.26	0.96	6.72	0.22	55.1	1.8	13.6	0.43	42	1	5.55	0.22	31.8	1.2	4.94	0.19	0.149	0.041	1.52	0.12	106.7	0.448248		IM	33
FJW14_30_7	573	19	68.5	2.6	2133	66	96.2	2.8	326	14	54.2	1.5	318	13	172.9	6.6	6.29	0.25	287.8	7	64	2.1	431	12	75.8	1.9	175.8	4.1	20.43	0.59	105.6	3.3	11.65	0.33	1.62	0.16	4.9	0.13	794.4	0.0321144
FJW14_30_8	448	15	225.4	9.8	298	15	28	1.7	102.5	3.9	20.4	1.3	129.6	4.5	43.5	2.6	12.19	0.55	57.4	2.8	8.43	0.43	52.3	2.2	11.37	0.45	31.83	0.94	4.11	0.2	25.1	1.6	4.28	0.17	1.46	0.15	40.2	1.2	280.5	0.756376
FJW14_30_9	919	28	687	37	302	19	154.1	8	443	24	70.8	4.5	367	16	93.2	4.2	20.3	1.1	90.7	4.9	11.18	0.47	62.1	3.5	11.54	0.56	27.6	1.4	3.14	0.18	16.6	1.1	2.37	0.11	13.6	2	7.79	0.32	1034.9	2.27483
FJW14_30_10	542	36	632	37	130.1	8.7	37.2	2	142.9	9.5	23.2	1.6	123	8.9	30.2	1.9	10.42	0.63	28.4	1.8	3.92	0.2	23.3	1.6	4.47	0.24	12.09	0.79	1.44	0.13	9.05	0.54	1.175	0.068	1.41	0.33	11.28	0.5	326.3	4.8578
FJW14_30_11	674	17	591	24	263	11	221.3	8.1	628	23	95.4	4	466	19	96.8	3	9.85	0.44	82.6	3.4	9.45	0.34	50.6	1.9	9.19	0.36	22.83	0.7	2.88	0.13	16.82	0.65	2.325	0.091	3.01	0.21	18	0.48	1410.7	2.24715
FJW14_30_12	393	13	269.2	8.5	1190	44	24.2	1	178.7	7.5	47.7	2.2	391	13	222.9	8.7	6.67	0.23	302.3	9.1	50.4	1.8	282	11	42.4	1.5	89.8	2.8	9.05	0.35	43.6	1.8	5.04	0.17	0.279	0.064	36.6	1.6	641.6	0.226218
FJW14_30_13	259	10	695	29	590	29	12.77	0.79	83.5	4.6	24.9	1.9	228	12	142	6.5	31.1	1.4	174.5	7.9	22.58	0.81	124	5.5	20.65	0.7	50.2	2.4	5.67	0.32	33	1.2	4.42	0.2	50.7	4.1	63.3	3	349.17	1.17797
FJW14_30_14	317	11	397	16	715	28	147.7	4.9	453	13	72.5	2	406	14	138.5	4.8	8.1	0.22	158.4	5.2	21.16	0.68	125.4	4	23.68	0.7	63.2	1.8	7.63	0.27	44.1	1.3	5.9	0.22	4.5	1.5	9.27	0.22	1079.2	0.555245
FJW14_30_15	673	20	414	15	90.4	3.5	288	9.9	729	29	92.7	3.1	423	12	65.6	2.3	10.58	0.46	44.3	1.7	3.97	0.13	17.66	0.77	3.04	0.14	6.89	0.25	0.827	0.048	4.98	0.28	0.744	0.037	1.82	0.12	11.39	0.33	1532.7	4.57965
FJW14_30_16	1210	48	352	14	1996	76	447	19	1232	59	190.7	8.4	980	41	309	12	37.1	1.1	344	13	55.6	1.6	380	12	74.3	2.5	199.1	7	23.79	0.9	126.8	4.9	16.16	0.61	10.57	0.97	29.7	1	2849.7	0.176353
FJW14_30_17	1063	43	217.6	9.7	238	11	16.4	0.92	69.9	3	13.18	0.6	85.7	3.7	29.2	1.4	8.7	0.39	41.6	1.7	5.94	0.25	39.3	1.9	8.95	0.34	25.43	0.97	3.21	0.16	18.74	0.67	3.16	0.14	1.49	0.12	11.52	0.36	185.18	0.914286
FJW14_30_18	734	25	302	11	2195	79	578	19	1878	62	308	13	1690	65	605	24	22.01	0.8	565	19	78.6	2.8	433	15	74.3	2.2	190.5	6.9	25.71	0.72	165.4	5.7	21.2	0.69	21.1	1.1	14.71	0.51	4454	0.137585
FJW14_30_19	342	11	687	19	199.1	7.6	15.4	0.7	66.8	2.5	13.23	0.5	108.9	5.1	47.6	1.8	13.52	0.5	61.4	2.3	7.62	0.32	41.5	1.3	7.4	0.23	17.35	0.68	1.96	0.11	10.6	0.57	1.458	0.077	0.079	0.021	3.161	0.099	204.33	3.45053
FJW14_30_20	716	26	476	14	527	21	158.1	6.9	460	19	68.1	2.8	357	14	109.9	4.3	23.46	0.88	124.4	4.9	18.36	0.54	111.4	3.9	20.37	0.69	46.1	1.3	4.54	0.17	20.16	0.88	2.264	0.089	4.29	0.24	18.78	0.58	1043.2	0.903226
FJW14_30_21	94.3	3.6	1533	54	86.7	3.7	20.05	0.81	60.4	2.3	8.91	0.44	50.1	2.2	17.14	0.69	3.31	0.18	20.99	0.92	2.6	0.13	14.54	0.62	2.79	0.11	8.65	0.42	1.23	0.063	7.81	0.34	1.068	0.05	0.09	0.026	1.957	0.062	139.46	17.6817
FJW14_30_22	267.2	8.6	508	18	1577	53	52.8	2.5	320	12	80.9	3.3	635	22	276.5	9.6	68.6	2.1	311.7	8.8	44.5	1.2	284.9	9.2	56.1	1.8	159.8	5.5	21.3	0.68	136.5	4.4	20.77	0.54	65.9	3.1	308	12	1088.7	0.322131
FJW14_30_23	241	7	144	12	308	12	102.9	4.4	611	21	130.8	4.4	903	29	472	16	14.76	0.47	474	16	45.6	1.5	139.8	3.6	11.72	0.38	12.8	0.43	0.752	0.047	2.47	0.25	0.221	0.023	4	0.22	146	3	1747.7	0.467532
FJW14_30_24	961	35	201.9	8.7	1293	41	435	16	1187	43	184	5.4	943	35	346	13	11.22	0.45	403	12	66	2	352	10	38.9	1.5	45.6	1.9	2.5	0.13	7.72	0.5	0.782	0.043	12.99	0.81	125.3	3.5	2749	0.156148
FJW14_30_25	571	20	363	13	235.1	8.8	9.28	0.62	36.4	2.1	6.96	0.61	48.9	3.4	24.6	1.7	7.62	0.37	42.3	1.8	7.64	0.35	48.2	1.9	9.29	0.4	22.5	0.93	2.527	0.093	12.98	0.77	1.733	0.084	17.3	5.2	3.79	0.42	101.54	1.54402
FJW14_30_26	680	29	443	62	856	42	48	2.7	183.3	8.8	34.3	1.7	232	12	109.7	4.4	7.01	0.58	176.9	7.2	28.9	1	175.3	7.5	31.3	1.5	77.8	3.6	9.09	0.37	52.1	2.3	6.27	0.33	1.78	0.37	8.21	0.78	497.6	0.517523
FJW14_30_27	493	14	559	26	90.5	3.3	177.9	7	326	12	30.8	1.2	123.8	4.7	22.68	0.91	4.4	0.2	20.81	0.95	2.75	0.1	16.65	0.54	3.39	0.17	8.65	0.32	1.05	0.051	5.7	0.39	0.861	0.051	14.29	0.69	9.75	0.23	658.5	6.1768
FJW14_30_28	805	28	424	15	253.7	7.7	309	11	652	24	74	2.9	308	11	54.6	2	8.89	0.35	50.1	2.1	6.77	0.28	41.2	1.4	8.42	0.3	23.21	0.75	3.26	0.16	20.23	0.75	3.02	0.13	5.38	0.3	14.06	0.51	1343	1.67127
FJW14_30_29	597	17	313.2	9.6	169.4	6.5	211.3	6.6	478	17	56.6	2	253.2	9.2	46	1.7	8.77	0.3	43.9	1.3	5.36	0.17	31.2	1.1	6.29	0.25	16.99	0.46	2.23	0.14	12.39	0.58	1.818	0.071	4.84	0.39	5.31	0.17	999.1	1.84888
FJW14_30_30	314	11	422	17	921	37	25	2.5	112.1	7.1	26	1.3	223.8	8.2	115.5	4.6	30.05	0.93	165.4	5	26.31	0.66	165.7	5.9	31.45	0.93	86.6	2.5	10.88	0.41	68.3	2.6	9.76	0.28	49	3.7	20.93	0.49	386.9	0.458198
FJW14_30_31	288.5	4.8	291.1	5.8	1342	90	12.69	0.97	44.1	2.9	8.35	0.59	57.4	3.9	39.9	2.8	15.54	0.94	99.9	6.5	21.5	1.3	183	12	45.2	2.7	138.3	9.6	19.5	1.5	113.1	8.3	17.5	1.2	5.79	0.87	31.6	3.2	122.54	0.216915
FJW14_30_32	653	27	264.1	9.9	281	16	62.6	3.3	233	16	41.4	2.8	230	13	57	3.1	12.97	0.89	54.9	3.7	6.33	0.44	38.2	2.7	7.64	0.55	23.3	1.4	3.39	0.19	26.3	1.7	5.06	0.36	14.14	0.96	8.29	0.63	567	0.939858
FJW14_30_33	1729	54	495	18	1359	55	170.2	7.8	471	25	67.4	2.8	347	16	109.1	4	4.61	0.19	136.1	6.8	24.37	0.96	192.6	6.6	44.3	2.1	137.9	6.1	20.8	0.91	125.2	4.5	16.25	0.57	3.84	0.36	20.4	1	1055.6	0.364238
FJW14_30_34	354	11	181.4	5.7	637	19	2.5	0.16	11.71	0.47	2.52	0.15	21.5	1.1	18.08	0.72	6.19	0.25	54.4	1.8	13.24	0.48	113.4	3.8	24.45	0.86	68	2.4	8.79	0.28	51.8	1.9	6.72	0.19	0.771	0.073	2.183	0.066	38.23	0.284772
FJW14_30_35	876	31	463	21	726	30	468	20	1368	52	205	9.5	963	37	230.4	7.4	8.22	0.43	208.2	8.6	26.7	1.2	150.3	5.9	27.62	0.99	70.9	2.6	8.44	0.36	47.4	1.9	6.35	0.24	8.78	0.5	87.5	3.1	3004	0.637741
FJW14_30_36	538	23	145.6	6.8	1043	74	198	10	588	35	91.2	5.8	505	35	162	9.5	8.89	0.66	201	10	29.6	1.8	180.7	9.8	35	2	93	4.8	11.29	0.66	63.6	3.8	8.32	0.48	19.4	2	70.6	5	1382.2	0.139597
FJW14_30_37	1666	59	103.5	3.8	2220	88	178.9	6.7	703	28	120.1	4	674	30	318	10	10.3	0.37	437	13	79.7	2.4	514	17	85.5	3	200.5	6.8	23.05	0.72	107	3.8	10.28	0.33	2.58	0.17	28.27	0.72	1676	0.0466216
FJW14_30_38	1280	100	410	70	675	39	48.5	3.3	183	16	31.2	2.8	198	17	91.6	7.6	19.6	1.6	146	11	27.5	2.1	175	13	30.4	2.6	66.3	4.7	8.99	0.63	52.4	3.5	6.33	0.45	2.3	0.31	12.04	0.94	460.7	0.607407
FJW14_30_39	833	22	191.1	6.1	1531	64	11.25	0.58	39.6	1.6	8.88	0.5	72.5	3.4	49.9	1.8	10.8	0.38	112	3.7	25.92	0.95	226.1	8	53.3	1.7	164.1	4.8	22.62	0.85	132.6	5.2	18.09	0.57	0.61	0.22	1.79	0.12	132.23	0.12482
FJW14_30_40	676	61	367	30	1138	78	57.5	5.7	253	30	51.7	3.8	297	22	162.5	6.3	31	2.3	256	19	44.8	3.5	288	28	51.3	3	112	7.5	13.96	0.62	78	5	10.29	0.78	1.3	0.46	21.7	1.1	659.2	0.322496
FJW14_30_41	583	23	286.8	8.1	603	22	40.9	1.8	182.1	8.8	34.4	1.7	217	11	69	2.6	21.7	0.7	83.1	2.9	12.94	0.44	90.6	2.4	20.29	0.79	63.3	2.3	9.5	0.31	65.3	1.9	10.2	0.32	4.83	0.24	24.4	0.65	474.4	0.475622
FJW14_30_42	189.1	5.6	883	32	456	13	172.4	4.6	678	25	113.8	5.2	616	27	134.8	5	27.69	0.83	103.5	4.2	12.59	0.43	75.3	2.9	15.25	0.56	47	1.8	6.68	0.3	44.6	2.1	6.46	0.24	55.5	3.2	72.2	2.3	1580.2	1.9364
FJW14_30_43	564	17	110.4	4.5	1378	55	40	1.9	218	10	47.2	2	315	15	162.9	7	2.9	0.12	253.1	7.6	42.9	1.7	269.8	8	53.3	1.5	151.2	4.1	22.45	0.68	155.3	5.1	23.24	0.65	7.32	0.31	29.68	0.8	620.2	0.0801161
FJW14_30_44	447	14	270.7	9.3	1196	43	79.6	2.9	299	10	56.8	2.4	348	12	177.2	5.8	32.67	0.94	292.8	9	55.7	2	342	11	42.6	1.2	63.8	2	4.2	0.18	12.57	0.67	0.861	0.054	0.572	0.072	39.85	0.91	783.4	0.226338
FJW14_30_45	644	20	168	5.5	226.3	7.3	163.6	4.9	341	12	42.7	1.6	214.9	9	49.5	1.8	7.63	0.37	54.1	1.8	6.92	0.21	42.1	1.4	7.86	0.24	19.01	0.6	2.22	0.1	12.17	0.52	1.674	0.072	2.52	0.15	15.28	0.33	762.2	0.742377
FJW14_30_46	367	18	1908	96	118.9	5	402	18	613	26	53.8	2.6	207.3	9.7	33.7	2.7	5.44	0.36	29.2	1.5	4.12	0.27	23.9	1.2	4.62	0.24	10.61	0.67	1.296	0.085	6.92	0.51	0.955	0.051	104.3	6.3	68.8	2.2	1276.1	16.0471
FJW14_30_47	473	18	656	44	596	24	906	39	1901	90	236	10	1026	46	195.1	8.5	34.7	1.2	169.7	6.1	21.61	0.68	118.9	4.3	22.45	0.78	53.9	2.3	7.17	0.26	40.1	1.6	5.71	0.21	89.4	3.5	16.67	0.51	4069	1.10067
FJW14_30_48	703	24	561	22	645	33	444	22	1124	44	157.1	6.9	746	32	182.8	8.1	10.25	0.52	179.2	7.5	22.12	0.97	130.3	5	23.3	1.1	60.5	3.1	7.38	0.35	38.7	1.6	5.28	0.25	30.6	1.8	59.6	3	2471.1	0.869767
FJW14_30_49	525	21	886	48	211.9	8.8	400	23	1030	61	137.4	6.4	585	32	110.1	4.8	11.97	0.53	82	3.9	8.72	0.4	45	2.2	8.25	0.33	20.03	0.81	2.35	0.13	13.76	0.58	1.781	0.078	6.59	0.47	23.08	0.75	2152.4	4.18122
FJW14_30_50	755	22	70.6	2.6	2440	78	455	20	1240	40	187.3	6	949	34	284.4	9	12.62	0.51	354	10	56.7	1.5	378.1	9.8	79.1	1.9	218.4	7.3	28.3	1.1	160.5	5	22.1	0.56	15.7	0.67	22.85	0.61	2831.3	0.0289344
FJW14_30_51	565	15	172	5.3	623	23	20.87	0.84	72.5	3.2	14.58	0.64	98	4.1	44.1	1.3	9.83	0.31	75.7	2.5	12.42	0.35	87.3	2.6	19.49	0.6	59.7	2.2	7.86	0.24	53.6	1.6	9.13	0.29	0.175	0.037	2.729	0.076	205.95	0.276083
FJW14_30_52	648	27	435	23	311	14	39.2	1.5	138	5.7	23.5	1.6	138.2	6	51.3	3	11.89	0.48	63.1	3	8.68	0.51	53.6	2.9	10.42	0.52	26.5	1.1	3.53	0.19	20.03	0.8	3.05	0.14	0.79	0.14	22.17	0.82	338.9	1.39871
FJW14_30_53	354	11	198.2	6.4	181.3	6	14.42	0.52	60.9	2.2	13.23	0.62	93.7	4	33.9	1.4	4.56	0.22	43.7	1.8	5.75	0.2	34	0.8	6.43	0.25	16.2	0.63	1.836	0.077	10.93	0.4	1.405	0.057	0.262	0.051	16.83	0.4	182.25	1.09322
FJW14_30_54	564	21	369	12	2620	95	84.7	2.8	312	10	63.4	3	441	19	238.4	8.4	29.57	0.86	394	13	68.1	2.4	456	13	89.1	2.1	226.8	4.8	27.89	0.73	153.5	4.9	19.05	0.47	35.9	1.3	27.68	0.98	901.1	0.14084
FJW14_30_55	543	16	309	17	1280	43	59.2	2.7	204.2	7.5	38.6	2	249.5	8	118.7	3.7	14.57	0.51	184.8	5.7	32.59	0.98	222.3	6.9	44.5	1.3	113	4	14.49	0.56	79.3	2.9	9.91	0.38	22	2.6	5.81	0.19	551.5	0.241406
FJW14_30_56	191	14	166	16	856	69	25.6	1.9	139.4	6.1	29.2	2.3	206	14	93.8	6.1	5.01	0.41	117.8	9.3	13.8	1.2	98.5	7.9	24.2	1.7	97.2	7.1	16.95	0.82	121.6	6.9	17.5	1.2	0.63	0.12	8.23	0.56	400.2	0.193925
FJW14_30_57	344	15	888	39	672	27	1453	67	3360	150	400	18	1766	60	328	12	51.8	1.9	253	10	29.3	1.1	151.9	4.4	26.44	0.95	61	2.2	6.81	0.24	36.9	1.4	4.83	0.18	33.3	1.5	5.8	0.16	6979	1.32143
FJW14_30_58	357	17	702	34	571	19	314	11	887	43	126	4.5	708	27	163.1	6.5	36.2	1.3	161.1	6.2	20.48	0.57	114.3	4.3	21.71	0.87	53.1	1.9	6.57	0.32	37.6	1.7	4.87	0.22	3.1	0.26	1.183	0.035	2035	1.22942
FJW14_30_59	210.3	9.9	654	34	501	34	11.58	0.66	70.9	4	17.34	0.97	130.9	7.8	74.5	6.4	15.8	1	104.7	6.6	19.5	1.3	121.6	7.1	20.1	1.6	42.3	2.7	4.29	0.28	18.3	1.2	1.88	0.13	0.159	0.059	5.05	0.29	230.72	1.30539
FJW14_30_60	431	14	664	27	4580	480	420	38	1290	130	206	19	1240	100	485	44	76.3	6.9	698	69	117	12	772	83	162	18	455	49	58	6.8	351	41	50.2	5.9	267	15	52.7	6.1	3156	0.144978
FJW14_30_61	268.2	8.5	373	13	577	19	330	13	990	45	147.9	6.3	762	29	182.8	6.8	17.25	0.78	166.1	5.3	20.96	0.8	115.7	3.8	20.23	0.66	46.3	1.3	5.41	0.18	28.2	1	3.43	0.15	86.6	3.2	42.2	1	2229.9	0.646447
FJW14_30_62	368	17	518	27	281	17	266	14	682	42	84.6	3.6	459	22	91.7	4.8	38.5	1.6	88.5	4.1	10.82	0.46	57.7	2.9	10.9	0.61	24.4	1.3	2.8	0.2	15	0.8	2.14	0.16	40	4.5	5.64	0.43	1491.6	1.84342
FJW14_30_63	274.6	9	463	19	1164	57	930	36	2640	120	365	18	1814	90	358	18	28.15	0.98	302	14	36.3	1.6	203	9.3	38.6	1.9	104.3	4.3	13.72	0.51	82.7	3.6	12.32	0.51	97.3	6.2	50.8	2.5	5749	0.397766
FJW14_30_64	707	28	120.9	5	1210	54	46.9	1.9	221	12	50.1	2.3	407	17	223	10	22.35	0.91	290	12	41.3	1.9	242	9.7	42.9	2	106.1	4.3	12.09	0.47	60	2.5	7.86	0.3	0.185	0.039	11.56	0.73	725	0.0999174
FJW14_30_65	838	33	481	18	303	13	12.25	0.72	42.8	2	6.99	0.45	44.3	2.2	19.7	1.2	7.29	0.37	30.3	1.4	5.58	0.28	40.5	1.9	9.04	0.41	29.7	1.3	3.67	0.17	24.79	0.92	3.88	0.15	4.2	0.42	9.01	0.3	106.34	1.58746
FJW14_30_66	608	16	399	14	377	10	121.1	4.3	386	12	63.2	2.2	326	11	90.1	3.7	12.23	0.43	87.3	3	11.79	0.43	72	2.9	13.17	0.44	36.4	1.1	4.4	0.14	26.32	0.89	3.44	0.13	0.805	0.085	10.03	0.28	896.3	1.05836
FJW14_30_67	293	13	185.1	7.4	1003	42	49.3	2.1	216.7	9.5	44.7	1.9	312	13	166.9	6.6	9.94	0.39	244.5	8	40.2	1.4	240	10	39.2	1.4	87.3	3.4	8.93	0.39	44.9	1.6	4.89	0.18	0.274	0.053	5.12	0.19	622.7	0.184546
FJW14_30_68	335	10	629	19	66.6	3.3	97.2	3.9	172.1	5.3	18.1	0.74	75	2.9	14.51	0.66	3.98	0.16	14.35	0.78	1.95	0.091	12.27	0.66	2.3	0.14	6.02	0.27	0.769	0.058	4.35	0.31	0.552	0.034	6.78	0.45	9.67	0.27	362.4	9.44444
FJW14_30_69	1006	35	414	18	332	12	79	3	239.4	7.6	32.2	1.2	163.9	6.9	45.6	2.4	12.86	0.61	48.1	1.6	7.4	0.3	48.3	1.5	10.38	0.33	30.3	1.1	4.29	0.22	27.5	1.3	4.25	0.2	20	7.6	5.25	0.3	514.5	1.24699
FJW14_30_70	986	40	403	15	713	26	126.9	5.4	371	12	52.1	2.6	256	10	73.2	3.8	35.2	1.2	82.6	2.2	13.62	0.47	103.4	4.4	22.65	0.83	72.6	1.9	10.82	0.39	70.7	1.8	10.59	0.36	7.73	0.81	6.85	0.25	806	0.565217
FJW14_30_71	301.7	7.5	476	30	996	34	27.3	1.2	111.1	4.1	22.14	0.72	157.9	7.4	70.1	2.6	18.9	0.66	116.7	3.5	19.36	0.64	145	4.4	33.1	1	98.2	2.6	12.42	0.48	72.5	2.4	10.65	0.36	0.429	0.048	3.1	0.12	318.44	0.477912
FJW14_30_72	841	25	398	15	189.9	8.8	165.4	8.2	491	21	75	2.4	368	12	76	3.3	8.46	0.3	59.1	2.7	6.53	0.29	33.4	1.7	6.17	0.26	15.9	0.73	1.78	0.12	11.59	0.72	1.951	0.09	3.72	0.28	9.89	0.4	1099.4	2.09584
FJW14_30_73	767	23	557	27	150.2	5.3	94	3.7	251	8.9	33.3	1.1	168.7	7	40.7	2	10.27	0.39	38.5	1.4	4.44	0.17	25.72	0.85	5.07	0.21	14.25	0.48	1.792	0.098	9.76	0.4	1.672	0.063	7.6	1	5.91	0.18	547	3.70839
FJW14_30_74	159	5.8	166.4	6.7	1041	41	3.84	0.29	26.6	1.6	9.29	0.54	106	5.3	102	4.9	32.2	1.3	212.4	8	35.8	1.3	228	7.9	41.2	1.8	91.4	4	8.7	0.4	38.5	1.3	4.34	0.2	2.04	0.19	10.62	0.54	145.73	0.159846
FJW14_30_75	511.8	9.8	714	12	221.1	6.9	257.5	5.8	721	13	92.9	2.1	430	12	75.6	2.1	25.19	0.86	63.2	2.1	7.07	0.18	39.9	1.1	7.6	0.17	20.06	0.63	2.46	0.14	15.51	0.72	2.48	0.11	58.9	2.9	38.81	0.86	1501.4	3.22931
FJW14_30_76	523	23	616	27	100	5	146.8	7.4	419	25	48.7	3.1	218	13	36.5	2	13.28	0.59	29.1	1.8	3.08	0.15	18.11	0.78	3.44	0.15	9.27	0.51	1.214	0.089	7.3	0.44	1.216	0.063	21.4	1.5	21.11	0.74	832.5	6.16
FJW14_30_77	1978	76	140.6	5.6	1238	55	34.4	1.8	224	11	49.3	2.4	305	11	169.9	7.3	8.55	0.42	236.9	9	44.9	2	290.4	9.2	51	1.9	116.3	2.9	13.99	0.51	78.4	3	8.44	0.25	0	1	7.33	0.21	612.7	0.11357
FJW14_30_78	1020	39	489	23	294.4	8.5	260.3	8.7	649	21	92.4	3.3	446	14	97.2	4.1	5.91	0.24	86.9	2.9	10.97	0.32	61.2	1.8	11.53	0.39	28.9	1.1	3.37	0.16	19.32	0.8	2.58	0.11	1.42	0.13	28	0.93	1447.7	1.66101
FJW14_30_79	497	16	715	26	1565	70	4120	140	9910	450	1174	40	4630	200	774	31	76.7	3.2	528	17	61.1	2.2	326	11	57	1.6	141.3	5.5	18.36	0.69	112.5	4.9	14.37	0.55	337	17	111.7	2.8	19834	0.456869
FJW14_30_80	249	11	235	12	1137	52	3.2	0.25	33.6	1.5	12.07	0.81	142.9	8.6	124	5.5	3.58	0.22	213.9	8.5	34.2	1.1	231.5	9.8	43.9	2	119.3	4.6	14.74	0.6	81.7	4.3	10.28	0.36	2.44	0.27	11.1	1.1	191.77	0.206684
FJW14_30_81	904	24	153.8	5.1	1060	40	67.2	4.2	324	17	62.1	3	410	18	201.4	9.1	10.51	0.55	270	12	44.8	2	273	11	44.2	1.2	102.7	4.5	12.35	0.58	67.3	3.6	7.96	0.35	16.6	2.5	24.1	0.81	863.3	0.145094
FJW14_30_82	476	15	343	13	199.9	8	4.13	0.67	12.1	1.5	2.34	0.22	15.6	1.4	11.45	0.8	1.62	0.13	27.4	1.2	4.9	0.2	34.6	1.3	7.1	0.34	18.72	0.71	2.059	0.09	10.73	0.54	1.386	0.065	1.42	0.63	5.36	0.45	34.17	1.71586
FJW14_30_83	471	17	822	38	464	21	9.18	0.57	30	1.7	5.68	0.34	37.3	1.9	18.8	1	6.46	0.26	41	1.8	7.96	0.3	68.5	2.3	15.65	0.6	48.4	1.7	6.53	0.25	41.3	1.6	5.99	0.22	7.82	0.91	4.88	0.18	82.16	1.77155
FJW14_30_84	167.1	5.5	607	20	221.2	8.6	90.5	3.8	187.9	7.8	22.01	0.87	116.9	5	29.4	1.3	7.93	0.29	36.3	1.4	5.28	0.24	35.8	1.3	7.89	0.29	22.51	0.73	3.07	0.11	19.33	0.85	3.11	0.12	35	2.2	8.39	0.33	417.31	2.74412
FJW14_30_85	639	25	286.8	9.5	4710	180	231.7	8.7	708	29	112.3	3.9	611	21	223.1	7.5	12.55	0.54	326.7	9.9	66.6	2.3	556	20	139.9	5.1	509	15	87	2.6	625	17	96.5	2.8	12.9	1.4	18.52	0.53	1663	0.0608917
FJW14_30_86	1038	35	99.3	3.8	1637	55	168.9	5.5	575	19	97.1	3.7	531	18	216.9	6.2	27.3	0.93	271.4	7.9	50.6	1.6	332.7	7.4	61.6	2	160.9	5.7	19.62	0.63	109	4.1	12.55	0.36	1.02	0.11	3.7	0.17	1372	0.0606597
FJW14_30_87	136.2	4.7	165.8	6.8	920	36	18.66	0.73	141.9	5.2	37	1.4	298	13	184.4	7.2	6	0.22	271.4	8.7	43.8	1.4	242.8	8.9	35.7	1.3	68.6	2.2	6.66	0.26	28.7	1.1	2.784	0.099	0.193	0.034	18.96	0.98	495.56	0.180217
FJW14_30_88	534	16	144.5	5.6	1330	48	51.8	2.1	182.1	7	35.2	1.5	222.2	9	123	4.7	13.68	0.5	228.6	7	44	1.4	297	8	51.3	1.5	116.9	4.6	11.65	0.46	53.2	1.9	5.57	0.19	1.32	0.28	21.4	3.1	491.3	0.108647
FJW14_30_89	696	23	99.3	3.2	2064	73	243	11	734	30	120.9	5.5	689	26	292.6	8	16.42	0.66	376	14	57.2	1.8	368.4	9.3	70.9	2.2	177.3	5.4	23.49	0.7	138.9	4.2	18.36	0.48	7.73	0.37	4.06	0.12	1786.9	0.0481105
FJW14_30_90	958	30	210	11	2131	88	213.9	7.5	686	26	106.5	3.5	578	23	232.4	6.5	8.01	0.31	342	11	64.3	2.1	421	12	78.5	2.2	203.3	5.8	23.71	0.92	118.4	3.4	13.81	0.38	13.3	3	48.8	1.3	1584.4	0.0985453
FJW14_30_91	377	11	186.4	5.1	1079	41	21.2	1.1	171.7	5.6	49.8	2.3	411	19	186	6.6	52.4	1.7	228.8	9.7	31.3	1.1	200.6	8.2	39.8	1.5	110.4	3.9	14.64	0.62	89.5	2.6	14.16	0.48	28.9	1.6	70.3	2.1	653.7	0.172753
FJW14_30_92	701	28	322	11	1229	46	124.2	4.3	347	12	62.5	2.2	410	13	168.2	4.7	5.03	0.22	220	8.5	33.3	1.1	212.2	6.4	42.9	0.98	113.8	3.3	13.89	0.43	76.5	2.5	9.91	0.22	10.71	0.54	6.34	0.2	943.7	0.262002
FJW14_30_93	865	29	219.7	7.6	2570	99	207.3	8.5	677	32	112.7	4.7	760	33	322	14	7.21	0.36	426	18	68.2	2	446	15	86.1	2.7	242.2	9.2	30.1	1.1	171.2	5.8	21.91	0.62	31.1	1.9	52.7	2.1	1757	0.0854864
FJW14_30_94	357	16	363	16	372	18	85.1	4.3	238	16	30.1	1.6	151	7.8	44	3.7	5.84	0.44	55.8	2.7	8.94	0.5	61.5	2.8	14.51	0.74	41.7	2.8	5.2	0.41	28.1	1.8	4.58	0.23	23.4	2.2	16.52	0.91	504.2	0.975806
FJW14_30_95	896	40	297	18	458	19	20.37	0.99	68.2	4.2	11.64	0.74	70.8	4.1	38.7	2.5	7.2	0.34	80.5	3.1	15.66	0.65	106	4.8	18	1	44.9	2.3	5.74	0.3	33.4	1.3	4.02	0.17	1.14	0.5	14.2	1.2	171.01	0.648472
FJW14_30_96	3720	100	330	12	1085	33	61.3	2.4	272.1	9.7	50.8	1.3	333	12	146.3	4.7	37.4	1.4	181.4	5.1	31.99	0.92	210.2	6.4	40.1	1	111.3	3.2	14.56	0.56	83.7	2.5	10.43	0.33	0.109	0.031	17.95	0.51	717.2	0.304147
FJW14_30_97	1062	31	145.6	4.8	2058	68	97.5	3.2	609	18	122.3	4.1	727	24	335.7	8.3	13.38	0.43	384	10	68.9	1.9	453	11	81.2	2.7	200.3	5.9	23.91	0.73	119.1	2.9	12.93	0.36	0.208	0.048	74.6	1.3	1555.8	0.0707483
FJW14_30_98	387	14	345	46	1645	63	31	2.2	122.3	7.1	24.6	1.3	164	12	80.8	4.5	3.12	0.22	144.9	6.4	30.1	1.6	240	12	53.3	2.8	151.4	7	20.11	0.85	126.7	5.8	15.89	0.78	12.2	1.3	18.32	0.94	341.9	0.209726
FJW14_30_99	800	27	587	19	262.2	8.6	57.6	2.2	223.8	8.7	41.4	1.7	236	10	73.9	2.3	9.73	0.34	72.1	1.9	8.94	0.33	50.7	1.6	8.95	0.3	23.6	0.71	2.76	0.13	15.66	0.55	2.212	0.094	0.303	0.059	2.554	0.088	558.8	2.23875
FJW14_30_100	242.7	7.7	4280	110	334	11	624	24	1523	64	204.8	8.8	1005	39	204.5	7.5	44	1.4	156.3	4.9	16.56	0.46	81.6	2.7	12.64	0.45	28	1.1	3.23	0.11	16.46	0.65	2.046	0.086	19.42	0.76	2.876	0.072	3356.8	12.8144
FJW14_30_101	221.1	8.6	336	13	947	39	743	35	2650	100	433	18	2420	120	571	22	62	2.7	469	16	51.8	2	238	10	37	1.6	78.3	3.5	7.93	0.32	37.5	1.9	4.6	0.24	10.27	0.5	40.9	1.5	6246	0.354805
FJW14_30_102	722	43	767	24	421	28	549	29	1439	76	184	14	841	45	158	12	16.1	1.4	132.5	8.2	15.07	0.8	85.1	5	15.2	1	38.5	1.9	4.33	0.28	24.8	2	3.47	0.23	33.2	7.2	32.3	2.3	3013	1.82185
FJW14_30_103	621	25	260.8	7.3	971	35	239.7	9.2	895	41	157.3	6	926	29	352	10	17.66	0.73	383	13	58.2	2	283.9	7.2	35.9	1	56.2	2.5	4.16	0.18	17.52	0.79	1.796	0.08	9.18	0.93	46.8	1.4	2218	0.268589
FJW14_30_104	295	11	396	28	245	8.6	7.69	0.53	27.7	1.5	5.23	0.28	37	2.2	15.48	0.88	4.52	0.18	25.8	1.1	4.65	0.16	36	1.4	8.72	0.36	27.25	0.92	3.59	0.17	21.15	0.8	3.06	0.13	0.45	0.1	2.19	0.074	77.62	1.61633
FJW14_30_105	622	21	158	22	2063	75	131.6	5.5	382	16	59.4	2	351	12	156.3	5.1	5.4	0.25	228.2	7.3	42.5	1.4	314.6	9.1	69.8	2.4	204.2	6.9	27.28	0.96	160	6.2	22.31	0.77	3.98	0.33	12.14	0.41	924	0.0765875
FJW14_30_106	1222	42	259.4	9.4	227.9	8.4	203.1	8.1	450	20	52.8	2.7	223.4	8.5	47	2.1	10.98	0.42	40.3	1.9	5.72	0.25	36.6	1.5	7.42	0.29	20.75	0.78	2.72	0.11	16.03	0.93	2.28	0.1	2.63	0.18	26.32	0.71	929.3	1.13822
FJW14_30_107	743	24	605	18	137.5	5.3	177	7.9	504	22	65.7	2.7	316	13	58.3	2.2	11.08	0.51	42.4	1.6	4.79	0.22	26.47	0.9	4.98	0.22	12.29	0.52	1.488	0.078	8.17	0.46	1.188	0.05	8.02	0.63	17.4	0.57	1062.7	4.4
FJW14_30_108	870	25	161.8	6.6	1369	57	95.3	4.1	285.3	9.5	47.3	2.2	314	14	132	4.8	15.35	0.52	192.8	6.8	29.5	1	206.2	6.5	43.6	1.6	128.8	4.1	16.87	0.68	100.9	4	16.37	0.44	0.422	0.05	2.348	0.065	741.9	0.118188
FJW14_30_109	896	28	637	24	99.2	3.8	301.5	9.6	505	20	48.2	2.1	185.5	7	32	1.8	4.88	0.22	26.4	1.1	3.27	0.11	19.8	0.83	3.58	0.17	8.41	0.39	0.924	0.053	4.93	0.3	0.701	0.035	11.06	0.84	28.8	1.6	1040.2	6.42137
FJW14_30_110	654	24	505	23	1352	63	88.2	3.1	340	12	67.3	2.8	427	18	199.2	8.7	28.5	1.2	280	10	51.5	2	329	14	56	2.3	130.8	4.8	15.18	0.56	76.8	3.1	9.2	0.36	1.71	0.52	47.6	1.2	922.5	0.373521
FJW14_30_111	719	22	467	14	1562	63	92.3	5	271	15	46.5	2.2	280	16	112.9	6.3	28.2	1.1	173.8	9.5	31.3	1.3	235	11	52.4	2	157.7	6.4	20.3	0.78	115.1	5.2	15.95	0.64	7.64	0.65	10.22	0.38	689.8	0.298976
FJW14_30_112	464	15	384	18	135.6	7.3	39.8	1.8	123.8	6	19.29	0.82	103.8	5	29.1	1.6	9.26	0.37	31.7	1.5	4.23	0.23	24.2	1.2	4.65	0.19	11.76	0.45	1.337	0.077	8.34	0.57	1.344	0.097	2.69	0.6	5.16	0.36	286.69	2.83186
FJW14_30_113	259.9	9.7	413	16	641	24	1204	42	2740	120	325	14	1433	59	241.4	8.9	22.44	0.81	186.4	6.9	21.62	0.83	113.7	4.1	20.19	0.83	51.7	2	6.87	0.2	41.7	1.7	7.04	0.24	92.2	4	37.61	0.96	5702	0.644306
FJW14_30_114	1254	29	682	18	497	11	78.1	1.9	239.7	5.9	40.4	1.4	238	7.2	79.2	2.9	21.51	0.74	91.7	3.3	13.23	0.47	84.3	2.8	16.35	0.51	46.1	1.8	6.07	0.22	37	0.97	5	0.24	3.2	0.65	4.97	0.21	596.2	1.37223
FJW14_30_115	261.8	8.6	813	31	412	17	411	16	1352	52	204.6	7.8	1093	36	220.6	8.3	16.96	0.59	162.2	4.4	17.8	0.61	91.9	3.2	15.06	0.46	36.2	1.6	4.03	0.17	21.18	0.7	2.65	0.097	2.21	0.16	3.333	0.095	3060.6	1.9733
FJW14_30_116	362	15	1083	34	112	8.4	560	24	918	57	88.5	5.5	356	23	64	6.3	13.5	1.4	54.6	5.8	6.07	0.55	27.8	2.7	4.47	0.39	10.01	0.75	1.14	0.094	6.73	0.53	0.958	0.062	19.9	2.3	11.81	0.82	1922.5	9.66964
FJW14_30_117	381	17	191	11	621	27	25	1.5	80.2	4.2	12.83	0.67	71.2	3.1	30.8	1.8	6.3	0.41	47.3	1.8	9.17	0.36	72.7	2.5	18.29	0.83	62.1	2.5	9.16	0.45	65.1	2.5	10.54	0.41	0.93	0.11	21.64	0.61	189.23	0.307568
FJW14_30_118	239	12	977	56	39.5	3.1	41.7	2.9	144	11	19.8	1.5	106.5	8.1	17.8	1.6	3.65	0.34	14.1	1	1.51	0.15	7.71	0.52	1.4	0.12	3.46	0.29	0.389	0.045	2.16	0.29	0.31	0.048	1.04	0.19	4.09	0.16	312	24.7342
FJW14_30_119	504	17	491	14	84.2	4	85	2.9	259.4	8.3	37.2	1.2	200	7.9	39.7	1.7	7.25	0.27	30.95	0.85	3.25	0.12	15.85	0.59	2.89	0.15	7.09	0.33	0.82	0.042	4.6	0.24	0.677	0.034	0.231	0.047	3.22	0.12	581.6	5.83135
FJW14_30_120	89.8	4.7	163.1	8.3	854	32	789	34	1996	83	238.1	8.7	1068	55	222.3	8.3	32.6	1.1	193	6.7	24.19	0.82	145.8	6.2	27.1	1	70.8	3	9.21	0.38	54.2	1.8	7.45	0.25	542	27	199.7	6.3	4091.1	0.190984
FJW14_30_121	245.4	8.9	314	13	233.2	8.6	54.7	2.5	159.6	7.1	22	1.1	109.4	4.2	28.7	1.3	7.52	0.32	37.4	1.7	5.45	0.23	35.6	1.5	7.89	0.29	22.6	1	3.13	0.17	19.4	0.71	3.39	0.13	2.13	0.25	3.52	0.11	345.7	1.34648
FJW14_30_122	806	20	201.4	7.1	1167	54	23.01	0.95	86	3.4	15.64	0.67	121.3	4.9	72.6	2.4	9.7	0.31	164.6	4.6	32.26	0.92	244.9	7	48.4	1.3	124.5	3.8	15.2	0.47	87.3	2.4	10.72	0.31	0.747	0.089	16.2	1.2	245.95	0.172579
FJW14_30_123	184.9	7.2	426	12	1168	40	1464	70	3910	200	454	18	1781	73	346	12	32.7	1	257.4	8	33.5	1.2	195.6	6.9	36.5	1.3	106.4	3.5	15.16	0.53	94.7	2.9	14.69	0.4	138.6	5.1	141.4	4.3	7609	0.364726
FJW14_30_124	274.3	8.9	2355	67	163.1	8.7	1865	94	2010	100	153.1	6.2	534	27	72.6	3.9	16.32	0.74	52.4	2.1	5.5	0.26	29.9	1.6	5.19	0.24	13.63	0.77	1.67	0.11	9.82	0.57	1.62	0.083	92.2	4.4	20.62	0.69	4562.1	14.439
FJW14_30_125	318	10	147	15	184.4	7.7	31.6	2.4	97.5	7.8	14.2	1.1	80.3	6.1	23.1	2.2	5.2	0.35	27.9	1.7	4.06	0.25	24.4	1.3	5.26	0.27	16.29	0.66	2.33	0.15	16.41	0.73	3.53	0.15	4.4	1.1	1.792	0.053	223.6	0.79718
FJW14_30_126	679	26	937	33	148.6	5.8	401	19	771	35	70.9	3	297	13	44	1.7	9.57	0.47	41.4	1.7	4.69	0.2	26.4	1	5.35	0.25	13.12	0.59	1.561	0.094	8.99	0.55	1.386	0.064	11.35	0.63	9.56	0.39	1539.9	6.30552
FJW14_30_127	204.9	7.5	200.3	8.2	415	18	909	41	2530	110	367	14	1826	79	414	18	62.1	1.9	288	10	29.3	1.1	121.1	4.7	16.55	0.63	31.1	1.1	2.85	0.12	12.86	0.58	1.517	0.083	38.2	1.9	80.6	2.4	5632	0.482651
FJW14_30_128	277	10	482	18	616	18	25.65	0.88	118.5	6.3	24.4	1.1	148.6	6.4	80.5	3.1	34.6	1.1	129.8	4.2	25.03	0.64	162.2	4.8	28.97	0.88	67.5	2.4	7.51	0.21	39.5	1.7	4.61	0.15	1.57	0.14	73.6	1.8	317.15	0.782468
FJW14_30_129	469	16	294	10	6020	210	773	29	3340	150	584	26	3530	130	1067	37	194.4	6	1087	30	158.1	4.7	994	34	201.6	7.2	568	16	78.3	2.9	508	16	79.8	2.2	880	49	443	18	8227	0.0488372
Lintian Formation, sandstone, Cambrian, N 25°51'24.4", E 116°18'11.1"
FJW14_28_1	3760	120	161.8	6.5	2604	87	307	19	956	44	148.7	7.2	711	27	233.7	6.6	20.73	0.8	289.3	9.5	56.5	1.8	434	13	93.1	3.5	299	12	41.8	1.4	254	9.2	33.5	1.2	1.61	0.2	13.15	0.31	2122.7	0.0621352		LM	4
FJW14_28_2	190.9	6.9	229.6	7.3	2171	87	100.7	4.6	331	14	60.5	2.8	380	14	165.2	6.8	9.81	0.39	266.4	8.2	45.8	1.3	345	11	75.2	2.4	216.3	7.1	29.1	1.1	156.7	5.1	19.68	0.44	14.87	0.91	13.16	0.43	872.2	0.105758		HM	19
FJW14_28_3	147.2	3.8	209.1	6.3	2075	59	49.4	2.2	207.9	7	41.4	1.6	283	11	145.3	3.7	10.17	0.32	250.6	7.7	44.4	1.1	324.5	8.7	74.1	1.7	216.5	5.4	27.99	0.63	155.1	4.5	19.52	0.6	6.47	0.36	7.75	0.2	581.7	0.100771		S	1
FJW14_28_4	3600	130	150.1	6.5	2590	110	264.8	9.9	851	33	133.7	6.9	682	32	232	12	19.34	0.96	275	11	53.5	2.2	421	16	93.6	2.9	287	12	39	1.8	243.1	9.2	30.9	1.3	1.33	0.11	12.9	0.39	1931.5	0.0579537		ALK	2
FJW14_28_5	4000	150	150	10	2650	160	266	21	901	91	132.3	8.6	710	67	241	26	20.08	0.72	289	18	56	3.6	437	20	94.1	5.4	312	28	42.9	3.5	249	12	33.7	1.4	1.3	0.2	12.95	0.56	2009.3	0.0566038		UM	1
FJW14_28_6	541	15	107	3	2179	51	105	34	213	59	24.5	4.8	140	20	58.4	3.5	13.51	0.57	131.6	3.7	28.08	0.71	266.5	7	75.9	1.8	279.5	6.9	46.21	0.99	313.2	6.5	46.4	0.79	6.7	0.34	17.71	0.33	482.5	0.0491051		IM	7
FJW14_28_7	1393	50	90.3	4.1	1567	76	153.7	6.5	606	19	110	6	609	33	249.5	7.7	8.43	0.42	290	11	51.4	2.1	316	13	56	2.3	143	4.6	15.47	0.64	68.2	2.8	7.41	0.3	2.01	0.32	10.51	0.59	1478.7	0.057626
FJW14_28_8	1125	13	88.1	1.3	1728	20	144.7	2.1	618.6	8.1	115.9	2	674	11	283.5	5.3	9.72	0.34	325.7	5	57.14	0.58	364.6	5.2	63.49	0.96	150.6	1.9	16.33	0.3	72.9	1.4	7.71	0.16	2.69	0.17	12.64	0.27	1553.2	0.0509838
FJW14_28_9	329.5	9.4	106.1	3.5	2140	110	68.5	3	241	12	45.9	1.9	279	13	145.1	7.7	45.2	1.9	267	12	50.5	2.3	353	14	72.4	3	197.6	7.5	23.6	1	130.2	6.8	19.69	0.8	7.57	0.5	28.7	1.2	634.4	0.0495794
FJW14_28_10	336.8	8.8	108.3	3.1	2653	95	91.9	2.5	321.2	8.8	59.1	2	378	11	191.4	5.3	58.4	1.7	352.2	7.8	62.2	1.7	440	13	90.8	2.4	248.1	6.3	29.7	0.93	170.1	5.4	24.91	0.62	9.31	0.44	38.6	1.2	850.2	0.0408217
FJW14_28_11	444.4	9.8	1481	43	218.2	5.2	2910	67	4020	73	339.1	8	1153	29	122.8	3.1	19.12	0.46	78.6	2	7.79	0.2	39.73	0.95	7.33	0.22	19.37	0.54	2.48	0.1	14.93	0.62	2.404	0.066	148.7	5.2	31.06	0.56	8422.1	6.78735
FJW14_28_12	444	11	1462	43	160.8	4.5	2262	72	2925	87	243.7	8	797	23	89.9	3.2	14.46	0.5	58	1.9	5.63	0.21	29.3	1.1	5.3	0.17	13.88	0.51	1.722	0.086	10.64	0.41	1.701	0.077	86.6	2.8	17.91	0.54	6227.7	9.09204
FJW14_28_13	397	13	158.5	4.8	583	29	31.2	1.6	124.1	6.2	26.8	1.4	199.1	9.5	83.4	3.6	5.85	0.26	114.1	4.7	16.4	0.62	102.5	3.8	21.46	0.85	56.2	1.8	6.79	0.28	40.2	1.7	5.63	0.23	1.39	0.13	4.74	0.15	381.2	0.27187
FJW14_28_14	297.8	6.7	764	16	253.8	8.4	398	10	1339	39	191.2	5.4	829	20	149.4	3.6	27.64	0.71	99.6	2.9	10.51	0.35	51.2	1.3	9.02	0.26	22.47	0.71	2.74	0.1	16.45	0.57	2.258	0.085	3.37	0.21	31.7	1	2757.2	3.01024
FJW14_28_15	445.2	8.6	183.5	4.2	403	11	60.8	1.8	203.9	5	33.9	1.1	196.2	6	61.2	1.5	14.31	0.41	73	1.9	9.99	0.34	64.2	1.9	13.39	0.38	40.1	1.1	5.58	0.17	35.5	1.3	6.54	0.21	1.67	0.12	7.47	0.21	494.8	0.455335
FJW14_28_16	6300	7000	270	260	0.04	0.027	0.015	0.01	0.031	0.022	0.0019	0.003	0.0039	0.0061	0	1	0.0023	0.0036	-7	13	0.0026	0.0041	0.051	0.036	0.0016	0.0024	0.009	0.014	0.0016	0.0025	0.039	0.027	0.078	0.059	0.009	0.0061	0.042	0.03	0.0518	6750
FJW14_28_17	293.7	6.2	325	9.3	1350	31	536	13	2123	55	353	10	1786	39	437	11	23.74	0.7	374	11	46.7	1.3	262.5	6.3	48.1	1.3	122.4	2.9	14.18	0.37	73.1	1.7	9.1	0.21	24.83	0.9	21.87	0.48	4798	0.240741
FJW14_28_18	341.9	7.3	166.4	4.5	727	23	44.2	1.4	201.7	6.1	43.9	1.2	307.6	8.1	113.6	4.1	12.38	0.4	140.6	3.6	18.99	0.58	118.4	3.2	24.14	0.77	67.9	1.9	8.98	0.26	52.4	1.7	8.11	0.2	1.83	0.14	17.11	0.38	597.4	0.228886
FJW14_28_19	629	16	274.5	7.6	1393	48	178.8	6.5	850	31	158.4	6.7	863	30	274	10	29.26	0.93	276.7	8.5	42.9	1.4	278.3	9.6	53.7	1.5	143.5	4.9	18.52	0.63	100.9	3	12.65	0.41	2.59	0.21	23.52	0.73	2050.2	0.197057
FJW14_28_20	473	11	3053	80	462	14	1498	47	3900	110	471	14	2070	54	313.3	8.8	69.3	1.8	203.8	5.5	20.61	0.63	99.1	2.3	16.26	0.41	39.1	1.2	4.29	0.13	24.05	0.69	3.197	0.098	103.4	4.5	18.47	0.53	7939	6.60823
FJW14_28_21	803	22	79.2	2.1	1011	34	15.19	0.67	49.7	1.7	9.01	0.32	67.4	2.9	45.7	1.7	11.34	0.46	123.5	3.2	26.42	0.86	193.3	6.5	35.93	0.87	87.3	2.5	10.8	0.34	60	1.8	8.24	0.26	0.064	0.024	5.75	0.12	141.3	0.0783383
FJW14_28_22	672	18	511	13	991	24	779	24	2170	67	273.6	7.3	1200	35	216.6	6.2	36.42	0.94	193.9	4.4	26.38	0.72	163.1	4.1	34.18	0.99	100.6	2.5	13.95	0.42	91.2	2.3	14.57	0.37	52.2	1.7	54.8	1.2	4422.6	0.515641
FJW14_28_23	215	13	520	14	518	12	149.6	6.5	482	17	90.4	3.5	549	16	135.1	5.5	43.6	2.7	121.7	9.7	14.87	0.62	91.4	5.3	17.6	1.1	45.6	2.6	4.87	0.52	31.6	3.8	4.5	0.44	0.38	0.2	3.95	0.22	1271	1.00386
FJW14_28_24	248.4	6.9	415	12	916	19	684	22	1715	43	235.6	6.6	1109	27	256.1	7.9	32.9	1	241.4	5.6	31.76	0.87	180.3	5.2	31.89	0.71	75.1	2	8.39	0.32	42.6	1.4	5.32	0.27	10.87	0.96	3.37	0.22	3743.6	0.453057
FJW14_28_25	3451	76	232.8	6.3	1370	42	121.1	2.7	454	11	76	2.1	456	14	207.7	5.2	14.65	0.48	273.8	6.8	47.4	1.2	294.3	6.7	55.2	1.3	136.8	2.8	17.83	0.46	104	3.1	13.15	0.33	0.586	0.093	23.84	0.59	1107.1	0.169927
FJW14_28_26	418	12	125	3.6	697	32	36.3	1.4	137.4	5.9	24.6	0.75	166.3	8.7	78	2.4	15.59	0.44	165.7	4.6	31.12	0.97	181.5	5.3	24.59	0.71	32.2	1	1.854	0.081	6.04	0.43	0.521	0.05	1.54	0.36	11.45	0.54	364.6	0.17934
FJW14_28_27	1124	17	639	13	1262	27	177.3	3.8	616	13	109	2.2	616	14	229	5.3	9.87	0.31	262.7	5.8	40.96	0.91	257.7	6.3	47.2	1	121.4	3.5	14.79	0.46	84.6	1.9	10.45	0.27	0.347	0.061	34.06	0.89	1518.3	0.506339
FJW14_28_28	1600	17	89.9	1.3	3245	53	213.2	3.4	719	12	124.2	2.4	770	15	330	7.5	43.81	0.67	513.3	8.6	88.6	1.6	610	12	120.1	2.5	318.8	7	39.69	0.8	223.2	5	27.07	0.55	7.72	0.5	14.73	0.46	1826.4	0.0277042
FJW14_28_29	3052	63	157.7	3.5	2081	46	186.2	5.6	676	17	122.4	3.1	736	17	324.7	7.3	31.61	0.82	400.4	9.3	69.9	1.6	434.5	9.3	76	1.9	192.4	4.1	24.85	0.57	153.5	3.3	19.48	0.41	1.58	0.11	17.92	0.34	1720.6	0.0757809
FJW14_28_30	522	13	337.9	6.9	660	25	1232	29	3050	110	390	17	1533	46	255.6	7	30.39	0.8	196	6.1	23.44	0.58	134.2	3.8	24.63	0.73	64.7	2	8.07	0.38	48.6	1.7	6.79	0.16	43.6	2.4	25.25	0.86	6205	0.51197
FJW14_28_31	228.2	5.2	196.3	4.7	1204	36	443	10	1620	38	288.8	8.3	1458	38	353.8	9.6	36.05	0.71	309	5.9	41.9	1	248.3	4.6	45.2	1.1	119.3	2.9	14.64	0.37	83.3	1.8	11.09	0.25	8.77	0.38	9.34	0.16	3809.8	0.16304
FJW14_28_32	279	6.2	170.9	4.5	155.3	3.6	296.4	7.8	567	16	61	1.4	258.8	7.3	48.8	1.7	6.85	0.24	47.4	1.1	5.43	0.15	29.95	0.85	5.73	0.19	14.83	0.51	1.912	0.079	12.18	0.37	1.977	0.069	13.42	0.5	10.82	0.28	1183.2	1.10045
FJW14_28_33	71.2	1.7	194	5	1151	30	139.8	4.5	662	23	126.9	3.8	753	20	278.3	7.2	7.34	0.23	294.5	6.4	49.9	1.2	286.7	6.8	39.3	1.1	68	1.9	5.03	0.16	19.05	0.76	2.009	0.072	0.038	0.017	56.9	1	1681.7	0.168549
FJW14_28_34	705	14	222.1	4.9	1638	39	57.3	2	211.3	4.7	41.4	1.3	294.6	8.5	145.2	4	11.51	0.3	219.1	4.8	37.44	0.89	263.9	6.2	54.3	1	154.5	3.4	19.62	0.42	106.2	2.7	12.48	0.31	2.96	0.66	7.46	0.21	604.6	0.135592
FJW14_28_35	706	17	228.7	5.3	1591	39	54.8	1.3	204.4	5.5	39.2	0.94	285.7	7.6	138.5	2.7	11.2	0.38	218.5	5.2	36.61	0.88	255.1	5.4	52.9	1.2	150.9	3.3	19.41	0.5	105.4	2.8	12.28	0.25	0.663	0.085	9.04	0.18	584.1	0.143746
Luofengxi Formation, sandstone, early Ordovician, N 25°50'57.56", E 116°19'18.1"
FJW14_21_1	1281	25	72.1	1.3	2275	54	391	7.4	1297	29	202.5	4.7	1044	24	400.5	8.5	10.55	0.23	452	10	78.9	1.5	481.3	8.8	79.7	1.4	156.5	2.8	13.43	0.29	53.6	1.2	5.57	0.16	0.41	0.058	28.74	0.41	2934.5	0.0316923		LM	17
FJW14_21_2	376.9	7.1	122.3	3.6	759	18	158.7	6.5	815	25	173	5	1082	32	437	11	28.36	0.75	468	13	59.5	1.9	255.8	7.7	29.49	0.89	43.8	1.6	3.25	0.18	11.19	0.44	1.084	0.054	0.034	0.015	5.99	0.28	2228.7	0.161133		HM	59
FJW14_21_3	117.5	2.7	152.8	3.1	548	11	233	5.7	617	17	85.2	2.4	428	12	111.5	3.2	3.38	0.14	115.4	2.3	15.74	0.3	93.9	1.6	19.05	0.48	50.7	1.2	6.16	0.15	37.1	1.2	5.42	0.14	2.04	0.12	3.668	0.064	1363.2	0.278832		S	12
FJW14_21_4	203	14	292	19	1046	63	179	17	660	41	108.9	6.8	648	52	208	13	20.2	1.5	202	9.1	30.4	1.7	198	14	37.3	1.3	96.5	4	12.11	0.54	57.6	3.7	6.91	0.37	2.73	0.43	14.04	0.75	1595.9	0.279159		ALK	0
FJW14_21_5	345	6.5	417.1	8.5	690	16	324.2	7	847	19	129.7	3.3	673	15	168.4	4.2	29.48	0.63	180.9	4.1	23.22	0.64	138.2	3	25.34	0.55	63.1	1.5	7.45	0.19	38.45	0.85	5.19	0.11	3.83	0.19	2.057	0.059	1973.9	0.604493		UM	10
FJW14_21_6	386	15	420	13	267	13	72.5	2.4	200	12	32.2	2.2	169	14	47.4	5.9	17.2	1.7	52.8	4.2	6.8	0.62	44.5	4.2	8.97	0.83	24.6	2.5	3.15	0.52	19.4	2.1	3.54	0.41	5.4	1.4	11.07	0.99	473.7	1.57303		IM	42
FJW14_21_7	168.9	6.1	3040	110	305	13	280.9	8.9	935	32	149.9	5.2	795	27	167.4	5.5	28.59	0.91	132	5.6	12.89	0.31	60.1	1.8	10.24	0.33	24.21	0.75	2.79	0.14	15.18	0.7	2.353	0.097	2.29	0.14	16.31	0.55	2160.8	9.96721
FJW14_21_8	500	11	357.4	7.5	163	4.4	146.3	3.7	369	7.6	52.1	1.5	260	7	58.7	1.4	8.92	0.31	51.4	1.5	5.75	0.18	29.65	0.8	5.55	0.15	14.18	0.36	1.576	0.059	9	0.41	1.432	0.052	0.387	0.047	6.52	0.17	827.4	2.19264
FJW14_21_9	1332	24	106.1	2.5	3240	110	84.2	2.6	287.2	7.6	53.9	1.3	371.7	9.1	177.6	4.6	8.69	0.29	301.8	7.5	56.6	1.7	445	12	103.7	3	332	10	47.4	1.7	289.8	9.9	38	1.6	0.152	0.044	2.27	0.18	797	0.0327469
FJW14_21_10	144.2	2.9	5920	140	562	15	801	21	2337	67	331.9	7.6	1636	43	336.6	8.5	72.8	1.8	242.5	6.2	26.24	0.71	127.5	3.3	19.38	0.47	42.7	1	4.89	0.17	24.91	0.86	3.14	0.11	12.57	0.5	20	0.43	5105.9	10.5338
FJW14_21_11	653	13	387	9	302.6	7.5	596	15	1390	31	146.7	3.1	571	15	89.4	2.8	11.97	0.31	76	1.8	8.75	0.22	49	1.1	9.83	0.25	25.78	0.72	3.43	0.11	21.25	0.73	3.67	0.11	65.6	1.8	12.58	0.27	2703.7	1.27892
FJW14_21_12	252.2	6.2	81.3	2.2	4540	100	1010	52	3200	110	507	16	2654	76	710	19	46.88	0.91	794	15	123	2.1	814	18	165.6	2.8	460.5	8.5	63.1	1.4	367.6	7.5	50.36	0.81	60.6	1.7	24.05	0.46	7371	0.0179075
FJW14_21_13	472	11	376.8	9.5	88.3	4.8	376	15	601	27	52.6	2.9	195	11	29.4	1.9	3.56	0.34	27.7	1.5	2.75	0.15	15.7	1.1	2.89	0.17	7.79	0.49	0.94	0.13	5.19	0.45	0.907	0.079	13.2	1	4.57	0.29	1224.6	4.26727
FJW14_21_14	444.8	9	623	13	27.8	1.3	66.1	3.1	152.5	5.3	17.06	0.82	76	3.4	11.49	0.68	1.93	0.12	9.42	0.43	0.878	0.053	4.53	0.24	0.814	0.051	2.17	0.13	0.276	0.026	1.99	0.15	0.36	0.022	0.682	0.06	2.773	0.074	311.66	22.4101
FJW14_21_15	683	13	159.6	3.4	2042	49	81.3	2.2	288.4	5.6	53.2	1.1	341.1	7.5	180.7	4	14.77	0.39	330.3	6.2	60.3	1.3	417.4	7.3	80.9	1.8	200.6	3.9	22.57	0.53	114.1	2.7	12.81	0.26	2.59	0.18	14.72	0.4	764	0.0781587
FJW14_21_16	640	21	261.3	9.4	257.2	9.1	163.3	5.1	646	21	103.2	3.8	534	19	121.1	4	27.67	0.81	97.2	3.5	10.78	0.29	54.2	1.8	9.66	0.26	22.42	0.53	2.68	0.11	14.71	0.69	2.092	0.078	0.849	0.085	10.25	0.25	1446.5	1.01594
FJW14_21_17	693	16	267.9	6.8	259.2	6.3	172.8	3.7	687	13	110.6	3.1	581	16	121	3.8	27.68	0.69	96.8	3.1	10.88	0.29	55	1.5	9.53	0.26	22.19	0.54	2.65	0.11	13.98	0.56	1.904	0.077	0.92	0.086	8.94	0.21	1551.4	1.03356
FJW14_21_18	386.4	8.4	92.5	2.8	1631	51	12.8	1.8	27.2	1.9	4.69	0.35	30.6	1.9	27	1.4	6.8	0.29	93.5	3.5	23.92	0.91	221.2	8.8	57.7	2.1	192.5	7.7	28.3	1.2	175.9	8.5	24.5	1.2	6.41	0.81	9.15	0.9	75.29	0.0567137
FJW14_21_19	599	10	201	4	903	23	43.2	1.4	241.4	5.1	51.8	1	336.7	7	166.6	3.7	21.32	0.56	216.6	4.4	38.02	0.7	230.5	5	37.65	0.83	83.3	1.7	9.13	0.19	44	1.4	4.76	0.12	0.177	0.085	37.46	0.57	673.1	0.222591
FJW14_21_20	610	17	220.9	5.2	1393	61	429	24	1111	67	151	11	757	46	216	10	12.9	0.64	230	13	34.1	1.9	230	12	47.9	2.6	146.7	7.3	21.6	1.1	138.7	5.6	23.87	0.73	44.7	2.1	39	1.4	2448	0.158579
FJW14_21_21	623.2	8.3	233	3.7	996	33	389	20	914	35	119.7	4.4	573	25	145.9	7.7	10.04	0.29	159.2	8.3	23.4	1.1	153.3	6.2	33.4	1.4	101.2	3.2	15.08	0.42	100.1	2.3	16.92	0.33	45.5	1.5	36.44	0.61	1995.7	0.233936
FJW14_21_22	490.5	9.2	504	12	2527	64	328	7.6	1049	24	171.1	5.5	924	30	237.1	6.9	25.32	0.69	291.6	5.1	52.4	1.3	408.1	9.1	97.4	1.8	285.5	6.1	35.09	0.75	189.7	5.2	24.45	0.66	12.14	0.44	17	0.32	2472.1	0.199446
FJW14_21_23	280.4	5.9	156.1	3.9	623	17	160.8	4.2	543	14	92	2.3	501	14	151.9	4.2	22.06	0.5	154.1	3.4	21	0.44	122.5	3.4	21.06	0.36	50.9	1.2	5.93	0.11	31.86	0.94	4.07	0.12	4.4	0.23	23.41	0.46	1296.8	0.250562
FJW14_21_24	163.7	3.1	164.6	3.6	1367	29	312.9	6.1	1228	31	224.7	5.4	1355	30	380.3	9.7	55.2	1.1	380	7.2	48.9	1	283.2	4.9	51.9	0.9	129.6	2.1	15.47	0.35	81.5	1.6	10.45	0.21	1.71	0.12	5.39	0.11	3120.6	0.12041
FJW14_21_25	389.7	9.1	99.1	2.5	872	25	122.1	3.1	541	17	104.9	3.5	634	21	283.7	7.7	11.06	0.29	333.1	6.4	49.56	0.9	240.1	5.2	30.13	0.77	50.3	1.2	4.58	0.15	19.69	0.66	2.006	0.069	2.61	0.18	7.83	0.26	1402	0.113647
FJW14_21_26	1617	31	114.5	2.8	276.4	7.9	275.1	6.9	1159	29	178.5	4.3	973	25	269.2	7.2	15.35	0.42	219.7	4.9	21.32	0.53	81.7	2.2	8.98	0.19	14.26	0.52	1.074	0.06	4.19	0.28	0.423	0.029	0.13	0.032	6.68	0.16	2585.6	0.414255
FJW14_21_27	272.6	6.4	3449	74	301.9	8.1	252.2	7.7	839	22	126	3	562	14	120.3	3.9	22.64	0.56	88.4	2.1	10.02	0.26	53.3	1.4	9.18	0.27	21.71	0.61	2.379	0.077	11.86	0.43	1.454	0.057	13.97	0.57	14.18	0.29	1779.2	11.4243
FJW14_21_28	482	12	619	16	623	18	1165	37	2838	79	368	12	1574	50	265.2	7.1	55.1	1.4	192.3	4.3	21.93	0.61	121.5	2.4	22.01	0.62	56.6	1.7	7.21	0.23	41.7	1.2	6	0.15	28.9	1.9	18.69	0.34	5945	0.993579
FJW14_21_29	309	6.2	293	6.6	680	15	489	15	1191	27	164.5	4.5	815	18	195.2	5.8	23.23	0.65	186	4.2	23.88	0.62	137.6	3.2	24.3	0.63	59.5	1.4	6.57	0.18	35.98	0.98	4.34	0.12	7.16	0.26	2.317	0.042	2659.5	0.430882
FJW14_21_30	658	16	305.7	7.1	751	19	534	13	1662	36	238	4.3	1143	25	246.5	4.7	29.54	0.5	201.2	4.4	25.25	0.62	145.7	2.3	27.64	0.59	71.9	1.6	9.12	0.2	54.5	1.3	7.62	0.16	15.82	0.34	15.25	0.26	3577	0.407057
FJW14_21_31	599	11	299.2	6.2	429	14	467	11	1261	36	161.5	3.6	709	20	130.8	5.4	21.91	0.58	98.6	3.2	12.22	0.4	70.1	2.2	13.37	0.49	38.5	1	5.02	0.19	31.7	1.2	4.76	0.14	20.08	0.55	7.69	0.36	2598.5	0.697436
FJW14_21_32	542	12	123.7	4	1198	45	169.1	5.6	604	15	107.6	3.1	656	14	322.8	7.5	17.06	0.5	449	12	69	1.9	337.8	8.4	42.1	1.2	83.1	2.4	10.01	0.26	57.7	1.6	7.55	0.18	7.94	0.38	27.71	0.64	1536.7	0.103255
FJW14_21_33	164.1	3.8	94.8	2.4	836	23	400.9	9	1605	42	286.9	7.7	1677	39	713	17	8.36	0.31	729	16	74	2	281.6	6.5	33.24	0.82	62.2	1.5	5.37	0.17	25.58	0.82	3.03	0.1	7.38	0.26	39.93	0.91	3969.8	0.113397
FJW14_21_34	407	28	269	5.7	2728	92	407	27	1684	86	309	17	1793	90	534	23	87.2	2.8	538	24	74.5	3.7	480	17	88.3	3.7	253.1	8.5	32.6	2.1	202.3	9.3	29.7	1.1	68.6	3.1	28.67	0.82	4193	0.098607
FJW14_21_35	244	5.1	316.4	7.7	1239	32	412.9	9.1	1327	34	226.2	6.1	1206	32	335.9	7.9	31.35	0.8	299.4	6.9	38.01	0.97	219.3	6.1	42.5	1	118.7	2.6	15.85	0.47	96.6	2.5	13.8	0.39	47.8	1.5	29.29	0.69	3172.1	0.255367
FJW14_21_36	514	11	1185	26	635	18	124.9	3.2	622	17	144.4	4	1009	25	345	9.1	71	1.6	292	7.2	30.93	0.74	146	3.4	23.23	0.53	55	1.3	6.61	0.2	37.94	0.98	5.35	0.16	1.19	0.091	6.72	0.11	1900.3	1.86614
FJW14_21_37	684	16	122.1	2.7	1525	47	348	8.9	1821	48	372	12	2130	40	758	19	33.71	0.95	744	14	93.4	2.1	450.9	9.5	56.3	1.5	91.1	2.9	7.39	0.28	24.98	0.74	2.806	0.084	30.8	1	41.97	0.8	4671	0.0800656
FJW14_21_38	448	10	197.9	4.3	1966	94	98.8	3.2	407	17	83.8	3.3	562	20	245.3	9.9	39.9	1.1	325	13	52.3	2.3	339	16	70.2	3	191.9	9.5	24.7	1.2	143.5	6.9	21.73	0.94	57.5	4.9	22.7	0.98	1151.6	0.100661
FJW14_21_39	441.4	6.6	198	4.3	2812	65	128.1	3	547	11	115.9	2.2	797	20	348.8	7.8	52.3	1.2	462.9	9.1	73	1.6	487.9	9.6	101.4	1.9	277.5	5.5	35.38	0.72	201.1	3.7	31	0.6	109.8	2.6	45.91	0.97	1588	0.0704125
FJW14_21_40	417.9	7.6	120	3.2	3259	94	412	10	1121	24	217.3	5.6	1210	30	392.7	9	44.7	1.2	468	14	78.1	1.8	541	15	117.5	2.5	348.9	6.8	50.4	1.3	312.3	7.8	43.17	0.82	1.07	0.12	28.12	0.67	2960.3	0.0368211
FJW14_21_41	713	16	54.6	1.4	3710	130	285.7	7.4	860	21	134.8	3.3	751	16	319.1	7.9	8.57	0.29	492	12	98.7	2.3	727	17	142.1	3.4	372.4	8.9	50.5	1.2	288.4	6.7	33.73	0.76	10.86	0.43	18.75	0.54	2031.5	0.014717
FJW14_21_42	1575	28	85.5	1.7	1553	42	227.2	6	847	22	125.4	3.2	546	15	226.3	5.6	1.92	0.1	221.6	4.2	50.9	1	333.2	7.7	50.7	1	125.5	3.1	17.31	0.39	99.3	2.2	10.48	0.22	4.65	0.2	5.69	0.11	1745.6	0.0550547
FJW14_21_43	254.4	6.5	790	21	1129	34	215.6	6.3	719	28	116.5	3.8	670	28	220.3	7.6	39.24	0.9	249.4	8.3	34.41	0.95	208.6	6.5	39.8	1.2	102.4	3	12.92	0.36	70.2	2	9.37	0.28	5.08	0.29	11.16	0.38	1721.1	0.699734
FJW14_21_44	2548	58	144.8	3.5	2811	64	113.9	2.6	595	11	120.4	2.3	728	16	337.9	6.4	10.54	0.26	451.4	8	85.6	1.8	609	12	120.7	2.5	322.7	7	36.5	0.74	183.9	4.3	21.44	0.46	3.13	0.16	13.31	0.31	1557.3	0.0515119
FJW14_21_45	613	10	288.2	7.1	1114	26	39.17	0.92	206.4	5.8	44.8	1.3	312.1	8.3	173.7	3.9	38.11	0.72	273	6.3	48.8	1.3	308.4	7.6	48.5	1.1	99.5	2.1	9.66	0.23	45.5	1	5.13	0.11	2.76	0.56	10.73	0.19	602.47	0.258707
FJW14_21_46	195.4	3.9	231.7	5.1	1130	24	224.1	6.7	1151	38	200.9	4.4	1142	36	295.4	6.1	31.63	0.65	282.1	5.7	37.3	0.8	216.4	3.8	39.89	0.88	105.3	2.2	13.93	0.31	83.1	1.8	11.16	0.25	10.23	0.59	4.121	0.087	2718	0.205044
FJW14_21_47	172.5	3.3	690	12	514	15	1370	330	2710	510	312	53	1210	150	194	13	29.2	1.6	154.2	7.3	17.67	0.53	100.5	2.6	17.74	0.59	43.4	1.2	4.98	0.16	26.22	0.91	3.28	0.1	12.83	0.54	5.27	0.11	5602	1.34241
FJW14_21_48	91.6	3.5	201.6	9.7	224.6	8.6	239	9	673	24	91.9	3.4	401	18	76.9	3.3	6.56	0.26	64	2.4	7.68	0.23	43	1.4	7.74	0.34	20.67	0.84	2.392	0.094	14.24	0.37	1.865	0.071	107.6	4.2	20.66	0.57	1404.9	0.897596
FJW14_21_49	2000	39	66	2.6	1550	31	109.8	2.7	378	11	61.8	1.6	350.2	9.4	153.8	3.6	9.11	0.26	215.4	5.2	42.9	1.1	296.9	6.7	55.5	1.2	144.2	2.9	18.51	0.39	98.3	2.7	11.4	0.28	1.14	0.21	3.011	0.093	899.8	0.0425806
FJW14_21_50	600	14	385	12	568	13	114	2.9	349.6	9.6	61.5	1.5	402	11	142.1	3.6	25.67	0.75	150.6	4	19.82	0.44	111.6	3.1	20.14	0.42	50.5	1.2	6.44	0.16	36.3	1.1	4.81	0.14	3.06	0.18	13.97	0.43	927.1	0.677817
FJW14_21_51	184.1	2.7	8609	95	187.2	4.1	710	12	1764	26	218.7	4.2	929	20	161.2	3.1	34.11	0.92	101.3	2.5	9.15	0.24	39.6	1.2	6.24	0.18	13.66	0.43	1.395	0.079	7.63	0.43	1.015	0.049	14.4	1.1	6.22	0.31	3621.7	45.9882
FJW14_21_52	355	10	68.4	2.2	897	28	115.5	4.8	485	15	97.9	4.5	563	20	205.6	7.3	10.24	0.38	224.7	7.2	31.6	1.1	184.1	5.6	31.08	0.86	68.9	2	5.98	0.21	23.22	0.86	2.216	0.083	0.024	0.014	3.42	0.14	1261.4	0.0762542
FJW14_21_53	244.2	5.8	179	3.7	689	16	309.3	8.9	1253	33	235.7	6.6	1404	34	475	12	16.36	0.48	454.6	7.5	49.8	0.83	230.6	5.2	29.35	0.75	46.4	1.2	3.06	0.11	9.52	0.35	0.817	0.041	0.371	0.061	3.469	0.088	3202	0.259797
FJW14_21_54	403.1	7.1	117.6	4.4	738	18	126	3.4	615	16	121	2.8	735	19	346	10	9.71	0.38	438	8.1	61.4	1.1	243.7	5.7	29.5	0.65	56.3	1.2	5.09	0.15	20.24	0.68	2.01	0.064	0.023	0.014	18.79	0.25	1597	0.15935
FJW14_21_55	211.9	4.6	5850	120	105.2	3.6	411.2	9.2	1027	25	130.9	3	602	13	99.8	3.2	18.64	0.51	62.4	1.5	4.94	0.17	21.96	0.77	3.46	0.11	7.3	0.32	0.76	0.043	4.12	0.19	0.618	0.026	2.34	0.16	4.31	0.11	2171.1	55.6084
FJW14_21_56	545.1	8.7	504	10	188.1	3.5	156	3.8	400.5	8.3	57.9	1.1	290	7.4	66	1.8	10.68	0.28	54.9	1.4	5.68	0.17	29.69	0.8	5.17	0.13	13.52	0.42	1.793	0.067	11.08	0.37	1.648	0.062	1.136	0.088	11.2	0.24	904.4	2.67943
FJW14_21_57	345.5	7.2	1236	32	180.6	5	529	12	1307	36	170.2	3.6	758	22	137.4	3.9	24.08	0.69	91.8	2.4	9.25	0.25	42.3	1.4	6.28	0.18	13.49	0.32	1.459	0.061	8.16	0.31	1.09	0.044	10.4	0.32	11.29	0.22	2764.2	6.84385
FJW14_21_58	1031	24	148.4	4.7	1391	39	142.2	4.5	555	16	91	2.5	503.6	9.8	211.6	5.8	8.91	0.25	299.8	6.3	57	1.1	340.2	9.1	50.2	1	103.6	2.5	10.78	0.38	50.5	1.3	5.16	0.14	0.088	0.041	5.06	0.13	1291.8	0.106686
FJW14_21_59	413	12	43.7	1.2	1751	34	3.72	0.21	17.21	0.53	4.29	0.17	40.1	1.7	39.3	1.6	34.34	0.73	126.9	3.3	31.52	0.6	268	5.7	61.1	1.2	161.9	3.1	18.19	0.37	83.7	1.9	9.02	0.18	0.683	0.086	11.21	0.31	65.32	0.0249572
FJW14_21_60	232	5.6	9030	200	288.7	7.6	1602	45	2809	71	297.4	8.6	1153	27	175.5	5.6	28.69	0.74	121.7	2.7	12.2	0.31	59.9	1.6	10.05	0.28	24.14	0.66	2.8	0.11	16.89	0.52	2.521	0.072	65.7	3.8	34	1.6	5861.4	31.2781
FJW14_21_61	441.8	8.5	367	6.4	1640	30	193.8	4.1	779	15	147.6	2.7	896	18	290.4	6.3	51.52	0.97	332.5	7.7	47.88	0.88	304	5.5	59.6	1.1	157.4	3	19.98	0.38	108.7	2.4	14.85	0.31	1.08	0.12	43.3	1.1	2016.4	0.22378
FJW14_21_62	1888	48	86	2.2	1887	56	103.1	2.6	476	14	98.5	2.7	621	16	319.7	8.8	34.82	0.98	392.7	9.6	70	1.8	444	12	80	2	192.5	4.4	22.29	0.71	108.3	2.5	11.68	0.31	0.052	0.027	21.53	0.54	1298.6	0.045575
FJW14_21_63	443	11	158	4.4	538	13	1112	29	2845	59	346.4	7.2	1452	36	227.3	5	10.44	0.32	163.2	4.5	19.34	0.5	104.9	2.7	19.16	0.46	48.9	1.1	5.93	0.17	33	1.2	4.73	0.12	12.71	0.46	1.663	0.048	5755.4	0.29368
FJW14_21_64	1171	21	611	16	549	17	139.9	4.1	531	16	92.8	2.6	575	14	171.7	3.5	25.29	0.58	180.4	2.9	21.63	0.46	118.6	2.7	20.23	0.47	45.7	1.1	4.71	0.11	23.52	0.84	3.2	0.15	0.088	0.035	7.4	0.24	1338.7	1.11293
FJW14_21_65	370.3	9.4	452.7	9.3	191.2	4.8	315.5	9.1	771	19	93.1	2.5	409	11	74.1	2.3	18.54	0.42	61.4	1.6	7.25	0.16	39.15	0.94	7.1	0.24	17.9	0.54	2.1	0.096	12.29	0.35	1.771	0.054	8.59	0.36	6.69	0.15	1588.6	2.36768
FJW14_21_66	505.3	8.7	2028	51	461.6	9.3	344.4	9	1269	35	197.7	4.5	1007	20	207.5	4.8	38.71	0.78	155	2.8	18.03	0.41	94.8	2	16.3	0.41	41.1	1.1	5.22	0.12	29.7	1	4.27	0.11	2.49	0.16	8.38	0.17	2818.1	4.39341
FJW14_21_67	504	20	235.4	9.7	299	13	32.5	1.6	117.5	5.3	21.44	0.91	138.9	7.5	47.4	2.4	11.93	0.55	59.3	2.2	8.62	0.32	53.9	2.3	11.22	0.31	31.4	1.1	3.97	0.16	25.6	1.3	4.19	0.18	1.22	0.15	5.71	0.22	310.34	0.787291
FJW14_21_68	511.5	7.5	303.5	7.9	1047	22	107.6	3.9	411	13	73.8	1.6	474	15	165.4	5.1	43.7	1.4	213.5	7	29.98	0.72	192.6	5.1	39.8	0.8	109.2	2.3	14.66	0.36	98	2.5	15.58	0.38	10.64	0.45	34.06	0.96	1066.4	0.289876
FJW14_21_69	312	11	220.5	5	1910	100	83.2	5	360	15	74	2.5	497	22	213	11	5.51	0.27	262	12	45.6	1.6	321	14	63.6	3	184.9	7.1	25.35	0.92	146.9	6.9	17.24	0.73	9.1	0.92	30.6	2	1014.2	0.115445
FJW14_21_70	1494	37	86.5	1.4	2653	55	269.1	6.6	975	23	158.9	3.4	845	21	337.1	8.3	8.41	0.32	427.2	7.6	81.8	1.8	561	13	101.4	2.1	265.8	5.8	34.45	0.95	203.7	5.2	25.3	0.59	9.52	0.46	51.1	1.2	2248	0.0326046
FJW14_21_71	413.4	6.5	164.7	3.3	1681	30	131.8	2.8	573	13	104.5	2.4	596.1	9.9	249.8	4.1	9.52	0.2	325	5.5	54.84	0.94	338.5	6.6	59.9	1.1	149.7	2.9	18.67	0.32	102.3	2	13.1	0.31	0.59	0.25	18.15	0.45	1405.4	0.0979774
FJW14_21_72	269.2	4.6	199.2	3.5	243.5	5.8	476	11	1668	33	270.1	7.2	1454	27	444.7	9.2	8.79	0.24	386.9	8	35.62	0.64	118	2.4	11.12	0.24	12.24	0.36	0.598	0.032	2.03	0.11	0.232	0.018	0.119	0.029	27.51	0.46	3868.1	0.81807
FJW14_21_73	269	8.2	279	12	1380	70	2930	130	6540	290	674	33	2610	120	429	22	27.7	1.2	341	11	43.3	1.7	263	10	50.8	2.2	142.4	6.6	17.86	0.81	112.4	5	16.04	0.74	241	13	46.5	2.4	12754	0.202174
FJW14_21_74	632	13	89.2	2.6	2111	49	72.8	3	269.3	6.7	50.3	1.5	339.5	9.8	201.3	4.5	15.8	0.58	304.9	6.7	55.1	1.4	376.9	9.8	73.9	2.1	200	4.5	26.81	0.6	148.7	4.7	19.29	0.48	0.335	0.051	1.83	0.097	731.9	0.0422549
FJW14_21_75	238	5.7	304.2	7.8	604	13	404	11	1052	27	139	3.6	676	17	159.1	3.9	16.35	0.47	157	3.6	20.41	0.5	119.5	3	22.31	0.53	56.6	1.5	6.5	0.16	35.39	0.85	4.46	0.1	10.59	0.34	8.63	0.25	2271	0.503642
FJW14_21_76	586	14	718	17	119.4	3.5	308.5	8.9	531	13	51.4	1.2	213.1	6.5	34.5	1.3	7.87	0.3	31.5	1	3.84	0.13	21.88	0.81	4.15	0.14	11.52	0.36	1.419	0.067	9.62	0.4	1.509	0.061	3.65	0.19	3.44	0.1	1104	6.0134
FJW14_21_77	248	5.3	2578	71	176.3	4.3	1491	37	2650	69	246.4	6	910	20	121.9	3.6	28.71	0.71	83	2.3	7.63	0.21	34.86	0.99	5.78	0.18	13.14	0.4	1.545	0.073	8.77	0.37	1.458	0.057	55	1.8	12.38	0.35	5297.4	14.6228
FJW14_21_78	1322	27	54.8	1.3	2491	48	189	3.6	764	18	138.1	3	798	25	441	11	11.23	0.32	679	13	129.1	2.7	708	14	88.6	2	140.8	2.8	11.05	0.29	43.14	0.96	4.03	0.12	5.7	0.21	11.12	0.24	1889.1	0.0219992
FJW14_21_79	276	6.8	642	19	693	20	211.1	6	1066	36	187.9	5.8	1029	26	262.9	6	33.1	1.1	210.1	7	25.68	0.73	141.1	3.5	24.87	0.6	61.8	2.3	7.63	0.24	42.1	1.3	5.68	0.21	1.57	0.14	16.36	0.45	2494	0.926407
FJW14_21_80	217.1	8.5	235.7	8.9	728	33	954	45	2970	170	471	22	2580	120	559	27	86.3	2.8	376	15	38.7	1.7	186.4	7.4	27.5	1.3	58	2.8	6.11	0.29	30.2	1.5	3.7	0.21	1.23	0.15	3.96	0.23	6975	0.323764
FJW14_21_81	142.5	5.8	228	11	174.4	6	292	12	528	25	54.8	2.2	236	11	43.4	1.8	8.42	0.39	42.3	1.9	5.64	0.21	34.9	1.3	6.64	0.2	17.84	0.95	2.22	0.11	12.98	0.63	1.794	0.081	29.6	1.5	14.09	0.43	1110.8	1.30734
FJW14_21_82	209.9	6	752	21	526	15	589	16	1370	46	189.5	6.7	855	25	178.2	5.3	31.06	0.83	159.5	4.4	19.44	0.69	111.3	2.3	20.12	0.53	48.1	1.7	5.43	0.17	28.39	0.84	3.55	0.16	13.33	0.47	4.26	0.1	3003.5	1.42966
FJW14_21_83	175.1	3	217	4.4	1453	26	649	15	2354	48	360.9	7.1	1763	31	393.4	8.3	33.27	0.78	356.1	8.5	47.45	0.99	286.5	5.8	52.29	0.89	134	3.1	16.21	0.28	92.4	2	12.18	0.26	0.227	0.048	1.656	0.04	5126.9	0.149346
FJW14_21_84	251.7	5.5	553.4	9.7	488	17	456	15	1312	44	160.9	4.9	709	19	137.7	4.4	20.34	0.58	118.3	3.5	14.45	0.37	79.2	2.4	15.51	0.49	43.5	1.2	6.3	0.23	39.8	1.2	6.17	0.18	62.6	3.6	25.4	1	2637.9	1.13402
FJW14_21_85	320.4	6.3	98.8	2.4	2048	54	87.2	2.3	295.4	7.4	50.7	1.4	335	11	185.9	4.7	31.28	0.73	349.7	9.9	61.1	1.7	411	10	75.3	1.8	175.3	4.1	18.2	0.42	84.7	2.2	10.33	0.23	23.76	0.77	56.3	1.3	768.3	0.0482422
FJW14_21_86	202.3	2	302.6	3.6	603.5	9.4	238.8	2.9	837.3	8	141.5	1.8	802	10	216.4	4.1	14.74	0.29	188.4	2.5	22.44	0.42	124.3	1.9	22.02	0.39	52.03	0.97	5.9	0.16	28.91	0.74	3.679	0.085	1.21	0.24	6.33	0.11	2019.6	0.501408
FJW14_21_87	882	22	175.2	3.8	2075	46	94.3	2.5	282	6.9	45.7	1.2	266.1	6.8	134.4	4	10.89	0.33	213.9	4.8	42.32	0.9	321.1	5.8	68.5	1.6	202.9	4.1	29.94	0.59	200.9	5.3	28.37	0.65	0.743	0.083	5.56	0.18	688.1	0.0844337
FJW14_21_88	386.3	5	1295	15	560.9	5.7	379.3	7.8	1526	23	252.6	3.3	1288	20	297.4	5.8	52	1.2	204.5	4.3	23.75	0.7	119.5	3	19.46	0.46	47.3	1.2	5.32	0.17	30.7	1.2	4.35	0.2	1.87	0.32	15.54	0.27	3445.9	2.30879
FJW14_21_89	379	21	1235	68	582	33	355	16	1549	93	249	18	1341	91	308	17	55.4	2.6	215.7	9.7	25	1.7	127.1	8.5	20.99	0.97	51.3	2.3	6.11	0.37	34.5	1.8	4.97	0.27	1.87	0.24	18.32	0.95	3494	2.12199
FJW14_21_90	660.5	7.1	100.6	2.8	4103	89	109.6	3.3	370	11	65.1	1.9	424	13	211.1	5	19.43	0.49	386.3	7.9	76.9	1.7	618	14	141.1	2.6	440.1	9.9	64.9	1.5	401	10	54.3	1.2	38.4	2.8	21.29	0.94	968.7	0.0245186
FJW14_21_91	744	15	249.1	5.1	2082	50	328	10	1132	27	210.4	5.3	1264	30	447	11	24.38	0.81	416.8	8.8	57.5	1.1	334.7	7.9	59.1	1.4	150.2	3	18.82	0.38	102.7	2.2	12.87	0.29	63.4	2.8	37.3	1.4	2934.4	0.119645
FJW14_21_92	722	16	262.7	7.4	1918	58	260.6	8.4	960	23	187.6	5.8	1216	35	451	11	26.5	1	437	12	58.1	1.7	330.8	9.6	56.5	1.2	137.7	3.7	15.98	0.41	83.4	2.2	10.48	0.26	36.2	1.8	10.03	0.65	2624.2	0.136966
FJW14_21_93	378.4	7.9	167.3	3.4	2037	42	282	16	1054	53	181.6	8.8	1044	42	394	15	20.88	0.76	477	11	70.9	1.5	424.3	7.7	75.8	1.7	182.2	3.8	21.07	0.53	107.7	1.8	13.75	0.29	2.79	0.16	59.4	1	2561.6	0.0821306
FJW14_21_94	2011	46	407	11	1567	39	575	13	1646	37	228.2	5.6	1064	31	323	8.6	5.69	0.21	371.2	8.6	59.8	1.3	356.4	7.9	60.5	1.6	143.9	3.3	15.94	0.32	81.3	2.3	9.57	0.29	1.86	0.14	15.34	0.3	3513.2	0.259732
FJW14_21_95	348	11	160.6	7	897	36	137.6	4.8	441	14	66.7	2.4	355	12	112	3.2	18.67	0.59	146.5	4.3	21.21	0.6	136.7	3.7	28.48	0.82	81.9	3.2	10.2	0.42	60.2	1.8	9.7	0.29	15.52	0.74	27.8	0.75	1000.3	0.179041
FJW14_21_96	317.2	7.1	279	7.1	1036	23	467	12	1196	31	158.8	4.2	745	20	160.8	4.1	34.12	0.86	167.3	3.9	26	0.51	179	4.7	37.27	0.94	116.1	2.5	16.44	0.44	107.6	2.8	15.37	0.33	49.8	1.3	76.4	1.8	2566.8	0.269305
FJW14_21_97	764	20	140.4	4.6	2257	70	199.6	7.6	705	20	116.3	4	649	25	247.8	8.6	8.15	0.32	317	8.4	56	1.7	401	12	86.3	2.6	254	6.3	33.1	1.1	190.3	6.1	24.9	0.56	6.36	0.31	19.31	0.39	1669.9	0.0622065
FJW14_21_98	474	11	175.5	5.6	3860	220	622	34	2250	120	388	16	2233	90	790	32	38.7	1.6	893	40	136.7	5.6	828	36	149	7.2	359	16	38.5	1.7	187.6	8.4	21.25	0.85	81.6	6.3	68	4.2	5493	0.0454663
FJW14_21_99	22.32	0.7	357.1	7.3	56.5	2.2	40.3	1	92.8	2.4	12.67	0.56	58.8	2.3	14.35	0.67	2.45	0.1	13.34	0.59	1.729	0.07	10.41	0.45	1.836	0.085	4.07	0.17	0.452	0.04	2.02	0.13	0.252	0.02	2.86	0.77	11.9	0.43	204.57	6.32035
FJW14_21_100	471	13	283.5	7.4	1643	71	82.9	2.3	373	12	69	1.7	425	12	193.8	5.7	6.24	0.35	266	9	47.3	1.4	306.1	9.4	59.2	2.3	164.9	5.2	20.34	0.71	114.7	5.7	13.96	0.59	3.52	0.39	8.7	0.55	949.9	0.17255
FJW14_21_101	186.7	3.9	81.7	1.5	1678	36	1633	38	4093	83	527	11	2422	49	515	11	17.13	0.41	457.1	7.8	60.3	1.2	351.6	6.3	63.7	1.3	154.1	2.6	17.27	0.4	90.3	2	11.24	0.24	9.23	0.29	3.846	0.097	8675	0.0486889
FJW14_21_102	1422	26	176	2.7	1758	32	119.5	2.4	500.2	8.3	90.1	2.2	504	11	203.2	4.9	15.73	0.41	253.2	3.7	45.89	0.71	317.8	4.1	64.8	1	178.7	2.2	22.39	0.46	112.2	2	12.52	0.19	2.21	0.56	9.97	0.18	1213.8	0.100114
FJW14_21_103	914	16	146.5	2.8	1687	41	50.7	1.1	190.3	4.2	38.55	0.9	274.8	5.5	139.8	3.2	12.28	0.33	213.7	3.9	36.24	0.61	255	4.3	57.7	1.1	168.9	3.3	21.51	0.42	118.8	2.7	16.5	0.32	0.732	0.071	5.55	0.17	554.35	0.0868405
FJW14_21_104	459.9	8.1	264.3	5.3	1162	27	950	25	2992	66	435	10	2177	47	526	11	35.71	0.83	414.7	8.8	49	1.1	257.3	4.9	43.61	0.88	100.5	2.2	11.95	0.27	65.1	1.4	8.71	0.19	20.97	0.75	51.91	0.94	6554	0.227453
FJW14_21_105	420	11	204.9	4.8	669	16	288	15	820	41	121.5	4.8	647	19	158.1	5.1	13.28	0.44	146.4	3.7	20.61	0.47	125.8	2.5	23.33	0.55	61.9	1.7	8.2	0.22	49.2	1.1	6.46	0.17	15.47	0.59	5.63	0.15	1876.5	0.306278
FJW14_21_106	486.6	8.9	2867	69	247.6	5.2	189.1	5.1	821	21	140.7	4.2	769	18	165.7	5	31.58	0.97	116	3.1	12.09	0.26	56.4	1.5	8.81	0.22	19.88	0.6	2.284	0.079	11.97	0.38	1.59	0.056	0.239	0.041	6.94	0.21	1919.8	11.5792
FJW14_21_107	556	14	627	21	1562	66	860	36	2770	130	448	16	2230	86	499	25	74.4	4.4	418	19	54.5	2.7	313	17	59.4	3.1	154.2	8.3	21	1.1	126	7.5	16.83	0.99	26.1	2.3	45.2	3	6308	0.401408
FJW14_21_108	236.6	3.2	176	11	779	15	262	64	750	160	108	21	620	110	147	17	6.47	0.37	158	11	22.7	1.2	143.8	5.8	27.56	0.97	72.2	2.2	8.51	0.25	45.4	1.3	5.97	0.21	4.96	0.96	13.7	1	1740	0.225931
FJW14_21_109	518	10	180.4	4.4	743	18	27.01	0.91	141.5	3.5	27.15	0.66	133.4	3.5	70.6	1.5	14.65	0.4	104.6	2.8	23.02	0.47	148.7	3.1	24.66	0.5	60.5	1.3	8.02	0.25	46.6	1.5	5.85	0.17	0.628	0.092	35.4	2.9	329.06	0.242799
FJW14_21_110	346.4	5.8	170.9	2.6	211	7.4	100.6	4	218.9	8.6	27.7	1	133.9	3.5	32.9	1.5	9.81	0.5	43.2	1.4	5.78	0.25	36.7	1.2	7.58	0.28	19.91	0.82	2.36	0.14	13.13	0.84	2.25	0.13	4.83	0.47	7.45	0.34	481.1	0.809953
FJW14_21_111	262.8	6	159.8	3.7	924	20	672	16	1936	50	287.6	8	1367	31	328.4	7.1	37.29	0.96	261.4	5.9	31.06	0.66	167.2	3	30.68	0.71	78.4	1.4	10.46	0.22	62.2	1.4	9.74	0.23	61.5	1.8	12.93	0.86	4262.6	0.172944
FJW14_21_112	243.4	5	407.8	8.9	348	9.2	26.48	0.65	112.4	3.1	22.42	0.62	153.3	5	58.6	1.7	16.48	0.42	68.6	1.6	9.23	0.27	54.9	1.5	10.67	0.23	30.7	0.73	4.44	0.15	28.88	0.63	4.339	0.097	0.323	0.049	13.91	0.25	314.6	1.17184
FJW14_21_113	299.9	7.1	589	10	601	16	96.3	2.6	382	12	70.4	2	427	12	140.4	4.7	35.1	1	138.9	3.8	19.5	0.55	116.1	3.1	21.57	0.68	57.2	1.7	7.39	0.25	42.7	1.2	5.86	0.15	3.76	0.27	9.73	0.31	975.7	0.980033
FJW14_21_114	280.7	4.6	746	15	1009	19	110.6	3	468	12	90.1	2.1	587	12	211	5.2	56.1	1.1	224	3.4	32.34	0.63	196.6	3.7	37.05	0.6	100.1	1.6	12.76	0.29	73	1.9	10.09	0.17	11.06	0.73	20.05	0.5	1255.7	0.739346
FJW14_21_115	379.4	7.9	54.6	1.3	1807	52	731	21	2638	71	395	12	1842	46	383.9	9.9	45.1	1.1	345.7	8.2	48.9	1	296.8	8.3	59.2	1.9	171.3	4.9	23.24	0.59	144.6	4	20.58	0.39	48.9	2.4	44.1	1.2	5606	0.0302158
FJW14_21_116	650	15	70.3	2.1	707	18	54.7	1.7	353	13	80.4	2.5	527	15	297.8	7	8.07	0.32	310.6	6	42.81	0.89	191	4.4	25.33	0.56	51.5	1.1	5.28	0.16	24.83	0.8	2.929	0.097	0.225	0.042	3.52	0.16	1015.1	0.0994342
FJW14_21_117	440	11	483	13	922	21	205.6	7.1	666	20	104.8	2.7	576	17	171.1	4.2	33.77	0.71	186.1	4	25.98	0.72	159.1	3.7	31.23	0.8	84.2	2.2	10.89	0.34	65.3	2	10.63	0.21	4.53	0.21	10.4	0.21	1552.4	0.523861
FJW14_21_118	423.5	5.8	485	10	1025	38	224	8.2	718	26	113.9	3.9	638	25	185.4	7.3	37	1.3	207.7	7.1	28.3	1.1	172	6.7	35.2	1.2	93.8	3.3	12.17	0.48	74.9	2.6	11.4	0.38	5.21	0.43	12	0.58	1693.9	0.473171
FJW14_21_119	405.2	8.8	76.7	3.5	1912	53	130.4	2.8	602	15	110	2.7	645	20	318.2	8.5	8.83	0.37	426.5	7.9	72.3	1.6	439	13	72	1.2	166.1	3.9	17.57	0.4	78.5	2.2	8.35	0.22	1.35	0.12	2.634	0.06	1487.4	0.0401151
FJW14_21_120	911	24	256	7.8	1439	46	465	14	1377	48	196.4	6.7	958	30	284.8	8.1	6.53	0.21	304.7	9	46.5	1.3	286.7	9.8	54	1.7	136.4	4.3	16.18	0.45	84.5	2.5	10.57	0.31	3.75	0.22	21.19	0.55	2996.4	0.177901
FJW14_21_121	284.8	5	322.9	6.9	510	27	42.5	1.8	139.7	5.8	22.8	1.1	142.1	7	66.6	3.4	12.26	0.68	108.8	5.2	18	1	108.6	5.6	19.37	0.97	45.7	2.4	4.6	0.22	22.9	1.4	3.71	0.2	1.59	0.16	13.41	0.73	347.1	0.633137
FJW14_21_122	553	15	83.1	2.1	498	12	30.13	0.94	125.2	4.2	23.02	0.58	134	4.8	74.4	2.4	9.54	0.28	119.7	3.5	22.96	0.66	143.6	4.2	22.18	0.63	49.1	1.6	5.73	0.18	31.5	1	3.64	0.11	0.26	0.044	6.67	0.24	312.35	0.166867
FJW14_21_123	1536	40	201	7.3	1330	72	87.2	4	390	15	73.5	3	459	18	242	11	20.4	1	360	6.8	63.5	2.3	355	11	51.9	1.9	105.4	4.3	9.75	0.5	44.8	1.4	4.57	0.23	0.03	0.028	13.53	0.28	1009.7	0.151128
FJW14_21_124	305	5.1	134.1	3.4	237.6	6.4	234.3	5.5	1069	27	207	5.5	1201	29	395.5	8.7	12.8	0.4	327.6	6.9	34.26	0.8	108.2	2.4	8.45	0.18	9.58	0.33	0.564	0.037	2.21	0.16	0.238	0.014	0.88	0.13	45.24	0.78	2711.3	0.564394
FJW14_21_125	2525	49	214.3	5.2	1243	39	99	3	361	10	62	1.9	341.5	9.6	147.2	3.9	32.45	0.66	207.7	5.6	40.67	0.88	279.8	6.7	50.3	1.2	118.6	2.5	14.45	0.42	82.9	2.7	11.09	0.75	1.41	0.17	23.4	1.8	863.5	0.172405
FJW14_21_126	1759	38	72.8	1.9	1500	42	407	98	1230	250	187	33	940	140	316	29	7.32	0.43	319	17	54.8	2.4	342	11	57.6	1.7	140.6	3.5	17.08	0.43	96.2	2.8	11.16	0.27	22.6	3.8	41.7	4	2764	0.0485333
FJW14_21_127	1652	37	83.5	2	1305	35	108.1	2.8	403.4	8.9	72.6	1.7	397	11	197	5.1	7.26	0.22	271	5.5	51.1	1.2	316.7	7.3	49.6	1.1	117.2	2.6	14.84	0.36	86.8	2.1	10.01	0.25	1.82	0.12	11.15	0.22	981.1	0.0639847
FJW14_21_128	954	23	381	10	627	19	43.6	2.2	221.8	5.8	52.2	1.8	381	14	150.7	3.8	16.19	0.42	154.4	4.4	22.57	0.63	136.3	3.4	24.58	0.67	59.3	1.8	7.58	0.29	42.1	1.2	5.13	0.15	0.085	0.042	5.45	0.47	698.6	0.607656
FJW14_21_129	895	39	359	18	937	36	57.2	3.4	308	13	76.2	3	548	32	236	10	22.92	0.9	242.9	8.7	36.2	1.2	204.9	7.2	38.8	1.4	91.8	3	11.88	0.47	64.6	2.5	7.92	0.26	0.072	0.023	11.67	0.31	989.4	0.383138
FJW14_21_130	556	14	140.7	3.5	2034	51	137.3	3.3	548	14	97	2.7	532	11	196.9	4.9	16.31	0.48	226.4	5.6	50.7	1.1	384.2	8.8	76.8	1.9	205.7	4.9	27.3	0.62	162.2	4.3	19.61	0.42	0.624	0.064	16.58	0.38	1314.3	0.069174
FJW14_21_131	156.4	4.3	220.2	5.1	1505	37	12.16	0.42	74.5	2	20.01	0.7	167.5	4.9	104.5	3.3	37.35	0.86	193	4	34.69	0.67	263.6	6.1	55.4	1.3	159	3.7	20.57	0.57	121.1	3.6	16.29	0.32	0.49	0.062	12.57	0.32	274.17	0.146312
FJW14_21_132	380.1	9	2078	73	219.7	7.6	1011	29	2109	69	254.4	5.9	1092	37	179.2	5.9	35.48	0.86	121.4	3.4	12.51	0.31	59.1	1.9	8.18	0.31	17.04	0.7	1.71	0.12	8.16	0.44	0.946	0.05	18.79	0.91	5.61	0.14	4466.4	9.45835
FJW14_21_133	299.7	7.5	1253	34	180.2	6.1	763	25	1305	38	142.5	4	581	20	93.4	2.8	21.12	0.51	69.4	2.1	7.09	0.2	37.07	0.98	6.4	0.21	15.74	0.56	1.845	0.071	10.65	0.43	1.685	0.062	26.15	0.83	25.46	0.59	2791.5	6.95339
FJW14_21_134	343.3	8.2	3276	75	58.2	1.9	1312	36	1608	44	123.1	3.9	421	14	44.2	1.7	10.83	0.4	28.2	1.1	2.394	0.099	10.86	0.53	1.871	0.08	4.56	0.22	0.525	0.027	3.43	0.2	0.602	0.029	46.9	1.4	13.48	0.32	3464.1	56.2887
FJW14_21_135	426	11	66.9	1.9	3940	120	16.11	0.56	69.2	2	15.71	0.53	133.5	3.9	144.3	4	32.54	0.83	387	10	87.6	2.2	690	17	141.3	3.1	398.2	8.1	49.8	1	269.5	6.3	34.97	0.8	7.27	0.34	16.15	0.39	234.52	0.0169797
FJW14_21_136	637	16	66	1.7	3258	98	10.84	0.37	42.5	1.6	8.64	0.37	68.5	3	67	2.6	26.06	0.74	208.9	7.1	54.7	1.8	491	14	116.6	3.1	352	12	47.4	1	278	8.3	35.65	0.95	2.49	0.16	7.16	0.21	130.48	0.0202578
FJW14_21_137	580	68	162.7	5.6	749	34	380	18	1106	60	171.8	8.8	838	45	182.1	8.4	30.2	1.3	170.9	9.4	20.08	0.96	122.3	6.3	23.8	1.1	69.6	2.9	9	0.37	58.3	3	9.91	0.43	14.6	1.1	6.07	0.22	2495.8	0.217223
FJW14_21_138	921	27	239.1	8	1505	41	177.4	4.5	611	16	101.2	3.1	575	19	233.1	7.4	19.43	0.61	276.7	7.8	46.2	1.1	291.7	7.6	53	1.4	127.5	4.1	15.36	0.48	82.5	2.4	9.16	0.29	2.04	0.14	1.917	0.087	1464.6	0.15887
FJW14_21_139	3004	53	219.3	2.7	1479	25	172.5	3	612.6	9.9	99.1	2.3	556.9	9.3	233.9	4	8.68	0.27	296.6	4	52.8	0.86	330.5	4.6	55.6	1	132.1	2.4	15.32	0.24	82.2	1.5	9.39	0.21	1.14	0.12	8.12	0.23	1441.1	0.148276
FJW14_21_140	2341	52	209.6	5.3	1256	21	149.5	3.5	550	12	89.1	1.3	508	11	214.6	5	8.36	0.3	260.9	5.4	45.51	0.87	280.1	4.7	45.9	0.81	107.4	2.3	12.42	0.27	65.7	1.9	7.6	0.2	0.94	0.18	4.37	0.21	1296.6	0.166879
*SVM Class:	The source rocks of apatite can be divided into high-grade metamorphic (HM), low- and medium-grade metamorphic (LM), I-type granitoids and mafic igneous (IM), S-type granitic (S), alkaline-rich igneous (ALK) and ultramafic igneous (UM) rocks

## Sheet: Reference materials 1
Table S2 Trace elemantal compositions of detrital apatites
	55Mn	2SE	87Sr	2SE	89Y	2SE	139La	2SE	140Ce	2SE	141Pr	2SE	146Nd	2SE	147Sm	2SE	153Eu	2SE	157Gd	2SE	159Tb	2SE	163Dy	2SE	165Ho	2SE	166Er	2SE	169Tm	2SE	172Yb	2SE	175Lu	2SE	232Th	2SE	238U	2SE
	ppm	ppm	ppm	ppm	ppm	ppm	ppm	ppm	ppm	ppm	ppm	ppm	ppm	ppm	ppm	ppm	ppm	ppm	ppm	ppm	ppm	ppm	ppm	ppm	ppm	ppm	ppm	ppm	ppm	ppm	ppm	ppm	ppm	ppm	ppm	ppm	ppm	ppm
Glass NIST612
G_NIST612_1	38.5	1.1	79.9	2.4	38.6	1	36.91	0.97	38.8	1.1	37.75	0.95	37.9	1.5	38.1	1.6	36.3	1	37.9	1.3	37.05	0.81	36.94	0.87	38.82	0.91	38	1.1	38.77	0.89	40.6	1.1	37.68	0.81	37.09	0.95	37.81	0.72
G_NIST612_2	37.7	1	79.4	1.5	37.68	0.9	35.6	1	38.7	1	36.56	0.88	35.2	1.3	38.1	1.4	34.85	0.81	36.2	0.93	35.67	0.81	36.21	0.91	37.74	0.87	38.26	0.98	37.88	0.77	39.5	1.1	36.41	0.71	37.39	0.86	37.14	0.66
G_NIST612_3	37.72	0.97	76.5	1.8	38	1.1	34.58	0.98	38.21	0.93	37.8	1	35.1	1.5	36.3	1.3	34.59	0.83	36.3	1.1	35.8	0.7	35.17	0.99	37.54	0.76	38.36	0.98	37.87	0.72	38.36	0.87	36.84	0.75	37.86	0.78	37.21	0.59
G_NIST612_4	37.5	1.1	77.2	1.7	37.5	1	35.73	0.94	39.3	1.3	36.1	1.1	35.8	1.6	37.8	1.5	34.75	0.85	36.3	1.1	35.46	0.81	35.83	0.9	37.39	0.82	37.48	0.91	37.81	0.72	39.3	1.2	36.69	0.76	38.03	0.83	37.37	0.64
G_NIST612_5	38.56	0.98	77.4	2	37.7	1.1	35.7	0.88	37.5	1.2	37.28	0.94	36.7	1.6	37.7	1.4	34.59	0.79	36.1	1.1	35.36	0.9	36.15	0.9	37.8	0.83	37.62	0.94	37.07	0.85	38.4	1.1	36.27	0.73	37.51	0.83	37.13	0.71
G_NIST612_6	37.7	1.2	78.1	1.7	38.03	0.9	35.97	0.88	39.4	1.2	38.1	1.2	34.9	1.7	38.5	1.5	35.06	0.9	36.8	1.1	35.96	0.7	35.7	0.84	37.82	0.61	37.84	0.86	38.04	0.83	39.5	1.1	37.72	0.61	38.87	0.98	37.87	0.73
G_NIST612_7	39.15	0.91	78.6	1.6	38.5	1.1	35.87	0.94	39.1	1	37	1	36.1	1.4	39.2	1.2	34.81	0.77	37.2	1.1	36.44	0.83	35.6	1	38.51	0.77	39.3	1	38.77	0.83	40.1	1.2	36.95	0.84	37.7	1.1	37.64	0.8
G_NIST612_8	37.1	1.2	79.4	2	37.8	1.1	35.9	1	39.6	1.2	37.7	1.1	36.3	1.9	38.6	1.3	35.37	0.94	37.5	1	36.36	0.72	36.38	0.99	38.74	0.75	38.1	1.1	38.18	0.79	39.4	1.1	37.18	0.79	38.46	0.96	37.91	0.6
G_NIST612_9	38.3	1.1	77.6	1.7	37.67	0.77	34.61	0.91	38.7	1.1	37	1.2	36.4	1.5	38	1.2	35.21	0.75	37.1	1	35.59	0.65	36	1.1	37.97	0.95	37.76	0.95	37.74	0.88	39.1	1.1	36.74	0.65	37.37	0.88	37.05	0.55
G_NIST612_10	37	1.1	78.7	1.9	38.4	1.1	36.84	0.94	38.3	1.2	38	1.1	37.4	1.4	38.1	1.2	34.56	0.83	36.5	1.3	36.25	0.87	35.9	1	38.58	0.98	39.33	0.95	37.91	0.84	39.44	0.98	36.25	0.72	37.5	1	36.76	0.73
G_NIST612_11	38.3	1.1	78.1	2	38.8	1.2	34.9	1.2	37.84	0.88	36.3	1.1	35	1.6	37.4	1.5	35.3	1	36.3	1.1	36.05	0.92	35.7	1.1	37.8	1.1	37.25	0.97	37.94	0.86	39.3	1.2	36.48	0.84	37.1	1.3	37.37	0.72
G_NIST612_12	38.7	1.1	80.9	2.2	38.4	1.3	36	1.1	38.78	0.99	36.7	1.3	34.9	1.7	37.5	1.5	34.76	0.82	36.7	1.5	35.6	1.1	35.5	1.1	37.4	1	37.28	0.8	37.7	1	38.5	1.4	36.68	0.93	38.2	1.4	37.35	0.82
G_NIST612_13	37.5	1	79.1	1.6	37.3	1	35.43	0.86	38.8	1.2	37.27	0.82	34.5	1.4	39.3	1.3	34.64	0.77	36.5	1.1	35.64	0.77	36.1	1	37.25	0.62	37.01	0.95	38.32	0.84	38.49	0.91	36.53	0.65	36.27	0.92	37.04	0.58
G_NIST612_14	36.2	1.1	78.2	1.7	38.7	1	36.3	1.2	39.5	1.2	37.59	0.97	36.6	1.6	38.2	1.4	35.02	0.8	37.6	1.3	36.26	0.83	35.78	0.94	38.17	0.81	38.5	1	37.9	0.84	39.4	1.2	37.84	0.69	38.8	1.1	37.67	0.74
G_NIST612_15	38.6	1.1	77.2	1.7	37.6	1.1	35.1	1.2	38.2	1.2	36.57	0.84	35.2	1.6	37.5	1.5	34.94	0.92	36.9	1.3	35.92	0.8	35.28	0.99	38.3	1	37	1.1	38.14	0.91	39.1	1.2	36.78	0.9	37.8	1.1	37.32	0.49
G_NIST612_16	39.04	0.97	79.5	1.7	38.29	0.96	36.89	0.85	40.3	1.3	37.9	1	36.8	1.3	39	1.6	35.82	0.91	36.8	1.1	36.96	0.9	36.36	0.87	38.85	0.78	38.89	0.9	38.92	0.81	39.5	1.1	37.53	0.76	40.1	1.1	38.28	0.69
G_NIST612_17	37.9	1	78.6	1.5	37.2	1	36.38	0.88	38.29	0.89	36.86	0.91	34	1.7	38.9	1.2	34.8	0.8	35.74	0.99	35.67	0.65	35.78	0.79	37.83	0.64	37.47	0.83	37.77	0.66	38	1.1	36.7	0.72	37.59	0.98	37.22	0.61
G_NIST612_18	37.5	1.1	78.1	1.6	37.64	0.92	35.21	0.74	38.7	1.1	38.24	0.99	36.6	1.3	37.6	1.4	35.55	0.81	37.4	1.1	36.3	0.55	36.42	0.99	38.66	0.71	38.41	0.94	37.92	0.73	39.9	1.2	37.1	0.74	38.07	0.88	37.68	0.6
G_NIST612_19	37.52	0.97	77.9	1.4	38.2	0.92	35.66	0.88	38.43	0.79	36.33	0.7	37.6	1.4	38	1.5	34.82	0.66	36.3	1	35.59	0.61	35.86	0.91	37.76	0.75	37.29	0.79	37.69	0.45	39.34	0.83	36.33	0.52	37.28	0.92	36.67	0.47
G_NIST612_20	37.6	1.1	77.9	1.4	37.7	1	36.62	0.76	38.78	0.85	37.69	0.66	34.4	1.2	38.4	1.4	34.87	0.63	35.82	0.93	35.83	0.71	36.31	0.73	37.4	0.71	37.85	0.84	37.67	0.64	38.99	0.85	36.22	0.56	37.19	0.83	37.27	0.47
G_NIST612_21	38.8	1.1	80.1	1.7	38.49	0.97	35.38	0.93	38.19	0.88	36.92	0.91	34.3	1.3	36.5	1.3	35.5	0.72	36.7	1.2	36.35	0.63	36.07	0.86	38.09	0.65	37.67	0.96	37.98	0.66	38.56	0.87	37.16	0.69	37.75	0.87	37.04	0.52
G_NIST612_22	37.7	1	78.8	1.5	38.89	0.79	36.1	1	39.61	0.8	37.26	0.85	35.4	1.3	39	1.3	35.09	0.54	36.58	0.99	36.31	0.73	36.34	0.88	38	0.72	38.93	0.87	38.3	0.6	38.59	0.87	37.04	0.7	38.11	0.78	37.75	0.5
G_NIST612_23	39	0.96	78.4	1.6	37.74	0.79	34.9	1	38.6	0.88	36.62	0.8	34.6	1.3	39.1	1.4	34.65	0.62	37.02	0.89	35.96	0.61	36.03	0.92	37.72	0.73	37.45	0.85	37.38	0.71	39.2	1.1	37.12	0.59	37.8	0.7	37.43	0.56
G_NIST612_24	37.6	0.84	78.9	1.3	38.01	0.78	36	1	38.38	0.99	37.51	0.72	36.5	1.3	38.6	1.1	35.21	0.67	37.25	0.92	35.89	0.54	35.76	0.93	38.4	0.57	39.15	0.82	38.83	0.63	40	1.1	37.83	0.57	39.07	0.82	37.76	0.52
G_NIST612_25	39.2	1	79.8	1.5	37.9	0.95	35.99	0.75	38.97	0.94	37.22	0.76	37.6	1.2	38.4	1.2	35.5	0.64	37.24	0.86	36.58	0.66	36.83	0.9	38.4	0.7	38.82	0.55	38.06	0.65	39.6	1	37.55	0.54	38.48	0.87	37.78	0.53
G_NIST612_26	37.34	0.97	77	1.2	38.27	0.87	35.4	0.91	38.49	0.76	37.17	0.75	36.3	1.2	37.1	1.1	35.15	0.65	37.03	0.88	36.04	0.67	35.45	0.9	38.04	0.65	37.48	0.74	38.16	0.67	39.77	0.69	36.65	0.58	37.53	0.81	37.5	0.47
G_NIST612_27	38.51	0.95	78.8	1.6	38.03	0.85	35.83	0.82	39.06	0.96	37.69	0.79	35.7	1.3	37.8	1.4	34.84	0.64	35.98	0.98	36.31	0.67	36.01	0.82	37.55	0.64	37.13	0.97	38.09	0.68	39.1	0.87	36.52	0.58	36.74	0.87	37.11	0.58
G_NIST612_28	36.6	1.2	77	1.5	37.39	0.82	35.73	0.88	38.56	0.71	37.08	0.77	36.6	1.3	37.8	1.3	34.27	0.73	36.51	0.89	35.16	0.65	35.78	0.88	37.9	0.72	37.51	0.83	37.75	0.58	39.17	0.88	36.55	0.52	37.29	0.83	37.25	0.46
Apatite Durango
A_Dur_1	99.4	2.9	503	15	795	26	3600	120	5330	170	458	14	1622	45	235.6	6.2	19.69	0.62	186.3	4.9	23.23	0.66	134.1	3.5	26.07	0.64	71.1	2.4	8.72	0.23	47.3	1.8	5.28	0.14	238	6.2	12.5	0.26
A_Dur_2	97.6	3	501	13	792	23	3700	110	5180	140	461	17	1558	51	223.4	6.1	19.55	0.74	183.8	5.7	21.79	0.69	126.8	3.4	25.12	0.79	67.3	1.7	8.36	0.25	44.8	1.2	5.06	0.16	229.2	7.5	12.55	0.29
A_Dur_3	100	2.8	503	13	806	27	3800	130	5180	170	465	15	1615	57	223.9	6.7	19.32	0.67	189.6	5.7	22.94	0.75	131.5	4.4	26.9	0.74	71.2	2.3	8.83	0.3	48.5	1.6	5.44	0.15	238.9	8.4	12.78	0.25
A_Dur_4	100.3	2.9	491	16	766	25	3540	150	4840	180	445	14	1577	40	215.6	5.8	18.68	0.65	180.8	5.1	21.36	0.63	129.1	3.2	25.31	0.69	68.4	2	8.39	0.33	45.3	1.3	5.11	0.12	298	9.1	15.99	0.41
A_Dur_5	-110	790	1500	1500	1140	740	3700	1500	8100	8700	370	310	1130	790	220	150	24	12	10	280	21.7	9.4	75	22	31	19	80	37	6.5	2.3	140	160	12	11	171	55	33	30
A_Dur_6	98.3	2.5	519	18	789	28	3730	130	5200	190	465	16	1573	53	228.4	6.8	19.44	0.74	185.4	5.7	22.83	0.85	132.5	5.1	25.99	0.74	69.8	2.3	8.73	0.31	48.6	1.7	5.31	0.16	237.7	8	12.69	0.35
A_Dur_7	94.8	3.3	519	21	769	32	3630	130	5030	180	427	16	1545	56	214	9.3	17.99	0.52	178.1	6.1	22.07	0.75	127.9	4	25.34	0.9	66.7	2.5	8.55	0.32	44.5	1.7	5.04	0.17	237.5	9.7	13.25	0.37
A_Dur_8	99.3	2.7	502	17	749	31	3620	110	4980	190	447	18	1515	57	217.6	7.3	18.53	0.67	175.8	4.7	20.91	0.6	126.3	4.1	24.86	0.67	67	2.4	7.98	0.25	43.5	1.3	4.96	0.19	245.1	8.5	13.93	0.31
A_Dur_9	95	2.9	513	18	721	26	3790	140	4960	170	422	14	1391	35	201.7	6.7	17.21	0.44	163.1	3.8	20.43	0.5	122.3	4	23.51	0.67	64.1	1.9	8.05	0.25	43.2	1.4	4.88	0.14	230.4	6.8	12.85	0.27
A_Dur_10	101.2	3.5	516	18	765	27	3790	130	5380	200	465	17	1608	54	232.3	7	18.48	0.63	193.4	5.6	23.03	0.75	135.4	4.2	27.73	0.99	70.3	2.1	8.62	0.29	46.9	1.5	5.35	0.19	233.2	9.5	12.72	0.31
A_Dur_11	101.7	3.4	491	14	791	21	3760	110	5130	180	448	15	1547	45	212.9	5.2	17.95	0.61	181	4.6	21.94	0.51	131.6	3.1	26.29	0.74	71	1.9	8.99	0.3	46.7	1.4	5.12	0.17	251.9	7	14.28	0.26
A_Dur_12	93.5	2.8	487	16	726	25	3564	96	4710	170	412	14	1390	53	203.6	6	16.47	0.57	163	3.9	20.35	0.56	125.3	3.8	24.4	0.7	64.6	1.9	8.05	0.25	43.5	1.5	4.93	0.13	229.1	7.6	13.09	0.28
A_Dur_13	100.1	3.3	502	19	783	27	3740	160	4960	190	435	17	1447	41	214.4	8.3	17.8	0.6	179.3	5.9	22.17	0.84	130.1	4.8	25.76	0.76	70.5	2.5	8.61	0.33	44.5	1.4	5.01	0.18	260	9.1	14.26	0.42
A_Dur_14	99.6	2.5	494	14	762	22	3650	130	5380	220	451	16	1597	50	222	6	19.08	0.54	179.9	4.5	22.28	0.65	126.6	3.5	25.55	0.79	68.8	2.1	8.43	0.26	45.8	1.4	5.13	0.16	235.4	8.4	12.84	0.29
A_Dur_15	100.2	3.6	498	12	770	22	3810	120	5150	170	459	11	1593	45	221.6	7.4	18.87	0.65	183.8	5	22.42	0.67	132.1	4.2	25.65	0.75	69.6	2	8.66	0.28	45.5	1.2	5.26	0.19	238	6.7	12.55	0.28
A_Dur_16	103.5	2.5	505	15	795	30	3680	140	5270	140	468	16	1635	48	228.1	5.9	19.66	0.72	191.9	5.3	22.7	0.53	135	3.3	26.05	0.64	70.2	2.3	8.73	0.32	47.4	1.8	5.37	0.15	242.2	6.9	12.98	0.28
A_Dur_17	102.5	5.2	516	26	761	41	3560	240	5190	380	453	23	1520	87	217	8.8	18.59	0.9	179	6.9	22.3	1	126.4	4.9	24.6	1.2	67.1	3.5	8.6	0.41	44.2	1.8	4.83	0.22	230	10	13.04	0.44
A_Dur_18	98.6	2.7	498	16	755	17	3706	78	4750	130	403.2	9.3	1399	37	199.7	5.5	17.92	0.41	162.4	3.7	21.08	0.63	123.5	3.4	24.42	0.58	67.5	1.5	8.61	0.26	46.3	1.3	5.3	0.17	245	6.4	12.2	0.34
A_Dur_19	94.7	2.3	496	10	767	21	3650	100	4850	120	412.9	7.4	1428	40	209.2	6.1	16.85	0.45	165.2	3.2	21.13	0.53	125.6	2.8	24.37	0.62	65.1	1.5	8.23	0.2	44.34	0.91	5.16	0.11	234.1	6.1	13.2	0.2
A_Dur_20	96.6	2.1	501.5	9.5	746	22	3701	82	4830	110	413.7	8.4	1390	34	197.2	5.2	18.28	0.54	161.5	3.6	20.83	0.44	123.5	3	24.17	0.54	66.4	1.5	8.36	0.2	46.5	1	5.19	0.12	241.9	5.8	12.3	0.18
A_Dur_21	97.8	3.4	500.1	8.3	763	15	3514	63	4920	110	434	12	1493	38	215.1	6.3	18.64	0.59	170.6	3.9	20.98	0.61	124.9	3.3	24.02	0.78	65	1.5	8	0.33	42.3	1.8	5.05	0.17	208.1	6.5	11.17	0.35
A_Dur_22	93.2	2.1	482	15	754	20	3510	95	4840	140	430	11	1500	48	217.6	5.1	17.83	0.48	173	4.7	21.71	0.53	122.4	3	24.42	0.58	67	1.7	8.34	0.21	43.7	1.4	4.95	0.13	232.1	7	12.7	0.26
A_Dur_23	96.9	2.8	511	12	757	19	3710	100	5120	110	442	11	1556	41	221.4	5.3	19.04	0.49	179.2	4.3	22.47	0.56	131.5	3.3	25.36	0.78	68.9	1.6	8.66	0.27	45.3	1.2	5.15	0.16	240.9	7.7	12.89	0.25
A_Dur_24	98.2	2.3	514	15	806	23	3739	97	5150	130	466	13	1574	44	230	6.5	19.11	0.49	181.2	4.9	23.08	0.68	134.3	2.9	26.17	0.65	71.1	1.8	8.79	0.24	47	1.2	5.4	0.11	237.2	6.6	13.06	0.24
A_Dur_25	99.4	2.8	498	13	774	16	3623	83	5120	130	458	12	1558	34	230	5.3	19.07	0.52	178.7	4.8	22.1	0.51	131.2	2.7	25.55	0.52	69.3	1.6	8.56	0.2	46.1	1.4	5.21	0.15	229.6	7.4	12.85	0.25
A_Dur_26	92.1	2	497	14	747	15	3491	70	4960	110	427.1	8.2	1472	38	216.9	5.3	17.8	0.5	174.2	4.2	21.64	0.52	128.7	3	24.85	0.55	66.8	1.7	8.37	0.19	43.2	1.1	4.98	0.12	235.2	4.7	13.13	0.21
A_Dur_27	98.9	2.6	495	15	755	18	3573	96	4880	150	439	12	1497	40	220.7	5.7	18.13	0.48	168.9	3.2	21.34	0.62	128.4	3.2	24.6	0.52	66.5	2	8.04	0.23	43.8	1.3	4.87	0.15	226.7	8.5	12.34	0.25
A_Dur_28	98.4	2.8	516	18	792	23	3650	130	5330	200	449	16	1572	50	228.3	6.8	18.57	0.7	180	5.5	22.41	0.65	132.2	4.7	25.99	0.74	69	1.7	8.34	0.25	45.8	1.2	5.19	0.16	235.3	8.1	12.75	0.32
Apatite McClure Mountain
A_McClure_1	85.5	3.1	3296	90	158.7	5.6	1454	45	2375	81	223	10	734	25	80.1	2.8	38.6	1.2	53	1.8	5.52	0.17	30.01	0.93	5.44	0.18	14.76	0.57	1.868	0.093	11.35	0.5	1.552	0.056	36.7	1.1	14.27	0.39
A_McClure_2	127.3	9.1	3780	130	194.8	7.1	1707	63	2870	120	270	11	963	32	107.8	3.5	40.5	1.5	74.9	2.4	7.7	0.33	40.3	1.6	7.1	0.25	18.66	0.64	2.188	0.083	13.19	0.53	1.758	0.079	59.1	2.3	17.52	0.47
A_McClure_3	74.2	1.7	3760	110	194.3	7.1	1605	54	2551	88	242.5	8.9	801	25	89.2	3.1	36.1	1.2	62.4	1.7	6.96	0.21	35.4	1.1	6.81	0.2	17.95	0.65	2.26	0.1	14.52	0.56	2.17	0.099	54.3	1.9	17.48	0.5
A_McClure_4	60.3	1.9	4230	130	186.6	7.4	1103	45	1877	61	174.3	4.7	645	22	82.6	2.5	24.04	0.68	57.5	1.7	6.44	0.23	34.1	1.1	6.49	0.21	17.1	0.57	2.141	0.093	13.07	0.53	1.937	0.066	17.15	0.6	5.65	0.11
A_McClure_5	77.1	2.2	3350	100	213.7	5.2	1750	48	2801	74	260.1	5.7	887	27	104.3	2.8	43.9	1.1	65.6	1.7	7.24	0.19	38.8	1	7.08	0.17	18.98	0.57	2.49	0.1	15.17	0.5	2.008	0.071	54.7	1.3	20.07	0.38
A_McClure_6	157.4	4.4	4250	130	277.9	6.9	1838	61	3230	100	328	10	1201	51	160.9	5.5	44.3	1.5	102.9	3.3	11.26	0.35	58.8	2	10.64	0.34	26.38	0.84	3.22	0.13	17.41	0.69	2.293	0.082	35.3	1.7	13.71	0.39
A_McClure_7	90.6	3.8	3620	120	202.7	8	1773	68	2459	86	215.2	6.8	674	27	78.2	3	31.5	1.1	50.6	2.3	5.53	0.25	31.3	1.2	6.29	0.26	18.98	0.88	2.74	0.13	19.42	0.77	3.12	0.11	58	2.4	17.11	0.6
A_McClure_8	93.4	3.1	3640	120	286	17	2200	97	3470	180	325	16	1157	66	139.4	7	63.4	2.7	96.7	4.3	9.97	0.52	57.6	3	10.44	0.55	28.3	1.3	3.45	0.18	22.5	1.5	3.46	0.2	107.8	8.3	35.6	2.1
A_McClure_9	139	4.8	3790	110	173.5	7.7	1498	64	2440	100	236	10	826	34	100.4	4.2	35.2	1.2	68.4	2.6	7.13	0.26	37.2	1.4	6.56	0.23	16.41	0.58	1.926	0.074	10.75	0.48	1.456	0.06	33	1.6	12.7	0.35
A_McClure_10	138.4	4.7	3800	120	302	11	2290	110	3930	180	375	15	1339	57	166	6.1	56.6	1.7	113	4.3	12.08	0.41	65.7	1.8	11.67	0.44	29.56	0.85	3.59	0.13	19.39	0.62	2.67	0.11	43.6	1.8	18.06	0.51
A_McClure_11	78.5	2.6	4010	140	136.5	6.2	1515	61	2257	82	210.2	9	726	29	82.9	2.7	30.8	1	52.1	1.8	5.55	0.22	26.81	0.87	4.62	0.22	12.55	0.57	1.438	0.078	7.54	0.41	1.067	0.04	47.5	1.8	12.38	0.35
A_McClure_12	91.1	4.5	3589	51	227.3	5.9	1669	40	2761	57	255.8	5.1	905	25	106	3.1	42.3	1.2	70.7	2.2	7.64	0.2	40.4	1.2	7.7	0.3	19.89	0.57	2.69	0.14	15.86	0.79	2.15	0.15	51.2	3.1	17.1	1.3
A_McClure_13	103.8	3	4280	150	342	12	1802	70	3208	99	338	12	1259	44	173.7	5.5	44.6	1.2	118.6	3.9	13.1	0.45	71.5	2.4	12.81	0.4	30.85	0.98	3.92	0.16	21.01	0.72	2.661	0.098	41.3	1.3	14.44	0.35
A_McClure_14	88.4	3.1	3970	110	242.3	9.2	1719	65	2750	110	260.9	9.3	943	31	109.9	4.8	37.6	1.1	77.5	2.9	8.52	0.32	45.6	1.6	8.27	0.31	22.37	0.79	2.97	0.12	18.26	0.89	2.616	0.098	70.4	3.6	20.48	0.84
A_McClure_15	80.3	2.4	3530	110	106.5	3.3	1639	48	2085	60	160.8	5.5	479	17	45.4	1.7	29.96	0.94	29.9	1.1	3.1	0.11	16.03	0.7	3.3	0.12	9.01	0.33	1.301	0.066	8.94	0.42	1.441	0.062	72.1	2.6	17.22	0.45
A_McClure_16	85	2.9	3445	83	232	10	1922	61	3070	110	284.8	9.7	988	37	118.9	4.5	49.7	2	76.7	2.7	8.49	0.4	43.9	1.7	8.03	0.3	21.3	1	2.7	0.13	15.59	0.79	2.18	0.1	71.2	6.2	20.8	1.3
A_McClure_17	90.3	3.1	3430	150	121.5	3.2	1699	67	2420	140	199	11	600	21	58.5	2.3	35.2	1.2	37	1.7	3.89	0.16	20.73	0.79	3.92	0.18	11.01	0.5	1.543	0.064	9.28	0.48	1.423	0.076	61.4	2	21.75	0.8
A_McClure_18	110.1	2.8	3660	88	179.5	4.2	1325	40	2204	47	214.8	5	782	25	98.2	2.8	30.42	0.79	64.8	1.9	6.9	0.21	36.82	0.92	6.6	0.17	17.21	0.38	2.165	0.084	11.75	0.49	1.606	0.056	15.55	0.5	6.56	0.13
A_McClure_19	79.4	1.9	4022	91	179.5	5.8	1628	37	2597	70	238.7	6.4	810	25	91.1	2.5	38.86	0.89	60.3	1.5	6.47	0.19	34.82	0.88	6.14	0.19	16.27	0.4	2.089	0.084	12.36	0.45	1.637	0.066	44.8	1.6	15.64	0.31
A_McClure_20	128.7	4.1	3862	81	210.3	7.2	1717	48	2770	100	263	10	902	35	105	4.7	39	1.5	72.3	2.8	7.67	0.32	40.7	1.8	7.38	0.34	19.11	0.83	2.392	0.092	14.56	0.61	1.959	0.073	55.9	2	15.63	0.45
A_McClure_21	102.8	2.5	4151	95	278.8	9.9	1916	76	3290	130	331	13	1160	57	145.5	6.2	45.6	1.8	99.3	3.6	11.02	0.43	59.6	2.5	10.36	0.45	26.1	1.1	3.31	0.13	18.6	1	2.44	0.13	70.2	3.3	22.6	1
A_McClure_22	86.3	2	3970	110	187.2	5.1	1680	40	2419	51	213.4	4.9	731	20	85	2.6	27.91	0.73	56.8	1.8	6.07	0.17	32.4	1	6.23	0.19	17.08	0.43	2.372	0.08	15.17	0.48	2.441	0.095	57	1.7	18.22	0.45
A_McClure_23	78.3	2	3477	97	173.2	4	1355	24	2201	53	208	5.3	708	17	81.7	2.2	31.63	0.79	56	1.3	6.18	0.13	33.29	0.87	6.23	0.21	16.53	0.51	2.079	0.08	12.45	0.52	1.8	0.057	29.32	0.9	11.22	0.26
A_McClure_24	84.2	1.9	3616	46	119.3	9.2	1189	17	1710	42	150.8	5.4	526	24	60.2	4	19.22	0.62	40.2	2.9	4.23	0.34	21.5	1.7	4.1	0.33	9.95	0.72	1.28	0.13	7.97	0.69	1.36	0.1	33.43	0.82	9.21	0.22
A_McClure_25	90.2	3	3759	92	162.8	4.9	1156	29	1939	48	179.4	4.4	661	18	83.4	2.6	25.74	0.79	56.3	1.6	6.23	0.19	32.53	0.86	6	0.18	15.51	0.4	1.925	0.086	11.32	0.35	1.65	0.051	13.1	0.43	4.952	0.098
A_McClure_26	105.3	2.3	3930	100	262.6	8.8	1676	43	2925	88	288.8	6.1	1095	27	140.6	4.3	40.96	0.91	94.9	2.6	10.5	0.34	55.6	1.6	10.01	0.22	24.82	0.75	3.15	0.11	17.63	0.49	2.214	0.075	24.81	0.98	10.16	0.22
A_McClure_27	84.5	2.2	3710	110	154.3	4.6	1715	42	2437	62	213.9	7.4	701	18	77.9	1.9	31.2	0.78	52.3	1.4	5.53	0.16	29.16	0.86	5.4	0.13	14.2	0.48	1.827	0.078	11.31	0.37	1.744	0.06	61.2	2	20.18	0.39
A_McClure_28	85.1	2.1	3762	97	428	16	2620	110	4600	180	440	15	1621	51	214.6	7.8	58.9	1.9	142.4	4.9	15.47	0.51	85	2.9	15.75	0.49	40.3	1.2	5.15	0.23	30.4	1.1	4.19	0.14	133.5	5.3	34.7	1.2

## Sheet: Reference materials 2
Table S2 Trace elemantal compositions of detrital apatites
	55Mn	2SE	87Sr	2SE	89Y	2SE	139La	2SE	140Ce	2SE	141Pr	2SE	146Nd	2SE	147Sm	2SE	153Eu	2SE	157Gd	2SE	159Tb	2SE	163Dy	2SE	165Ho	2SE	166Er	2SE	169Tm	2SE	172Yb	2SE	175Lu	2SE	232Th	2SE	238U	2SE
	ppm	ppm	ppm	ppm	ppm	ppm	ppm	ppm	ppm	ppm	ppm	ppm	ppm	ppm	ppm	ppm	ppm	ppm	ppm	ppm	ppm	ppm	ppm	ppm	ppm	ppm	ppm	ppm	ppm	ppm	ppm	ppm	ppm	ppm	ppm	ppm	ppm	ppm
Glass NIST612
G_NIST612_1	39.5	1.1	76.9	1.8	37.9	1.2	36	1.1	38.5	1	37.5	1	34.8	1.4	37.5	1.4	34.34	0.69	36.7	1.2	35.9	0.95	35	1.1	38.13	0.98	37.2	0.95	37.69	0.93	39.46	0.93	36.58	0.81	36.8	1	37.26	0.61
G_NIST612_2	38.9	1.3	78.6	2.1	37.44	0.94	35.8	1.1	39.2	1.2	37.46	0.9	35.3	1.5	38.6	1.1	34.6	0.74	36	1.1	35.57	0.97	36.71	0.95	37.3	0.88	38.18	0.99	37.3	0.83	39	1	36.21	0.71	37.3	1	37.23	0.62
G_NIST612_3	36.9	1	79.3	2.3	38.2	1.1	35.5	1.2	38.6	1.3	36.45	0.9	37.8	1.1	36.9	1.5	35.84	0.82	37.6	1.2	35.71	0.71	35.67	0.84	37.65	0.86	38	1	38.26	0.7	39.19	0.97	36.93	0.72	37.9	1	37.72	0.65
G_NIST612_4	37.7	1.3	77.1	1.8	37.6	1.3	35.5	1.1	38.71	0.99	37.3	1	35.7	1.5	39	1.6	34.31	0.96	37.1	1.1	35.52	0.88	35.4	1.1	37.92	0.94	38.4	1.1	37.96	0.86	38.3	1.2	37.07	0.73	37.7	1.1	36.76	0.62
G_NIST612_5	38.1	1.3	78.8	2	37.8	1.2	35.7	1.1	38.7	1.1	36.9	1.1	35.6	1.5	37.7	1	35.9	0.88	36.6	1.3	36.47	0.86	36.2	1.2	38.67	0.83	37.75	0.99	38.4	1.1	39.3	1.1	36.92	0.73	38.3	1.2	37.35	0.61
G_NIST612_6	37.5	1.1	80.8	2.5	38.5	1.2	35.8	1.2	38.77	0.94	37.3	1	36.3	1.4	38	1.1	35.54	0.88	37.5	1.1	35.75	0.78	35.7	0.98	37.5	0.87	38.4	1.1	38.36	0.9	39.05	0.97	37.11	0.92	37.9	1.2	37.9	0.63
G_NIST612_7	38	1	79.5	1.8	38.2	1.1	36.6	1.1	39	1.2	37.6	0.93	37.2	1.8	38.3	1.5	35.11	0.81	37.34	0.82	37.02	0.79	35.9	0.9	39.05	0.88	38.6	1.1	38.22	0.89	39.3	1.1	37.66	0.83	39.3	1.1	37.82	0.71
G_NIST612_8	38.4	1.1	77.2	1.8	37.56	0.98	35.32	0.93	38	1	36.57	0.93	34.2	1.5	39.2	1.6	34.36	0.94	35.8	1.1	35.97	0.78	36.4	1.2	38	0.84	37.61	0.86	38.12	0.8	39.4	1	36.85	0.83	37.5	1.1	37.34	0.61
G_NIST612_9	38.5	1.2	78.3	1.8	38.6	1.1	35.3	0.88	40	1.1	37.8	1.1	34.5	1.4	38.7	1.4	35.2	0.82	36.46	0.99	36.78	0.76	36.81	0.9	38.25	0.85	38.04	0.99	37.79	0.97	39.2	1.1	37.14	0.77	37.74	0.99	37.39	0.63
G_NIST612_10	38.17	0.87	79	1.7	37.9	1.2	36.4	1	38.6	1.1	37.3	0.99	35.1	1.5	38.1	1.6	35.6	1	35.58	0.96	36.18	0.66	36	1.2	38.2	0.89	38	1.1	37.85	0.8	39.4	0.91	37.42	0.67	38.35	0.98	37.28	0.66
G_NIST612_11	36.2	1.3	78.9	2.2	38.4	1.4	36	1.4	38.24	0.93	37.3	1.1	36.7	1.6	38.4	1.2	34.92	0.79	36.2	1.3	35.83	0.96	36.4	1.2	37.95	0.96	38.25	0.96	37.75	0.97	40.2	1.1	36.9	0.75	37.6	1.1	37.29	0.66
G_NIST612_12	38.3	1.1	79.3	2.6	39.5	1.1	35.9	1.1	39.6	1	37.1	1	36.2	1.5	38.4	1.6	35.6	1	37.1	1.1	35.97	0.88	36.7	1	37.96	0.95	38.6	1.1	38.45	0.95	39.1	1.3	37.17	0.77	37.8	1.2	37.99	0.75
G_NIST612_13	37.7	1.2	79.4	2.2	37.6	0.94	36	1.2	37.6	1.3	37.7	1.1	35.5	1.7	37.3	1.2	35.29	0.76	36.36	0.97	35.4	0.85	36.17	0.98	38.1	0.79	37	1.1	37.87	0.85	39.66	0.9	37.06	0.84	37.4	1.1	37.37	0.79
G_NIST612_14	36.8	1.2	78.1	2.4	38.3	1.3	36	1.2	38.1	1.3	37.5	1	36.7	1.7	38.3	1.3	35.2	1	37	1.3	35.86	0.81	35.6	1	37.74	0.94	37.8	1.2	39	1.1	39.4	1.2	36.36	0.93	37.7	1.2	37.34	0.84
G_NIST612_15	38.8	1.4	77.5	2.1	38.4	1	35.7	1.2	38.6	1	36.56	0.98	35.9	1.5	36.3	1.4	34.3	0.77	36.2	1.2	36.24	0.64	36.2	1	37.53	0.85	38.63	0.94	37.91	0.76	38.1	1.1	36.91	0.73	38.3	1.1	37.35	0.67
G_NIST612_16	38	1.1	79.1	1.9	38.46	0.97	36.6	1.3	38.29	0.91	37.6	1	36.1	1.5	39.3	1.7	34.7	0.73	36.9	1.1	35.81	0.72	35.1	1	38.04	0.89	38.1	1.1	37.9	0.93	38.8	1.3	36.15	0.8	38	1	36.77	0.64
G_NIST612_17	38.4	1.1	78.5	2.3	37.2	1.1	35.98	0.99	38.9	1.2	36.9	0.9	36.6	1.6	39.3	1.4	35.14	0.87	36.7	1.1	36.24	0.79	35.9	1.2	38.67	0.69	38.43	0.96	38.25	0.94	39.1	1.3	37.05	0.76	37.2	1	37.68	0.67
G_NIST612_18	37.5	1.2	77.8	1.6	37.2	1.1	36.07	0.89	38.4	1.2	37.5	1.2	35.7	1.8	38.1	1.4	34.94	0.89	36.7	1.4	35.02	0.84	36.8	1	37.61	0.92	38.38	0.91	38.26	0.89	39.3	1	36.46	0.68	38.03	0.99	37.19	0.57
G_NIST612_19	38.7	1.4	77.8	1.8	37.2	1.3	36.3	1.1	39.1	1.4	37.4	1.2	34.7	1.6	38.7	1.7	35.27	0.93	37.1	1.2	36.5	1	36.4	1.2	38.1	0.97	38.5	1	38.43	0.96	39.1	1.2	37.35	0.89	37.6	1.1	37.8	0.82
G_NIST612_20	38.2	1.3	79.5	2	37.7	1.2	35.8	1	38.7	1.4	37	1.1	36.5	1.6	36.3	1.3	34.86	0.9	36.8	1.2	35.92	0.59	35.81	0.84	36.8	0.93	37.12	0.85	37.1	0.69	38.9	1.1	37.01	0.77	38.4	1.1	37.56	0.69
G_NIST612_21	39.2	1.5	78.2	1.9	38.8	1.3	35.03	0.95	39.35	0.95	37.4	1	35.7	1.6	39.4	1.4	34.81	0.88	37.1	1.2	35.55	0.8	36.15	0.98	37.94	0.88	37.4	0.98	38.05	0.79	39.4	1	36.82	0.85	37	1.1	37.22	0.63
G_NIST612_22	37.6	1.4	77.7	2.2	37.9	1	35.5	1	38.1	1.6	36.98	0.95	36.1	1.5	37.9	1.5	34.98	0.89	36.4	1.1	36.3	0.64	35.24	0.98	38.3	1	38.1	1.1	38.09	0.68	39.1	1	36.75	0.76	37.56	0.97	37.29	0.69
Apatite Durango
A_Dur_1	97.9	3	514	15	786	31	3830	130	5400	230	455	17	1567	52	223	6.4	19.16	0.67	185.7	6	22.57	0.66	133.5	4.1	26.18	0.79	70.9	2.2	8.74	0.31	46.7	1.5	5.24	0.17	229.8	8.7	13.06	0.31
A_Dur_2	94.7	3.4	509	15	779	35	3740	140	4980	150	431	15	1448	52	193	6.2	18.12	0.58	171.6	4.7	21.65	0.6	127.6	4	25.75	0.65	69.3	1.7	8.8	0.32	47.6	1.5	5.55	0.17	249.8	7.2	13.26	0.31
A_Dur_3	101.5	3.2	514	16	792	33	3840	140	5290	220	462	17	1600	65	223.6	7.9	19.66	0.64	185.7	6.4	22.87	0.88	131.9	4.2	27.1	1	70.1	2.4	8.87	0.23	46.4	1.6	5.26	0.22	230.9	8.5	13.03	0.32
A_Dur_4	101.8	1.9	486.7	8.5	754	19	3541	51	4980	130	442	10	1529	32	214.3	4.8	18.19	0.44	178.2	3.8	21.92	0.52	125.2	2.2	25.69	0.62	68	1.6	8.48	0.24	46.1	1.2	5.26	0.13	287.3	6.2	15.89	0.26
A_Dur_5	99.5	3.7	496	19	789	32	3680	140	5280	180	455	19	1543	61	216.7	6	18.49	0.79	178.2	5	21.82	0.86	128.6	3.1	24.96	0.75	68.1	2.3	8.58	0.3	46.1	1.8	5.04	0.14	237.6	9.8	12.64	0.31
A_Dur_6	99	3.6	523	17	790	29	3680	130	5260	180	449	15	1605	61	224.2	7.4	19.48	0.55	180.7	5.9	22.51	0.65	132.2	3.7	25.97	0.75	71.1	2.1	9.07	0.32	45.9	1.1	5.23	0.15	231.2	9	12.59	0.26
A_Dur_7	101.4	2.9	500	12	770	23	3750	130	5130	180	423.7	9.3	1481	40	213.7	6.4	17.34	0.55	175.8	5.6	22.48	0.54	129.3	3.1	25.83	0.73	67.9	1.7	8.35	0.26	44.5	1.3	5.01	0.17	236.3	6.4	13.45	0.3
A_Dur_8	105.4	2.6	510	14	771	22	3740	130	5070	150	441	15	1549	58	219.1	5.8	19.15	0.5	181.2	3.5	21.6	0.6	129.8	3.6	26.11	0.7	69.9	2.1	8.39	0.24	46	1.3	5.2	0.14	270.3	8.8	15.39	0.31
A_Dur_9	100.8	4.1	499	16	763	28	3910	190	5200	200	441	17	1475	61	208.5	8.5	17.83	0.61	176.8	5.8	22.29	0.79	130	4.4	26.5	1.1	70.2	2.1	8.79	0.26	47.8	2.1	5.47	0.2	244.9	9.5	13.21	0.36
A_Dur_10	97.1	3.4	505	16	800	29	3670	130	5110	210	438	15	1555	57	226.3	7.2	18.09	0.61	184.4	6	22.14	0.86	135.3	4.2	25.5	0.86	68.7	2.7	8.67	0.33	45.3	1.8	5.12	0.21	232.1	5.7	12.48	0.27
A_Dur_11	103.3	3.3	530	16	844	30	3920	110	5300	190	445	15	1585	48	217.3	7.3	17.85	0.65	183.6	4.7	22.47	0.68	139.5	4.3	26.3	0.79	71.4	1.9	8.97	0.31	47.7	1.7	5.41	0.16	261.2	8.4	14.69	0.39
A_Dur_12	100.2	3	516	14	792	21	3830	85	5190	140	437	13	1480	51	217.9	6.6	17.46	0.49	180.3	3.7	22.06	0.54	133.9	3.8	25.91	0.78	69.5	2.2	8.63	0.23	46.1	1.4	5.04	0.16	254.5	6.8	13.72	0.27
A_Dur_13	102.2	2.9	526	22	788	29	3810	130	5470	210	441	17	1572	50	229.7	8.3	18.83	0.55	185.3	6.6	22.63	0.69	135.3	4.2	26.26	0.88	71.2	2.3	8.55	0.26	46.1	1.8	5.35	0.18	240.1	8.5	13.34	0.29
A_Dur_14	103.6	4	522	18	785	29	3810	130	5240	230	455	15	1556	50	227.6	6.3	19.19	0.66	181.9	6	22.25	0.64	130.4	4.4	25.63	0.69	68.9	1.9	8.58	0.27	44.5	1.3	5.16	0.16	236.3	8.2	12.93	0.31
A_Dur_15	101.9	3.2	501	16	777	23	3670	110	5060	140	427	12	1444	49	211.8	6.9	17.69	0.66	170.7	4.3	21.28	0.65	129.3	3.9	24.41	0.64	66.9	1.8	8.32	0.3	44.1	1.4	4.97	0.2	228	7.3	13.16	0.28
A_Dur_16	100.8	3.7	495	15	790	26	3640	140	5110	180	432	18	1513	50	219	6.9	18.19	0.54	180	5.2	22.02	0.66	130.9	4	25.22	0.85	68.4	1.9	8.43	0.28	44.6	1.5	5.13	0.18	232	9.2	12.47	0.29
A_Dur_17	102.4	2.5	498	12	789	15	3712	99	5150	160	447	12	1531	41	224.4	6	18.46	0.45	179.6	5.1	22.12	0.51	131.4	3.7	24.88	0.66	67.6	2	8.27	0.25	45	1.1	5.14	0.15	231.2	5.9	12.6	0.27
A_Dur_18	104.1	3.2	490	16	732	25	3700	140	5210	160	449	15	1564	58	214.8	8	18.79	0.64	174.8	4.6	22.13	0.74	125.3	3.6	24.9	0.8	64.6	2.1	8.02	0.33	44.6	1.5	5.13	0.16	271.5	8.3	15.37	0.39
A_Dur_19	106.8	3.2	514	17	799	23	3910	140	5300	190	450	15	1544	45	222.3	7.3	18.36	0.57	185.2	4.4	22.76	0.59	136	3.7	25.32	0.69	71	1.7	8.87	0.29	46.4	1	5.34	0.15	257.4	9.3	13.45	0.36
A_Dur_20	99.2	2.7	499	14	761	18	3744	84	5020	130	407	11	1408	35	201.1	5.2	18.38	0.58	164.2	4	20.72	0.51	124.8	3.2	24.58	0.47	67.7	1.8	8.33	0.24	47.1	1.1	5.43	0.14	245.7	6.3	12.47	0.25
A_Dur_21	98.8	3.5	501	21	777	28	3730	140	5100	190	438	17	1510	58	219	6.1	17.91	0.69	174.1	5.3	21.8	0.78	129.2	4.1	24.17	0.89	66.9	2.2	8.21	0.33	44	1.4	5.02	0.14	231.7	7.6	12.33	0.32
A_Dur_22	100.7	2.9	485	15	808	29	3840	130	5180	180	441	20	1552	57	225.9	7.8	18	0.66	176.8	6.1	22.23	0.75	130.7	3.6	25.88	0.86	69.4	2.1	8.48	0.28	44.6	1.7	5.02	0.17	226.8	7.6	12.66	0.32
Apatite McClure Mountain
A_McClure_1	134.5	3.8	5070	150	304.1	9.2	1930	71	3460	120	347	12	1241	51	155.6	5.5	46.3	1.5	106.4	3.5	11.81	0.34	64.5	1.9	11.47	0.32	28.77	0.85	3.62	0.13	19.57	0.73	2.319	0.076	32.2	1.4	12.79	0.36
A_McClure_2	61.4	1.3	3200	120	243.9	7.4	2111	83	3250	120	282.3	8.9	902	28	101.5	3.2	46.5	1.6	70.8	1.9	7.92	0.29	42.4	1.2	8.21	0.26	22.82	0.74	3.25	0.15	19.66	0.8	2.605	0.091	66.2	2.5	24.48	0.55
A_McClure_3	94.8	4.3	4880	170	194	7	1687	68	2540	120	226.7	6.7	814	27	92.8	3	33.6	1.2	63.6	2.1	7	0.24	37.2	1.3	6.85	0.29	17.61	0.76	2.22	0.11	13.35	0.5	1.939	0.072	60.2	4.6	18.69	0.8
A_McClure_4	86.7	3.4	3700	140	167.8	7.8	1759	77	2700	120	233	12	782	35	87.2	3.9	33.1	1.2	58.8	2.8	6.2	0.24	32.1	1.3	6	0.22	14.96	0.71	1.943	0.087	12.75	0.58	1.898	0.08	69.7	3.8	22.52	0.79
A_McClure_5	97.9	2.1	4770	140	227.7	5.8	1593	50	2666	89	252.7	7.3	928	31	121.1	3.1	32.62	0.92	85.3	2.5	9	0.27	47.3	1.5	8.66	0.28	21.22	0.79	2.602	0.076	15.57	0.55	2.284	0.079	27.3	1.1	12.21	0.25
A_McClure_6	72.3	2	3130	100	199.4	7.2	1804	58	2871	88	258	8	871	22	100.2	3.1	55.3	1.3	65.7	2.1	7.02	0.22	36.6	1.2	6.9	0.23	18.09	0.64	2.237	0.085	13.48	0.59	1.799	0.072	49.5	1.7	16.63	0.35
A_McClure_7	81.7	2.5	4330	160	215.9	8.2	1453	54	2413	88	219.2	9.3	769	27	96.7	3.3	28.15	0.81	67.4	2.2	7.55	0.25	40.1	1.5	7.81	0.3	20.36	0.79	2.64	0.12	15.73	0.57	2.353	0.095	25.2	1	11.33	0.27
A_McClure_8	90.9	3.8	3780	170	124.5	5.4	1323	47	1988	82	167.6	5.7	563	22	61.5	3	26.9	1.2	42.5	1.7	4.22	0.18	22.4	0.84	4.45	0.21	11.37	0.37	1.445	0.076	8.72	0.4	1.319	0.059	31.1	1.2	11.38	0.34
A_McClure_9	129.8	4.2	3710	120	256.7	7.8	2000	73	3180	100	273	11	909	31	104.8	3.5	43.5	1.4	69.6	2.2	7.69	0.22	43.3	1.4	8.38	0.38	23.7	1	3.216	0.097	21.21	0.93	2.92	0.11	92	8.7	23.2	0.95
A_McClure_10	80.9	3.2	3660	120	237.3	7.2	1818	63	2890	110	276	12	925	36	109.7	4.1	39.3	1.2	74.1	2.4	7.93	0.29	43.8	2	8.02	0.29	22.06	0.9	2.84	0.12	17.13	0.95	2.46	0.12	58.9	2.3	19.33	0.74
A_McClure_11	93.7	2.9	3860	110	210.6	7	1786	63	2707	90	255.5	8.8	897	29	106.1	3.8	36.6	1.4	70.2	2.4	7.49	0.23	39	1.3	7.29	0.21	19.16	0.74	2.35	0.1	14.41	0.53	2.03	0.076	38.9	1.2	15.7	0.46
A_McClure_12	112.1	3.5	4840	130	255.2	8.9	1597	58	2920	130	285.4	9.9	997	25	128.1	4.8	36.83	0.97	86.4	2.9	9.55	0.27	50.6	1.5	9.09	0.28	23.56	0.66	2.88	0.11	16.42	0.48	2.037	0.077	38.8	1.2	13.81	0.31
A_McClure_13	102.7	3.5	4190	140	319	13	1707	82	3034	96	329	15	1201	51	167.4	7.1	42.6	1.5	118.2	4.1	12.56	0.43	68.4	2.3	11.97	0.42	29.4	1	3.55	0.17	18.87	0.78	2.22	0.11	36.6	1.6	13.52	0.62
A_McClure_14	110.9	4.1	4220	170	146.9	4.5	1368	53	2161	65	182.3	7.1	613	29	69.1	3	26.61	0.81	45.4	1.8	4.73	0.19	25	1	4.67	0.18	12.59	0.48	1.584	0.075	10.62	0.48	1.588	0.066	34.9	1.4	12.25	0.34
A_McClure_15	99.8	3	4000	100	306	20	2230	150	3660	270	342	24	1229	92	148	11	54.9	4.2	98.3	7.4	10.68	0.71	58.7	4.2	10.72	0.77	28.9	2	3.63	0.29	22.5	1.7	3.3	0.21	56.3	5.2	20.5	1.9
A_McClure_16	86.4	3.2	3850	120	120.6	4.8	1488	53	2188	97	190.6	7.4	599	22	66.7	2.5	27.61	0.96	43.5	1.7	4.2	0.15	21.76	0.82	3.96	0.19	10.09	0.46	1.202	0.054	6.71	0.36	0.952	0.055	46.3	2.3	12.49	0.54
A_McClure_17	123.1	2.5	4049	86	227.7	3.9	1619	25	2719	60	254.2	5.6	908	18	110.1	3.2	35.28	0.72	72.9	1.9	8.02	0.2	43.1	1.1	7.9	0.22	20.99	0.65	2.697	0.082	15.55	0.44	2.07	0.085	56.8	1.7	15.54	0.26
A_McClure_18	108.2	3	3770	130	208	12	1488	86	2640	130	240	13	868	51	105.3	6.4	33.9	1.9	70.8	4.2	7.74	0.42	40.8	2.5	7.23	0.43	18.4	1.1	2.36	0.15	13.7	0.94	1.87	0.12	22.8	1.9	9.89	0.68
A_McClure_19	89.4	1.9	4130	88	199.5	7.1	1652	32	2680	55	242.3	7.8	862	25	102.9	4	40.48	0.78	65.9	2.8	6.98	0.29	38.4	1.7	6.95	0.26	17.92	0.71	2.3	0.12	12.6	0.52	1.695	0.075	55.5	1.3	16.96	0.28
A_McClure_20	109.3	3.1	4360	150	265.9	9.8	1448	41	2840	100	288.5	9.2	1042	36	144	5.4	34.49	0.96	96.7	3	10.43	0.36	55.2	1.8	9.83	0.3	24.43	0.78	2.98	0.14	16.13	0.56	2.007	0.078	27.18	0.98	9.35	0.22
A_McClure_21	94.2	3.4	3680	110	159.3	7.3	1728	68	2602	95	221	7.3	739	26	85.1	3.3	32.7	1	54.2	2.2	5.9	0.21	30.1	1.1	5.54	0.2	14.78	0.7	1.928	0.089	11.48	0.6	1.742	0.072	46.9	1.9	16.72	0.52
A_McClure_22	108.8	2.6	3693	95	103.8	3.1	1134	40	1731	40	150.6	3.5	521	15	61.3	1.8	20.46	0.6	41.3	1	4.1	0.14	21.14	0.64	3.76	0.13	9.46	0.29	1.059	0.069	6.19	0.3	0.911	0.034	28.84	0.76	9.65	0.19
