# Supplementary material
Source: publisher figshare collection journal article supplement (https://gsapubs.figshare.com/articles/dataset/_/23800587)
Supplement: Supplementary file 1 [file 1]

Er-Kun Xue, David Chew, Foteini Drakou and Wei Wang, 2023, Paleogeographical reconstruction of the South China Block during Gondwana assembly using detrital apatite: Pan-African source affinity concealed by detrital zircon: GSA Bulletin, <https://doi.org/10.1130/B36988.1>.

## Supplemental Material

**Table S1.** U-Pb isotopic compositions of detrital apatites.

**Table S2.** Trace elemental compositions of detrital apatites.

**Table S3.** References for data of detrital zircon, and igneous, and metamorphic apatite and monazite from the potential source terranes.
